# Supplementary material for: A DFT Study on Sc-Catalyzed Diastereoselective Cyclization of 2-Picoline with 1,5-Hexadiene: Mechanism and Origins of Regio- and Stereoselectivity
Source: MDPI journal article supplement (doi:10.3390/inorganics14010028), 2026-01-16
Supplement: s1 [file inorganics-4037896-supplementary.pdf › inorganics-4037896-supplementary.pdf]

# A DFT Study on Sc-Catalyzed Diastereoselective Cyclization of 2-picoline with 1,5-hexadiene: Mechanism and Origins of Regio- and Stereoselectivity

Guangli Zhou <sup>1</sup>, Shuangxin Zhai <sup>1</sup>, Xia Leng <sup>1</sup>, Yunzhi Li <sup>1</sup>, Qiying Xia <sup>1,\*</sup>, Yi Luo <sup>2,3,\*</sup>

<sup>1</sup>School of Chemistry and Chemical Engineering, Linyi University, Linyi 276000, China;

<sup>2</sup>State Key Laboratory of Fine Chemicals, School of Chemical Engineering, Dalian University of Technology, Dalian 116024, China;

<sup>3</sup>PetroChina Petrochemical Research Institute, Beijing, 102206, China;

\*Correspondence: xiaqiying@lyu.edu.cn(Q.X.); luoyio10@petrochina.com.cn (Y.L.)

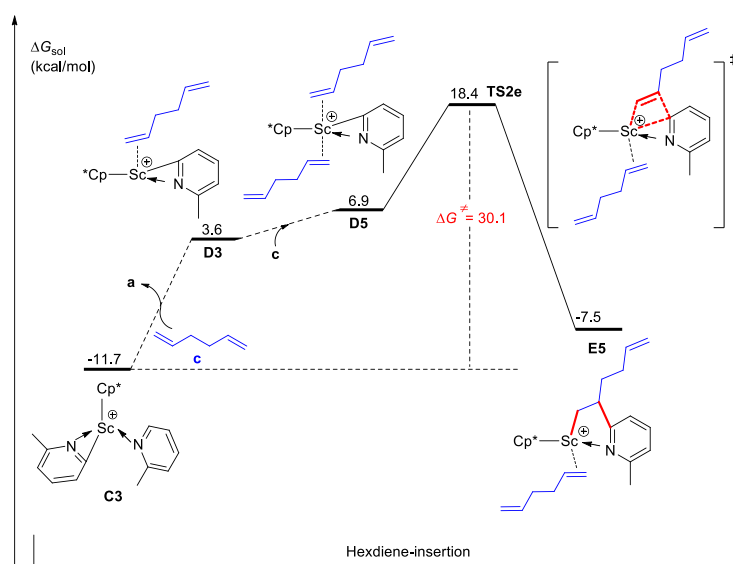

**Figure S1.** The computed energy profiles for 1,5-hexadiene insertion based on species **D1** with a coordinated 1,5-hexadiene.

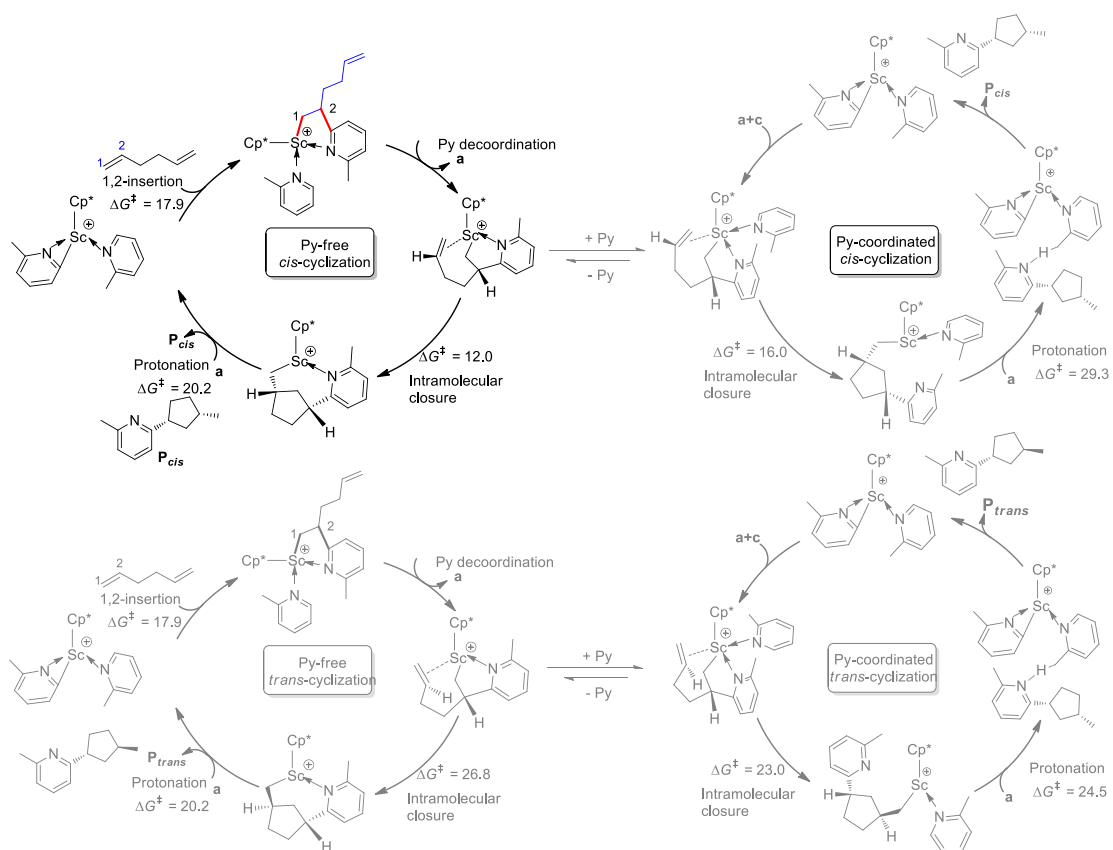

**Figure S2.** The computed energy profiles for *cis*-cyclization and *trans*-cyclization processes based on 1,5-hexadiene insertion intermediate.

**Table S1** Computed free energy  $\Delta G$  (kcal/mol) for all the species including solution-phase single point energies, the gas phase zero-point correction, thermal correction to enthalpy, thermal correction to Gibbs free energy

| Structural name | SCF_D        | Zero-point correction | Thermal correction to Enthalpy | Thermal correction to Gibbs Free Energy | $\Delta G$ (kcal/mol) | $\Delta G^a$ (kcal/mol) |
|-----------------|--------------|-----------------------|--------------------------------|-----------------------------------------|-----------------------|-------------------------|
| <b>1</b>        | -841.2740312 | 0.416149              | 0.441294                       | 0.362838                                |                       |                         |
| <b>a</b>        | -287.455585  | 0.116808              | 0.123831                       | 0.086328                                | 0.0                   | 0.0                     |
| <b>c</b>        | -234.4746958 | 0.142728              | 0.15103                        | 0.111134                                |                       |                         |
| <b>A1</b>       | -1128.775138 | 0.535794              | 0.568                          | 0.475131                                | -12.3                 | -14.2                   |
| <b>TS1a</b>     | -1128.73449  | 0.53184               | 0.563563                       | 0.472149                                | 11.4                  | 9.5                     |
| <b>B1</b>       | -1128.763656 | 0.535831              | 0.568549                       | 0.473538                                | -6.1                  | -8.0                    |
| <b>C1</b>       | -723.4147717 | 0.330278              | 0.352232                       | 0.278763                                |                       |                         |
| <b>b</b>        | -405.3124902 | 0.202609              | 0.213438                       | 0.168167                                | 0.1                   | 0.1                     |
| <b>A2</b>       | -1128.775103 | 0.535153              | 0.567715                       | 0.472516                                | -13.9                 | -15.8                   |
| <b>TS1b</b>     | -1128.735015 | 0.532514              | 0.563544                       | 0.474121                                | 12.3                  | 10.4                    |
| <b>B2</b>       | -1128.764134 | 0.535569              | 0.567822                       | 0.474446                                | -5.8                  | -7.7                    |
| <b>C2</b>       | -723.415195  | 0.329696              | 0.351184                       | 0.276601                                | -1.5                  | -1.5                    |
| <b>A3</b>       | -1416.256088 | 0.65574               | 0.694787                       | 0.587251                                | -12.0                 | -15.8                   |
| <b>TS1c</b>     | -1416.212011 | 0.651059              | 0.68992                        | 0.582483                                | 12.7                  | 8.9                     |
| <b>B3</b>       | -1416.231362 | 0.652504              | 0.69415                        | 0.571892                                | -6.1                  | -9.9                    |
| <b>C3</b>       | -1010.912364 | 0.449343              | 0.478644                       | 0.38839                                 | -11.7                 | -13.6                   |
| <b>A4</b>       | -1416.253937 | 0.655947              | 0.694922                       | 0.587571                                | -10.5                 | -14.3                   |
| <b>TS1d</b>     | -1416.201456 | 0.650776              | 0.689483                       | 0.581885                                | 18.9                  | 15.1                    |
| <b>B4</b>       | -1416.238509 | 0.652778              | 0.693612                       | 0.575065                                | -8.6                  | -12.4                   |
| <b>C4</b>       | -1010.915246 | 0.448695              | 0.477618                       | 0.388736                                | -13.3                 | -15.2                   |
| <b>D1</b>       | -1245.399795 | 0.594728              | 0.632364                       | 0.524099                                | -4.2                  | -8.0                    |
| <b>TS2a</b>     | -1245.38687  | 0.595136              | 0.631113                       | 0.527752                                | 6.2                   | 22.4                    |
| <b>E1</b>       | -1245.43191  | 0.596081              | 0.632507                       | 0.528025                                | -21.9                 | -25.7                   |
| <b>D2</b>       | -1245.395505 | 0.594462              | 0.632373                       | 0.522404                                | -2.6                  | -6.4                    |
| <b>TS2b</b>     | -1245.383536 | 0.594619              | 0.630988                       | 0.527038                                | 7.8                   | 4.0                     |
| <b>E2</b>       | -1245.431343 | 0.596808              | 0.63303                        | 0.529326                                | -20.8                 | -24.6                   |
| <b>D3</b>       | -957.9035714 | 0.474614              | 0.50551                        | 0.409673                                | 3.6                   | 1.7                     |
| <b>TS2c</b>     | -957.8856285 | 0.47474               | 0.504046                       | 0.413916                                | 17.6                  | 15.7                    |
| <b>E3</b>       | -957.9347774 | 0.475991              | 0.505554                       | 0.414583                                | -12.9                 | -14.8                   |
| <b>D4</b>       | -957.9033762 | 0.474637              | 0.505314                       | 0.411799                                | 5.1                   | 3.2                     |
| <b>TS2d</b>     | -957.8833209 | 0.474469              | 0.503892                       | 0.414416                                | 19.3                  | 17.4                    |
| <b>E4</b>       | -957.9330353 | 0.476528              | 0.505866                       | 0.417174                                | -10.1                 | -12.0                   |
| <b>F1</b>       | -1245.433461 | 0.596015              | 0.632675                       | 0.527001                                | -23.5                 | -27.3                   |
| <b>TS3a</b>     | -1245.395868 | 0.592558              | 0.62844                        | 0.524956                                | -1.2                  | -5.0                    |
| <b>G1</b>       | -1245.431665 | 0.597224              | 0.633585                       | 0.528484                                | -21.5                 | -25.3                   |

|                             |              |          |          |          |       |       |
|-----------------------------|--------------|----------|----------|----------|-------|-------|
| <b>P<sub>mono</sub></b>     | -521.9758354 | 0.263924 | 0.278817 | 0.221585 | -25.1 | -28.9 |
| <b>F2</b>                   | -1532.903503 | 0.716223 | 0.759724 | 0.639103 | -16.4 | -22.1 |
| <b>TS3b</b>                 | -1532.863641 | 0.712513 | 0.755382 | 0.637482 | 7.6   | 1.9   |
| <b>G2</b>                   | -1532.920631 | 0.717048 | 0.760803 | 0.641232 | -25.9 | -31.6 |
| <b>H1</b>                   | -1245.429658 | 0.598381 | 0.633322 | 0.535222 | -16.0 | -19.8 |
| <b>TS4a</b>                 | -1245.414793 | 0.598521 | 0.632246 | 0.536366 | -5.9  | -9.7  |
| <b>J1</b>                   | -1245.426077 | 0.598655 | 0.634009 | 0.530328 | -16.8 | -20.6 |
| <b>H2</b>                   | -1245.430943 | 0.595822 | 0.632396 | 0.52607  | -22.5 | -26.3 |
| <b>TS4b</b>                 | -1245.397317 | 0.595753 | 0.630937 | 0.529164 | 0.5   | -3.3  |
| <b>J2</b>                   | -1245.424945 | 0.598542 | 0.633941 | 0.530262 | -16.2 | -20.0 |
| <b>H3</b>                   | -957.9484622 | 0.477874 | 0.506121 | 0.422053 | -16.8 | -18.7 |
| <b>TS4c</b>                 | -957.9383673 | 0.478326 | 0.50537  | 0.422894 | -9.9  | -11.8 |
| <b>J3</b>                   | -957.9536195 | 0.480157 | 0.507698 | 0.424301 | -18.6 | -20.5 |
| <b>H4</b>                   | -957.9447328 | 0.477982 | 0.506368 | 0.421569 | -14.7 | -16.6 |
| <b>TS4d</b>                 | -957.9143371 | 0.477899 | 0.50512  | 0.422523 | 4.9   | 3.0   |
| <b>J4</b>                   | -957.945136  | 0.480947 | 0.508018 | 0.426561 | -11.9 | -13.8 |
| <b>K1<sub>cis</sub></b>     | -1245.444822 | 0.600277 | 0.634798 | 0.536848 | -24.5 | -28.3 |
| <b>TS5a<sub>cis</sub></b>   | -1245.41035  | 0.59692  | 0.630733 | 0.534622 | -4.3  | -8.1  |
| <b>L1<sub>cis</sub></b>     | -1245.463311 | 0.600758 | 0.635785 | 0.535425 | -37.0 | -40.8 |
| <b>P<sub>cis</sub></b>      | -522.0036133 | 0.267134 | 0.280754 | 0.226551 | -39.4 | -43.2 |
| <b>K2<sub>trans</sub></b>   | -1245.43409  | 0.600322 | 0.634829 | 0.535848 | -18.4 | -22.2 |
| <b>TS5b<sub>trans</sub></b> | -1245.400686 | 0.59716  | 0.630875 | 0.534641 | 1.8   | -2.0  |
| <b>L2<sub>trans</sub></b>   | -1245.461814 | 0.60023  | 0.635538 | 0.533679 | -37.1 | -40.9 |
| <b>P<sub>trans</sub></b>    | -522.0039091 | 0.267199 | 0.280718 | 0.225782 | -40.1 | -43.9 |
| <b>K3<sub>cis</sub></b>     | -1532.92197  | 0.717672 | 0.760763 | 0.639038 | -28.1 | -33.8 |
| <b>TS5c<sub>cis</sub></b>   | -1532.875212 | 0.71491  | 0.757079 | 0.638908 | 1.2   | -4.5  |
| <b>L3<sub>cis</sub></b>     | -1532.92584  | 0.717206 | 0.761394 | 0.632521 | -34.6 | -40.3 |
| <b>K4<sub>trans</sub></b>   | -1532.924438 | 0.718172 | 0.760813 | 0.641965 | -27.8 | -33.5 |
| <b>TS5d<sub>trans</sub></b> | -1532.884541 | 0.715102 | 0.756893 | 0.641036 | -3.3  | -9.0  |
| <b>L4<sub>trans</sub></b>   | -1532.925819 | 0.717227 | 0.761536 | 0.631308 | -35.3 | -41.0 |
| <b>D5</b>                   | -1192.397097 | 0.619652 | 0.659    | 0.544843 | 6.9   | 3.1   |
| <b>TS2e</b>                 | -1192.381107 | 0.619609 | 0.657611 | 0.547166 | 18.4  | 14.6  |
| <b>E5</b>                   | -1192.422233 | 0.620704 | 0.659042 | 0.546993 | -7.5  | -11.3 |

$\Delta G^a$ : A free energy of solvation calculated was added to the thermodynamic corrections for Gibbs free energy and 1.9 kcal/mol (the standard state change from 1 atm (1 mol of an ideal gas) to 1 mol/L (1 mol/L in toluene solution) at 298.15 K) to get the final solution-phase Gibbs free energies for all the species.

---

## DFT Optimized Cartesian Coordinates of All Structures

Optimized Cartesian coordinates and their corresponding single-point energies ( $E_{\text{SCRF}}$ , a.u.), calculated at the M06/6-311+G(d,p)/SDD/CPCM(chlorobenzene)//B3PW91/6-31G(d)/SDD level as well as the imaginary frequency (IF,  $\text{cm}^{-1}$ ) of transition states.

48 (the number of atoms involved in the molecule)

1,  $E_{\text{SCRF}} = -841.2740312$  a.u.

|    |              |              |              |
|----|--------------|--------------|--------------|
| Sc | 0.272897000  | 0.423093000  | -0.336293000 |
| N  | -1.579801000 | 1.760195000  | -0.412293000 |
| C  | -0.791004000 | -0.477306000 | -2.028593000 |
| H  | -0.899003000 | 0.337294000  | -2.753993000 |
| H  | -0.542706000 | -1.407206000 | -2.538193000 |
| C  | -1.852604000 | -0.615804000 | -1.025693000 |
| C  | -2.210703000 | 0.466396000  | -0.155393000 |
| C  | -3.109203000 | 0.275197000  | 0.909107000  |
| H  | -3.397802000 | 1.111198000  | 1.538107000  |
| C  | -3.651305000 | -0.976502000 | 1.154007000  |
| H  | -4.350905000 | -1.111301000 | 1.973207000  |
| C  | -3.297307000 | -2.057502000 | 0.335807000  |
| H  | -3.723308000 | -3.039602000 | 0.520807000  |
| C  | -2.415506000 | -1.879604000 | -0.715493000 |
| H  | -2.157508000 | -2.719104000 | -1.355193000 |
| C  | -1.549200000 | 2.677095000  | 0.744407000  |
| H  | -2.546699000 | 3.058497000  | 0.996307000  |
| H  | -0.915198000 | 3.533194000  | 0.495507000  |
| H  | -1.142800000 | 2.175995000  | 1.630807000  |
| C  | -2.143900000 | 2.467496000  | -1.586393000 |
| H  | -2.250001000 | 1.781596000  | -2.426493000 |
| H  | -1.481099000 | 3.289895000  | -1.871593000 |
| H  | -3.133799000 | 2.871897000  | -1.340793000 |
| C  | 2.630797000  | 0.617289000  | -0.009593000 |
| C  | 2.035097000  | 0.429790000  | 1.276207000  |
| C  | 1.458195000  | -0.879609000 | 1.305807000  |
| C  | 1.719394000  | -1.505010000 | 0.046907000  |
| C  | 2.437096000  | -0.581911000 | -0.767493000 |
| C  | 2.088698000  | 1.398990000  | 2.424707000  |
| H  | 1.242198000  | 1.282791000  | 3.110007000  |
| H  | 2.114300000  | 2.443190000  | 2.094107000  |
| H  | 2.997198000  | 1.236489000  | 3.019307000  |
| C  | 0.801094000  | -1.530308000 | 2.491107000  |
| H  | 1.537793000  | -2.096409000 | 3.075907000  |
| H  | 0.016893000  | -2.234607000 | 2.195207000  |
| H  | 0.351295000  | -0.799308000 | 3.170907000  |
| C  | 1.379992000  | -2.920009000 | -0.315593000 |
| H  | 1.225492000  | -3.042009000 | -1.391893000 |
| H  | 0.478692000  | -3.271208000 | 0.196207000  |
| H  | 2.197291000  | -3.594110000 | -0.027593000 |
| C  | 2.976895000  | -0.850511000 | -2.141693000 |
| H  | 3.986595000  | -1.277513000 | -2.081393000 |

---

|   |             |              |              |
|---|-------------|--------------|--------------|
| H | 3.052997000 | 0.060488000  | -2.744393000 |
| H | 2.355494000 | -1.561911000 | -2.693393000 |
| C | 3.400899000 | 1.828188000  | -0.460493000 |
| H | 4.469499000 | 1.708886000  | -0.238693000 |
| H | 3.322299000 | 1.994788000  | -1.540593000 |
| H | 3.076000000 | 2.743588000  | 0.046207000  |

14

a,  $E_{(\text{SCRF})} = -287.455585$  a.u.

|   |              |              |              |
|---|--------------|--------------|--------------|
| C | 0.875227000  | 0.007351000  | -0.000860000 |
| C | 0.156539000  | 1.208643000  | -0.000598000 |
| C | -1.234775000 | 1.167678000  | 0.000216000  |
| C | -1.868918000 | -0.071614000 | 0.000605000  |
| C | -1.068474000 | -1.212537000 | 0.000080000  |
| N | 0.265495000  | -1.187511000 | -0.000704000 |
| H | -1.813514000 | 2.088263000  | 0.000290000  |
| H | 0.684528000  | 2.158577000  | -0.001123000 |
| H | -2.951885000 | -0.155504000 | 0.001000000  |
| C | 2.380035000  | -0.012426000 | 0.000534000  |
| H | 2.801800000  | 0.996940000  | -0.022390000 |
| H | 2.752680000  | -0.526402000 | 0.893900000  |
| H | 2.753512000  | -0.568475000 | -0.866556000 |
| H | -1.523392000 | -2.203393000 | -0.000057000 |

62

Al,  $E_{(\text{SCRF})} = -1128.775138$  a.u.

|    |              |              |              |
|----|--------------|--------------|--------------|
| Sc | -0.041213000 | 0.042701000  | -0.062586000 |
| N  | 0.965980000  | -1.906754000 | 0.731179000  |
| C  | 0.786488000  | -0.781504000 | -1.931027000 |
| H  | 0.209298000  | -1.703532000 | -2.089996000 |
| H  | 0.892713000  | -0.264817000 | -2.887248000 |
| C  | 2.094650000  | -0.999655000 | -1.273277000 |
| C  | 2.204097000  | -1.519929000 | 0.047054000  |
| C  | 3.452001000  | -1.650795000 | 0.671614000  |
| H  | 3.526251000  | -2.072920000 | 1.668057000  |
| C  | 4.612531000  | -1.253862000 | 0.022057000  |
| H  | 5.573759000  | -1.368170000 | 0.514014000  |
| C  | 4.531226000  | -0.717519000 | -1.266351000 |
| H  | 5.434061000  | -0.411049000 | -1.787489000 |
| C  | 3.299572000  | -0.592083000 | -1.889410000 |
| H  | 3.244805000  | -0.198013000 | -2.900861000 |
| C  | 1.077275000  | -1.934305000 | 2.202214000  |
| H  | 1.708423000  | -2.762490000 | 2.549837000  |
| H  | 0.081737000  | -2.074864000 | 2.630070000  |
| H  | 1.496747000  | -0.994458000 | 2.569852000  |
| C  | 0.472143000  | -3.224855000 | 0.267870000  |
| H  | 0.420327000  | -3.251532000 | -0.820337000 |
| H  | -0.525618000 | -3.406675000 | 0.677826000  |
| H  | 1.149765000  | -4.020707000 | 0.603856000  |
| C  | -1.109984000 | 2.131639000  | 0.748815000  |
| C  | 0.044484000  | 1.892063000  | 1.557934000  |
| C  | 1.196203000  | 1.993418000  | 0.720627000  |

---

|   |              |              |              |
|---|--------------|--------------|--------------|
| C | 0.752344000  | 2.291351000  | -0.606131000 |
| C | -0.669015000 | 2.375174000  | -0.583789000 |
| C | 0.054888000  | 1.757271000  | 3.055560000  |
| H | 0.957356000  | 1.257587000  | 3.421610000  |
| H | -0.810977000 | 1.207809000  | 3.442159000  |
| H | 0.032175000  | 2.747701000  | 3.529352000  |
| C | 2.629332000  | 1.967711000  | 1.169130000  |
| H | 2.983621000  | 2.988018000  | 1.368594000  |
| H | 3.291331000  | 1.535264000  | 0.413142000  |
| H | 2.767537000  | 1.397257000  | 2.092875000  |
| C | 1.634452000  | 2.630028000  | -1.770018000 |
| H | 1.148484000  | 2.420090000  | -2.727737000 |
| H | 2.576473000  | 2.075071000  | -1.744283000 |
| H | 1.885573000  | 3.699280000  | -1.761749000 |
| C | -1.541941000 | 2.758866000  | -1.742864000 |
| H | -1.599685000 | 3.851370000  | -1.838872000 |
| H | -2.568238000 | 2.396328000  | -1.624117000 |
| H | -1.156399000 | 2.377715000  | -2.694963000 |
| C | -2.518761000 | 2.291218000  | 1.242926000  |
| H | -2.752343000 | 3.353627000  | 1.392784000  |
| H | -3.259163000 | 1.900188000  | 0.536450000  |
| H | -2.678888000 | 1.796762000  | 2.205969000  |
| C | -3.095047000 | -1.147552000 | 0.558071000  |
| C | -4.389132000 | -1.524069000 | 0.191442000  |
| C | -4.774593000 | -1.476651000 | -1.142797000 |
| C | -3.850725000 | -1.047400000 | -2.093690000 |
| C | -2.583278000 | -0.689346000 | -1.661903000 |
| N | -2.201743000 | -0.733436000 | -0.367542000 |
| H | -5.779383000 | -1.767214000 | -1.435842000 |
| H | -5.084566000 | -1.850571000 | 0.958731000  |
| H | -4.101432000 | -0.989358000 | -3.147573000 |
| H | -1.829949000 | -0.351325000 | -2.367984000 |
| C | -2.655698000 | -1.225511000 | 1.990981000  |
| H | -3.478086000 | -0.979238000 | 2.668978000  |
| H | -2.326711000 | -2.241973000 | 2.242002000  |
| H | -1.834256000 | -0.532789000 | 2.201507000  |

62

TS1a,  $E_{\text{(SCRF)}} = -1128.73449$  a.u., IF =  $i1304.8009$  cm<sup>-1</sup>

|    |              |              |              |
|----|--------------|--------------|--------------|
| Sc | -0.067482000 | 0.045806000  | -0.032742000 |
| N  | 0.823871000  | -2.024298000 | 0.539291000  |
| C  | 0.867847000  | -0.765231000 | -2.089552000 |
| H  | 0.587161000  | -1.715374000 | -2.563728000 |
| H  | 1.053679000  | -0.046894000 | -2.893782000 |
| C  | 2.099319000  | -0.919716000 | -1.248268000 |
| C  | 2.098041000  | -1.558071000 | 0.020718000  |
| C  | 3.286759000  | -1.698197000 | 0.752201000  |
| H  | 3.280503000  | -2.204155000 | 1.711898000  |
| C  | 4.485649000  | -1.211980000 | 0.250912000  |
| H  | 5.400580000  | -1.341099000 | 0.821523000  |
| C  | 4.507973000  | -0.566594000 | -0.988417000 |

---

|   |              |              |              |
|---|--------------|--------------|--------------|
| H | 5.443341000  | -0.189106000 | -1.391625000 |
| C | 3.334228000  | -0.420932000 | -1.712385000 |
| H | 3.359165000  | 0.060182000  | -2.686392000 |
| C | 0.762413000  | -2.165378000 | 2.004076000  |
| H | 1.344671000  | -3.024663000 | 2.362889000  |
| H | -0.280674000 | -2.319501000 | 2.293002000  |
| H | 1.138575000  | -1.260799000 | 2.491297000  |
| C | 0.360058000  | -3.278762000 | -0.090096000 |
| H | 0.406207000  | -3.202869000 | -1.175802000 |
| H | -0.674608000 | -3.468398000 | 0.206417000  |
| H | 0.990002000  | -4.119773000 | 0.229017000  |
| C | -1.175572000 | 2.096388000  | 0.769940000  |
| C | -0.088029000 | 1.810210000  | 1.650151000  |
| C | 1.126447000  | 1.948460000  | 0.911829000  |
| C | 0.784682000  | 2.308959000  | -0.428120000 |
| C | -0.636902000 | 2.402679000  | -0.511858000 |
| C | -0.202166000 | 1.553809000  | 3.127004000  |
| H | 0.670562000  | 1.027166000  | 3.526885000  |
| H | -1.093120000 | 0.971099000  | 3.386794000  |
| H | -0.275155000 | 2.501140000  | 3.677534000  |
| C | 2.518651000  | 1.895020000  | 1.472510000  |
| H | 2.865114000  | 2.905166000  | 1.729247000  |
| H | 3.236714000  | 1.476841000  | 0.760843000  |
| H | 2.575970000  | 1.299439000  | 2.389341000  |
| C | 1.748398000  | 2.728652000  | -1.499117000 |
| H | 1.398263000  | 2.465753000  | -2.503423000 |
| H | 2.735869000  | 2.281032000  | -1.358314000 |
| H | 1.882151000  | 3.818732000  | -1.485212000 |
| C | -1.407600000 | 2.889833000  | -1.703783000 |
| H | -1.462941000 | 3.986698000  | -1.704276000 |
| H | -2.435309000 | 2.514708000  | -1.712183000 |
| H | -0.935910000 | 2.593737000  | -2.646771000 |
| C | -2.620849000 | 2.192822000  | 1.158528000  |
| H | -2.876749000 | 3.223012000  | 1.439651000  |
| H | -3.288340000 | 1.908251000  | 0.338827000  |
| H | -2.859425000 | 1.559600000  | 2.018711000  |
| C | -3.269280000 | -1.286310000 | 0.444250000  |
| C | -4.319378000 | -1.412469000 | -0.467946000 |
| C | -4.126893000 | -1.064249000 | -1.804744000 |
| C | -2.883271000 | -0.593793000 | -2.225431000 |
| C | -1.872532000 | -0.490047000 | -1.273773000 |
| N | -2.077059000 | -0.834804000 | 0.009116000  |
| H | -4.947777000 | -1.157776000 | -2.511187000 |
| H | -5.283421000 | -1.776914000 | -0.126229000 |
| H | -2.707709000 | -0.315495000 | -3.260433000 |
| H | -0.528059000 | -0.513183000 | -1.764455000 |
| C | -3.410427000 | -1.659977000 | 1.889733000  |
| H | -4.449842000 | -1.584498000 | 2.220275000  |
| H | -3.090129000 | -2.696904000 | 2.055230000  |
| H | -2.795324000 | -1.014134000 | 2.523008000  |



B1,  $E_{(\text{SCRF})} = -1128.763656$  a.u.

|    |              |              |              |
|----|--------------|--------------|--------------|
| Sc | -0.323888000 | 0.096754000  | -0.045394000 |
| N  | 1.060922000  | -1.682437000 | 0.612725000  |
| C  | 1.645482000  | -1.015093000 | -2.235447000 |
| H  | 1.711764000  | -1.955626000 | -2.798965000 |
| H  | 1.817894000  | -0.204563000 | -2.949027000 |
| C  | 2.673297000  | -0.976144000 | -1.128867000 |
| C  | 2.419844000  | -1.322617000 | 0.215046000  |
| C  | 3.462844000  | -1.309978000 | 1.148284000  |
| H  | 3.281856000  | -1.587727000 | 2.180371000  |
| C  | 4.752942000  | -0.948856000 | 0.772031000  |
| H  | 5.546995000  | -0.948047000 | 1.512869000  |
| C  | 5.015317000  | -0.595796000 | -0.548494000 |
| H  | 6.017193000  | -0.310200000 | -0.854895000 |
| C  | 3.981106000  | -0.613710000 | -1.477872000 |
| H  | 4.185675000  | -0.345043000 | -2.511715000 |
| C  | 0.825429000  | -1.661600000 | 2.071095000  |
| H  | 1.357038000  | -2.470554000 | 2.589309000  |
| H  | -0.245411000 | -1.801223000 | 2.251381000  |
| H  | 1.142306000  | -0.705577000 | 2.498015000  |
| C  | 0.679345000  | -3.023321000 | 0.099582000  |
| H  | 0.811952000  | -3.073153000 | -0.980579000 |
| H  | -0.371864000 | -3.211703000 | 0.331485000  |
| H  | 1.302570000  | -3.796272000 | 0.567656000  |
| C  | -1.504419000 | 2.183157000  | 0.454172000  |
| C  | -0.458498000 | 2.042964000  | 1.414794000  |
| C  | 0.791296000  | 2.126911000  | 0.725441000  |
| C  | 0.510548000  | 2.304655000  | -0.663289000 |
| C  | -0.908428000 | 2.339333000  | -0.830887000 |
| C  | -0.640288000 | 1.962486000  | 2.904696000  |
| H  | 0.213155000  | 1.492332000  | 3.404647000  |
| H  | -1.540766000 | 1.406370000  | 3.186984000  |
| H  | -0.741325000 | 2.967586000  | 3.335034000  |
| C  | 2.152224000  | 2.190753000  | 1.358537000  |
| H  | 2.426093000  | 3.233559000  | 1.568272000  |
| H  | 2.932378000  | 1.775565000  | 0.713395000  |
| H  | 2.194621000  | 1.657529000  | 2.314215000  |
| C  | 1.525745000  | 2.579847000  | -1.735555000 |
| H  | 1.166198000  | 2.286514000  | -2.727242000 |
| H  | 2.476086000  | 2.068719000  | -1.551370000 |
| H  | 1.744972000  | 3.654876000  | -1.784761000 |
| C  | -1.641361000 | 2.643332000  | -2.105195000 |
| H  | -1.781660000 | 3.726581000  | -2.219521000 |
| H  | -2.632925000 | 2.181902000  | -2.124623000 |
| H  | -1.097990000 | 2.294235000  | -2.988932000 |
| C  | -2.973106000 | 2.269096000  | 0.747717000  |
| H  | -3.295174000 | 3.318026000  | 0.788691000  |
| H  | -3.577865000 | 1.776224000  | -0.020354000 |
| H  | -3.226650000 | 1.819448000  | 1.712424000  |

---

|                                             |              |              |              |
|---------------------------------------------|--------------|--------------|--------------|
| C                                           | -3.297327000 | -1.540430000 | 0.580996000  |
| C                                           | -4.241166000 | -1.983873000 | -0.340672000 |
| C                                           | -4.010021000 | -1.814397000 | -1.710392000 |
| C                                           | -2.841719000 | -1.197779000 | -2.148194000 |
| C                                           | -1.913978000 | -0.759789000 | -1.197359000 |
| N                                           | -2.171159000 | -0.954326000 | 0.117968000  |
| H                                           | -4.752216000 | -2.161408000 | -2.425463000 |
| H                                           | -5.153467000 | -2.456651000 | 0.010600000  |
| H                                           | -2.655730000 | -1.052649000 | -3.208661000 |
| H                                           | 0.586202000  | -0.957355000 | -1.932836000 |
| C                                           | -3.464464000 | -1.703455000 | 2.062733000  |
| H                                           | -4.506986000 | -1.901302000 | 2.325291000  |
| H                                           | -2.867329000 | -2.545777000 | 2.435938000  |
| H                                           | -3.138134000 | -0.803320000 | 2.593373000  |
| 39                                          |              |              |              |
| C1, $E_{\text{(SCRF)}} = -723.4147717$ a.u. |              |              |              |
| Sc                                          | 0.051781000  | -0.452924000 | -0.000940000 |
| C                                           | 1.895364000  | 0.534652000  | 1.155084000  |
| C                                           | 2.314560000  | -0.761703000 | 0.714690000  |
| C                                           | 2.315547000  | -0.761586000 | -0.713526000 |
| C                                           | 1.896984000  | 0.534846000  | -1.154280000 |
| C                                           | 1.649904000  | 1.340789000  | 0.000296000  |
| C                                           | 2.743162000  | -1.899990000 | 1.598697000  |
| H                                           | 2.567174000  | -2.878215000 | 1.138367000  |
| H                                           | 2.237645000  | -1.889529000 | 2.570311000  |
| H                                           | 3.819721000  | -1.838431000 | 1.804231000  |
| C                                           | 2.745391000  | -1.899782000 | -1.597051000 |
| H                                           | 3.822601000  | -1.839310000 | -1.799464000 |
| H                                           | 2.242638000  | -1.888054000 | -2.570071000 |
| H                                           | 2.566993000  | -2.878159000 | -1.137943000 |
| C                                           | 1.812214000  | 0.999456000  | -2.580885000 |
| H                                           | 1.028373000  | 1.750046000  | -2.724488000 |
| H                                           | 1.621776000  | 0.176691000  | -3.277847000 |
| H                                           | 2.759172000  | 1.461673000  | -2.888655000 |
| C                                           | 1.318288000  | 2.803130000  | 0.000262000  |
| H                                           | 2.239316000  | 3.400778000  | 0.001621000  |
| H                                           | 0.741176000  | 3.092182000  | 0.883091000  |
| H                                           | 0.743478000  | 3.092717000  | -0.883890000 |
| C                                           | 1.808766000  | 0.999129000  | 2.581618000  |
| H                                           | 2.754943000  | 1.462389000  | 2.890227000  |
| H                                           | 1.023985000  | 1.748864000  | 2.724565000  |
| H                                           | 1.618637000  | 0.176100000  | 3.278344000  |
| C                                           | -3.340981000 | -0.966904000 | -0.000452000 |
| C                                           | -4.339518000 | 0.002351000  | -0.000103000 |
| C                                           | -4.001291000 | 1.360733000  | 0.000044000  |
| C                                           | -2.664754000 | 1.749358000  | -0.000156000 |
| C                                           | -1.683945000 | 0.755653000  | -0.000460000 |
| N                                           | -2.053170000 | -0.551908000 | -0.000577000 |
| H                                           | -4.791409000 | 2.107542000  | 0.000307000  |
| H                                           | -5.381091000 | -0.303889000 | 0.000054000  |

---

|                                             |              |              |              |
|---------------------------------------------|--------------|--------------|--------------|
| H                                           | -2.388800000 | 2.799412000  | -0.000086000 |
| C                                           | -3.617323000 | -2.439727000 | -0.000797000 |
| H                                           | -4.690945000 | -2.641897000 | 0.000944000  |
| H                                           | -3.183983000 | -2.918757000 | -0.887000000 |
| H                                           | -3.180842000 | -2.919817000 | 0.883270000  |
| 23                                          |              |              |              |
| b, $E_{\text{(SCRF)}} = -405.3124902$ a.u.  |              |              |              |
| N                                           | 1.575225000  | -0.057718000 | -0.178263000 |
| C                                           | -0.057435000 | 2.325395000  | -0.375033000 |
| H                                           | 0.208725000  | 2.840816000  | 0.558335000  |
| H                                           | -0.772045000 | 2.968052000  | -0.900140000 |
| C                                           | -0.647807000 | 0.962509000  | -0.131404000 |
| C                                           | 0.165401000  | -0.192772000 | -0.057796000 |
| C                                           | -0.443238000 | -1.447481000 | 0.089001000  |
| H                                           | 0.173670000  | -2.339790000 | 0.141491000  |
| C                                           | -1.827468000 | -1.572647000 | 0.180032000  |
| H                                           | -2.272561000 | -2.558273000 | 0.293664000  |
| C                                           | -2.630275000 | -0.437100000 | 0.133894000  |
| H                                           | -3.711773000 | -0.520614000 | 0.202952000  |
| C                                           | -2.032705000 | 0.811784000  | -0.024205000 |
| H                                           | -2.658195000 | 1.700166000  | -0.092216000 |
| C                                           | 2.296372000  | -1.207098000 | -0.687083000 |
| H                                           | 2.405293000  | -2.029831000 | 0.044461000  |
| H                                           | 3.305894000  | -0.890017000 | -0.974461000 |
| H                                           | 1.794073000  | -1.598361000 | -1.576545000 |
| C                                           | 2.239749000  | 0.517167000  | 0.982484000  |
| H                                           | 1.709329000  | 1.406505000  | 1.328418000  |
| H                                           | 3.260078000  | 0.813144000  | 0.710708000  |
| H                                           | 2.300562000  | -0.193051000 | 1.827350000  |
| H                                           | 0.854804000  | 2.246732000  | -0.975516000 |
| 62                                          |              |              |              |
| A2, $E_{\text{(SCRF)}} = -1128.775103$ a.u. |              |              |              |
| Sc                                          | -0.038534000 | 0.098884000  | -0.114372000 |
| N                                           | 0.764616000  | -1.984821000 | 0.588465000  |
| C                                           | 0.870210000  | -0.648160000 | -1.971822000 |
| H                                           | 0.242914000  | -1.512284000 | -2.230579000 |
| H                                           | 1.075179000  | -0.076919000 | -2.879226000 |
| C                                           | 2.105202000  | -0.996812000 | -1.236253000 |
| C                                           | 2.075293000  | -1.621270000 | 0.043093000  |
| C                                           | 3.257436000  | -1.872306000 | 0.753187000  |
| H                                           | 3.225387000  | -2.370348000 | 1.716409000  |
| C                                           | 4.487897000  | -1.497224000 | 0.231990000  |
| H                                           | 5.396822000  | -1.704517000 | 0.788743000  |
| C                                           | 4.543979000  | -0.862885000 | -1.012810000 |
| H                                           | 5.502624000  | -0.572951000 | -1.434193000 |
| C                                           | 3.377980000  | -0.617949000 | -1.720395000 |
| H                                           | 3.429662000  | -0.144491000 | -2.697240000 |
| C                                           | 0.742897000  | -2.138927000 | 2.054420000  |
| H                                           | 1.304737000  | -3.022992000 | 2.383152000  |
| H                                           | -0.292770000 | -2.271047000 | 2.379947000  |

---

|                                                                                          |              |              |              |
|------------------------------------------------------------------------------------------|--------------|--------------|--------------|
| H                                                                                        | 1.166012000  | -1.254755000 | 2.538215000  |
| C                                                                                        | 0.239812000  | -3.228176000 | -0.023425000 |
| H                                                                                        | 0.294984000  | -3.170058000 | -1.110380000 |
| H                                                                                        | -0.802207000 | -3.372583000 | 0.276996000  |
| H                                                                                        | 0.833576000  | -4.090445000 | 0.307503000  |
| C                                                                                        | -1.050686000 | 2.214285000  | 0.694254000  |
| C                                                                                        | -0.058976000 | 1.810170000  | 1.641952000  |
| C                                                                                        | 1.214537000  | 1.868343000  | 0.999641000  |
| C                                                                                        | 1.007843000  | 2.303208000  | -0.346743000 |
| C                                                                                        | -0.388563000 | 2.514779000  | -0.530900000 |
| C                                                                                        | -0.301976000 | 1.552946000  | 3.103474000  |
| H                                                                                        | 0.453998000  | 0.896621000  | 3.546994000  |
| H                                                                                        | -1.285981000 | 1.110398000  | 3.295682000  |
| H                                                                                        | -0.269105000 | 2.493449000  | 3.669554000  |
| C                                                                                        | 2.551286000  | 1.672141000  | 1.656299000  |
| H                                                                                        | 2.963352000  | 2.638021000  | 1.977993000  |
| H                                                                                        | 3.281952000  | 1.213757000  | 0.983137000  |
| H                                                                                        | 2.485184000  | 1.043248000  | 2.549920000  |
| C                                                                                        | 2.081341000  | 2.648696000  | -1.334358000 |
| H                                                                                        | 1.758070000  | 2.486075000  | -2.367592000 |
| H                                                                                        | 2.989636000  | 2.062061000  | -1.172762000 |
| H                                                                                        | 2.356372000  | 3.708319000  | -1.244343000 |
| C                                                                                        | -1.023121000 | 3.079415000  | -1.769094000 |
| H                                                                                        | -0.943841000 | 4.174715000  | -1.776502000 |
| H                                                                                        | -2.088907000 | 2.839098000  | -1.836056000 |
| H                                                                                        | -0.537199000 | 2.720962000  | -2.683284000 |
| C                                                                                        | -2.502155000 | 2.451151000  | 0.993561000  |
| H                                                                                        | -2.655165000 | 3.471411000  | 1.369622000  |
| H                                                                                        | -3.132853000 | 2.339556000  | 0.105835000  |
| H                                                                                        | -2.888153000 | 1.770979000  | 1.760210000  |
| C                                                                                        | -3.026520000 | -0.771618000 | -1.252194000 |
| C                                                                                        | -4.315609000 | -1.302280000 | -1.128116000 |
| C                                                                                        | -4.794278000 | -1.695238000 | 0.113953000  |
| C                                                                                        | -3.973556000 | -1.538076000 | 1.230980000  |
| C                                                                                        | -2.712209000 | -1.001066000 | 1.038527000  |
| N                                                                                        | -2.231771000 | -0.633118000 | -0.167393000 |
| H                                                                                        | -5.794104000 | -2.107869000 | 0.213759000  |
| H                                                                                        | -4.933421000 | -1.398675000 | -2.015795000 |
| H                                                                                        | -4.304623000 | -1.814171000 | 2.226576000  |
| H                                                                                        | -2.052645000 | -0.836837000 | 1.888167000  |
| C                                                                                        | -2.504978000 | -0.359477000 | -2.597134000 |
| H                                                                                        | -2.152937000 | -1.232299000 | -3.160922000 |
| H                                                                                        | -3.296173000 | 0.110937000  | -3.188964000 |
| H                                                                                        | -1.669605000 | 0.340630000  | -2.518787000 |
| 62                                                                                       |              |              |              |
| TS1b, $E_{\text{(SCRF)}} = -1128.735015$ a.u., $\text{IF} = i1211.7546$ cm <sup>-1</sup> |              |              |              |
| Sc                                                                                       | -0.136294000 | 0.189595000  | -0.208797000 |
| N                                                                                        | 0.377030000  | -2.021599000 | 0.397403000  |
| C                                                                                        | 1.001116000  | -0.726792000 | -2.152797000 |
| H                                                                                        | 0.677526000  | -1.600096000 | -2.736197000 |

---

|   |              |              |              |
|---|--------------|--------------|--------------|
| H | 1.414708000  | -0.006688000 | -2.866797000 |
| C | 2.053820000  | -1.107081000 | -1.154597000 |
| C | 1.770627000  | -1.771984000 | 0.065903000  |
| C | 2.809731000  | -2.147673000 | 0.929903000  |
| H | 2.591937000  | -2.671375000 | 1.854003000  |
| C | 4.131528000  | -1.872259000 | 0.609003000  |
| H | 4.924932000  | -2.184451000 | 1.281703000  |
| C | 4.431821000  | -1.202456000 | -0.579397000 |
| H | 5.463719000  | -0.988545000 | -0.842497000 |
| C | 3.406717000  | -0.824667000 | -1.433197000 |
| H | 3.643712000  | -0.324465000 | -2.368297000 |
| C | 0.126433000  | -2.268102000 | 1.828203000  |
| H | 0.539843000  | -3.230797000 | 2.156603000  |
| H | -0.953167000 | -2.296814000 | 1.989403000  |
| H | 0.562424000  | -1.471297000 | 2.437003000  |
| C | -0.208658000 | -3.137105000 | -0.380797000 |
| H | -0.039459000 | -2.993504000 | -1.446897000 |
| H | -1.285157000 | -3.177817000 | -0.194797000 |
| H | 0.247251000  | -4.089401000 | -0.078897000 |
| C | -0.906217000 | 2.435287000  | 0.509303000  |
| C | -0.151012000 | 1.857695000  | 1.576703000  |
| C | 1.199890000  | 1.720110000  | 1.141403000  |
| C | 1.276984000  | 2.203011000  | -0.201997000 |
| C | -0.021119000 | 2.650597000  | -0.583897000 |
| C | -0.657709000 | 1.594990000  | 2.966203000  |
| H | -0.121200000 | 0.779695000  | 3.463903000  |
| H | -1.725806000 | 1.355978000  | 2.979603000  |
| H | -0.527818000 | 2.484491000  | 3.597003000  |
| C | 2.365394000  | 1.323622000  | 2.001203000  |
| H | 2.786684000  | 2.207127000  | 2.499603000  |
| H | 3.170299000  | 0.861830000  | 1.423403000  |
| H | 2.080801000  | 0.622119000  | 2.792403000  |
| C | 2.529183000  | 2.435724000  | -0.994097000 |
| H | 2.384084000  | 2.259123000  | -2.065897000 |
| H | 3.352189000  | 1.801232000  | -0.657497000 |
| H | 2.855872000  | 3.478927000  | -0.885897000 |
| C | -0.338727000 | 3.365293000  | -1.865497000 |
| H | 0.031962000  | 4.398097000  | -1.827097000 |
| H | -1.415528000 | 3.424981000  | -2.051397000 |
| H | 0.126978000  | 2.892598000  | -2.737897000 |
| C | -2.340122000 | 2.870871000  | 0.582703000  |
| H | -2.407833000 | 3.921771000  | 0.893803000  |
| H | -2.852821000 | 2.791667000  | -0.381897000 |
| H | -2.912416000 | 2.282966000  | 1.306103000  |
| C | -2.645086000 | -0.551032000 | -1.112297000 |
| C | -3.772178000 | -1.314243000 | -1.451397000 |
| C | -4.568172000 | -1.832752000 | -0.439697000 |
| C | -4.229175000 | -1.592148000 | 0.897203000  |
| C | -3.072482000 | -0.877435000 | 1.163103000  |
| N | -2.284488000 | -0.393328000 | 0.186903000  |

---

|                                             |              |              |              |
|---------------------------------------------|--------------|--------------|--------------|
| H                                           | -5.459666000 | -2.404061000 | -0.683697000 |
| H                                           | -4.026876000 | -1.458046000 | -2.497097000 |
| H                                           | -4.844871000 | -1.958455000 | 1.711903000  |
| H                                           | -2.753384000 | -0.681333000 | 2.183303000  |
| C                                           | -1.733893000 | 0.128178000  | -2.051997000 |
| H                                           | -1.867490000 | -0.195623000 | -3.088397000 |
| H                                           | -1.872705000 | 1.213277000  | -2.019197000 |
| H                                           | -0.326489000 | -0.278007000 | -2.059797000 |
| 62                                          |              |              |              |
| B2, $E_{\text{(SCRF)}} = -1128.764134$ a.u. |              |              |              |
| Sc                                          | -0.512642000 | 0.232571000  | -0.179143000 |
| N                                           | 0.849061000  | -1.596202000 | 0.476755000  |
| C                                           | 1.890557000  | -0.996512000 | -2.277534000 |
| H                                           | 1.866736000  | -1.954697000 | -2.814013000 |
| H                                           | 2.292364000  | -0.256214000 | -2.975949000 |
| C                                           | 2.753899000  | -1.072909000 | -1.043381000 |
| C                                           | 2.278397000  | -1.345386000 | 0.256899000  |
| C                                           | 3.180121000  | -1.395061000 | 1.327735000  |
| H                                           | 2.837675000  | -1.610606000 | 2.332634000  |
| C                                           | 4.541882000  | -1.180889000 | 1.131435000  |
| H                                           | 5.217768000  | -1.226590000 | 1.980296000  |
| C                                           | 5.023719000  | -0.922111000 | -0.147107000 |
| H                                           | 6.083591000  | -0.757732000 | -0.316814000 |
| C                                           | 4.129483000  | -0.869850000 | -1.210069000 |
| H                                           | 4.500659000  | -0.659105000 | -2.210330000 |
| C                                           | 0.469983000  | -1.664011000 | 1.905429000  |
| H                                           | 0.923678000  | -2.527632000 | 2.409020000  |
| H                                           | -0.615558000 | -1.783760000 | 1.972383000  |
| H                                           | 0.768707000  | -0.752359000 | 2.427865000  |
| C                                           | 0.441306000  | -2.883499000 | -0.149601000 |
| H                                           | 0.638351000  | -2.872728000 | -1.220151000 |
| H                                           | -0.629148000 | -3.041951000 | 0.007365000  |
| H                                           | 0.998069000  | -3.712625000 | 0.305391000  |
| C                                           | -1.411577000 | 2.508854000  | -0.120560000 |
| C                                           | -0.985697000 | 2.191205000  | 1.203725000  |
| C                                           | 0.433969000  | 2.046617000  | 1.189017000  |
| C                                           | 0.881427000  | 2.253022000  | -0.150032000 |
| C                                           | -0.261624000 | 2.536239000  | -0.961234000 |
| C                                           | -1.868919000 | 2.161680000  | 2.417953000  |
| H                                           | -1.506594000 | 1.469686000  | 3.186919000  |
| H                                           | -2.896690000 | 1.880854000  | 2.167003000  |
| H                                           | -1.915516000 | 3.154162000  | 2.885761000  |
| C                                           | 1.321679000  | 1.900522000  | 2.391949000  |
| H                                           | 1.678348000  | 2.885793000  | 2.720885000  |
| H                                           | 2.211643000  | 1.294921000  | 2.188528000  |
| H                                           | 0.794274000  | 1.461359000  | 3.245754000  |
| C                                           | 2.314194000  | 2.369332000  | -0.582817000 |
| H                                           | 2.453885000  | 2.108645000  | -1.636326000 |
| H                                           | 2.983041000  | 1.738940000  | 0.009342000  |
| H                                           | 2.656153000  | 3.406720000  | -0.465405000 |

---

|   |              |              |              |
|---|--------------|--------------|--------------|
| C | -0.226082000 | 2.928237000  | -2.410095000 |
| H | -0.080588000 | 4.011610000  | -2.513630000 |
| H | -1.154753000 | 2.676648000  | -2.931139000 |
| H | 0.593697000  | 2.441897000  | -2.948493000 |
| C | -2.818795000 | 2.843344000  | -0.520333000 |
| H | -3.081012000 | 3.854964000  | -0.183833000 |
| H | -2.952657000 | 2.826156000  | -1.605753000 |
| H | -3.552105000 | 2.157936000  | -0.081917000 |
| C | -2.554547000 | -1.155136000 | -1.047711000 |
| C | -3.301440000 | -2.318237000 | -1.321361000 |
| C | -4.026834000 | -2.916328000 | -0.304345000 |
| C | -3.999396000 | -2.373235000 | 0.990415000  |
| C | -3.198319000 | -1.270650000 | 1.219391000  |
| N | -2.473115000 | -0.695534000 | 0.238816000  |
| H | -4.635770000 | -3.792197000 | -0.512515000 |
| H | -3.336578000 | -2.699431000 | -2.337296000 |
| H | -4.580901000 | -2.805799000 | 1.797525000  |
| H | -3.114922000 | -0.822384000 | 2.206364000  |
| C | -1.744394000 | -0.366380000 | -1.977048000 |
| H | -1.516182000 | -0.866148000 | -2.919930000 |
| H | -2.213523000 | 0.603377000  | -2.181015000 |
| H | 0.839759000  | -0.726690000 | -2.099850000 |

39

C2,  $E_{\text{(SCRF)}} = -723.415195$  a.u.

|    |              |              |              |
|----|--------------|--------------|--------------|
| Sc | -0.025015000 | 0.143940000  | -0.324951000 |
| C  | 2.281063000  | 0.047798000  | -0.930444000 |
| C  | 2.093053000  | 1.207205000  | -0.113816000 |
| C  | 1.710232000  | 0.765020000  | 1.190519000  |
| C  | 1.680551000  | -0.665958000 | 1.181952000  |
| C  | 2.038584000  | -1.110873000 | -0.123977000 |
| C  | 2.314910000  | 2.632642000  | -0.537199000 |
| H  | 1.694236000  | 3.338482000  | 0.025189000  |
| H  | 2.119972000  | 2.788164000  | -1.603734000 |
| H  | 3.359001000  | 2.923434000  | -0.362662000 |
| C  | 1.461911000  | 1.644643000  | 2.384858000  |
| H  | 2.391663000  | 1.791887000  | 2.949498000  |
| H  | 0.737279000  | 1.209663000  | 3.081629000  |
| H  | 1.102873000  | 2.640605000  | 2.104283000  |
| C  | 1.394328000  | -1.545681000 | 2.364031000  |
| H  | 0.970069000  | -2.508652000 | 2.065237000  |
| H  | 0.702814000  | -1.079949000 | 3.074109000  |
| H  | 2.320036000  | -1.756007000 | 2.915331000  |
| C  | 2.234680000  | -2.534694000 | -0.551372000 |
| H  | 3.279545000  | -2.836349000 | -0.401199000 |
| H  | 2.006704000  | -2.685273000 | -1.611127000 |
| H  | 1.610906000  | -3.223294000 | 0.024834000  |
| C  | 2.744117000  | 0.040469000  | -2.360743000 |
| H  | 3.839858000  | -0.007479000 | -2.406307000 |
| H  | 2.366927000  | -0.825255000 | -2.915172000 |
| H  | 2.445999000  | 0.944339000  | -2.902742000 |

---

|                                             |              |              |              |
|---------------------------------------------|--------------|--------------|--------------|
| C                                           | -2.387897000 | -0.805668000 | -0.388841000 |
| C                                           | -3.611869000 | -1.156150000 | 0.209466000  |
| C                                           | -4.587264000 | -0.187041000 | 0.378598000  |
| C                                           | -4.342077000 | 1.135947000  | -0.021080000 |
| C                                           | -3.102121000 | 1.444604000  | -0.544420000 |
| N                                           | -2.140688000 | 0.509254000  | -0.707507000 |
| H                                           | -5.550178000 | -0.454910000 | 0.804996000  |
| H                                           | -3.791271000 | -2.190405000 | 0.485274000  |
| H                                           | -5.098336000 | 1.906407000  | 0.082985000  |
| H                                           | -2.847633000 | 2.456255000  | -0.849443000 |
| C                                           | -1.232645000 | -1.674388000 | -0.627848000 |
| H                                           | -1.260807000 | -2.646877000 | -0.139100000 |
| H                                           | -1.026853000 | -1.799552000 | -1.703482000 |
| 76                                          |              |              |              |
| A3, $E_{\text{(SCRF)}} = -1416.256088$ a.u. |              |              |              |
| Sc                                          | -0.345052000 | 0.241645000  | -0.290517000 |
| N                                           | 0.712318000  | -2.200242000 | 0.460666000  |
| C                                           | 0.520506000  | -0.876751000 | -2.017398000 |
| H                                           | -0.285231000 | -1.621371000 | -2.119382000 |
| H                                           | 0.622075000  | -0.395525000 | -2.993095000 |
| C                                           | 1.798787000  | -1.512275000 | -1.609973000 |
| C                                           | 1.920734000  | -2.137623000 | -0.348791000 |
| C                                           | 3.140254000  | -2.663772000 | 0.077795000  |
| H                                           | 3.224097000  | -3.153255000 | 1.043371000  |
| C                                           | 4.274848000  | -2.560043000 | -0.727705000 |
| H                                           | 5.220725000  | -2.968911000 | -0.383976000 |
| C                                           | 4.179163000  | -1.940948000 | -1.972068000 |
| H                                           | 5.053263000  | -1.863763000 | -2.613506000 |
| C                                           | 2.956394000  | -1.431291000 | -2.402704000 |
| H                                           | 2.884198000  | -0.959651000 | -3.380591000 |
| C                                           | -0.075855000 | -3.381272000 | 0.051322000  |
| H                                           | -0.264315000 | -3.356175000 | -1.022876000 |
| H                                           | -1.028256000 | -3.399063000 | 0.588839000  |
| H                                           | 0.472451000  | -4.307721000 | 0.276909000  |
| C                                           | -1.723799000 | 2.336439000  | 0.058364000  |
| C                                           | -0.410207000 | 2.781145000  | -0.263162000 |
| C                                           | -0.118209000 | 2.361903000  | -1.593422000 |
| C                                           | -1.273026000 | 1.704575000  | -2.114042000 |
| C                                           | -2.264402000 | 1.693647000  | -1.096419000 |
| C                                           | 0.419724000  | 3.725212000  | 0.555175000  |
| H                                           | 1.492747000  | 3.603433000  | 0.379137000  |
| H                                           | 0.244275000  | 3.617772000  | 1.629988000  |
| H                                           | 0.169520000  | 4.762911000  | 0.296182000  |
| C                                           | 1.101532000  | 2.724811000  | -2.389813000 |
| H                                           | 1.940890000  | 3.011871000  | -1.749035000 |
| H                                           | 0.896270000  | 3.581900000  | -3.045390000 |
| H                                           | 1.436829000  | 1.903720000  | -3.032861000 |
| C                                           | -1.478515000 | 1.327370000  | -3.551469000 |
| H                                           | -2.110665000 | 0.442064000  | -3.679428000 |
| H                                           | -0.532681000 | 1.131295000  | -4.063367000 |



---

|   |              |              |              |
|---|--------------|--------------|--------------|
| H | -1.969810000 | 2.148565000  | -4.091129000 |
| C | -3.715355000 | 1.357309000  | -1.275147000 |
| H | -4.294637000 | 2.279291000  | -1.422830000 |
| H | -4.148080000 | 0.851468000  | -0.405338000 |
| H | -3.892109000 | 0.733257000  | -2.155385000 |
| C | -2.534486000 | 2.727550000  | 1.261526000  |
| H | -3.209175000 | 3.558910000  | 1.014260000  |
| H | -3.169413000 | 1.912392000  | 1.627745000  |
| H | -1.912419000 | 3.072219000  | 2.093723000  |
| C | -3.122553000 | -1.743265000 | -0.192133000 |
| C | -4.170809000 | -2.378591000 | 0.484997000  |
| C | -4.316420000 | -2.228921000 | 1.856895000  |
| C | -3.401784000 | -1.427309000 | 2.537476000  |
| C | -2.392096000 | -0.826269000 | 1.802730000  |
| N | -2.233108000 | -0.970735000 | 0.472784000  |
| H | -5.129317000 | -2.719699000 | 2.384342000  |
| H | -4.868172000 | -2.987891000 | -0.082000000 |
| H | -3.469576000 | -1.263330000 | 3.607937000  |
| H | -1.672846000 | -0.185326000 | 2.302764000  |
| C | -2.972568000 | -1.939015000 | -1.670624000 |
| H | -2.431761000 | -2.868454000 | -1.886039000 |
| H | -3.952775000 | -2.018322000 | -2.149908000 |
| H | -2.425455000 | -1.116325000 | -2.132794000 |
| C | 0.966887000  | -2.317028000 | 1.901234000  |
| H | 0.016499000  | -2.216672000 | 2.436121000  |
| H | 1.391128000  | -3.294059000 | 2.176646000  |
| H | 1.655889000  | -1.536058000 | 2.227230000  |
| C | 1.634913000  | 1.196511000  | 2.375639000  |
| C | 2.863810000  | 1.592646000  | 2.907135000  |
| C | 3.987708000  | 1.664073000  | 2.091736000  |
| C | 3.850915000  | 1.342300000  | 0.745777000  |
| C | 2.600394000  | 0.953284000  | 0.286184000  |
| N | 1.507263000  | 0.865930000  | 1.069356000  |
| H | 4.946573000  | 1.972105000  | 2.498867000  |
| H | 2.926597000  | 1.848112000  | 3.960402000  |
| H | 4.688005000  | 1.382112000  | 0.057319000  |
| C | 0.424600000  | 1.121921000  | 3.258488000  |
| H | 0.582670000  | 1.675511000  | 4.187846000  |
| H | -0.450528000 | 1.549319000  | 2.759251000  |
| H | 0.199776000  | 0.084122000  | 3.533604000  |
| H | 2.467023000  | 0.692056000  | -0.757959000 |

76

TS1c,  $E_{(\text{SCRF})} = -1416.212011$  a.u., IF =  $i1304.0366$  cm<sup>-1</sup>

|    |              |              |              |
|----|--------------|--------------|--------------|
| Sc | 0.464627000  | -0.328035000 | -0.303316000 |
| N  | -1.576147000 | 1.863925000  | 0.483998000  |
| C  | -1.336629000 | 0.205094000  | -1.788003000 |
| H  | -0.615189000 | 1.013331000  | -2.010615000 |
| H  | -1.410192000 | -0.407019000 | -2.689196000 |
| C  | -2.668381000 | 0.762678000  | -1.403648000 |
| C  | -2.795286000 | 1.516663000  | -0.222551000 |

---

|   |              |              |              |
|---|--------------|--------------|--------------|
| C | -4.053515000 | 1.948205000  | 0.203981000  |
| H | -4.151822000 | 2.540723000  | 1.109192000  |
| C | -5.197002000 | 1.624179000  | -0.524129000 |
| H | -6.170540000 | 1.960755000  | -0.178779000 |
| C | -5.082918000 | 0.878388000  | -1.695390000 |
| H | -5.968092000 | 0.626459000  | -2.272975000 |
| C | -3.828455000 | 0.454033000  | -2.126043000 |
| H | -3.740261000 | -0.133370000 | -3.037493000 |
| C | -1.130224000 | 3.191227000  | 0.033804000  |
| H | -1.007268000 | 3.192513000  | -1.052340000 |
| H | -0.176918000 | 3.443809000  | 0.507710000  |
| H | -1.863548000 | 3.972112000  | 0.290040000  |
| C | 2.405433000  | -1.852103000 | -0.235555000 |
| C | 1.273145000  | -2.674238000 | -0.489894000 |
| C | 0.747004000  | -2.318251000 | -1.763748000 |
| C | 1.576414000  | -1.295236000 | -2.316718000 |
| C | 2.607484000  | -1.013643000 | -1.374849000 |
| C | 0.802727000  | -3.823213000 | 0.349619000  |
| H | -0.277456000 | -3.978543000 | 0.266189000  |
| H | 1.039345000  | -3.688039000 | 1.409264000  |
| H | 1.288990000  | -4.753758000 | 0.027299000  |
| C | -0.359142000 | -3.040824000 | -2.475181000 |
| H | -1.213330000 | -3.246185000 | -1.820436000 |
| H | -0.003284000 | -4.009076000 | -2.851926000 |
| H | -0.725924000 | -2.479226000 | -3.338851000 |
| C | 1.486877000  | -0.773389000 | -3.722661000 |
| H | 2.098520000  | 0.121867000  | -3.870669000 |
| H | 0.461944000  | -0.527583000 | -4.020608000 |
| H | 1.852751000  | -1.525478000 | -4.434014000 |
| C | 3.840628000  | -0.191513000 | -1.609326000 |
| H | 4.674661000  | -0.844021000 | -1.901227000 |
| H | 4.162348000  | 0.350388000  | -0.713686000 |
| H | 3.713871000  | 0.535742000  | -2.415930000 |
| C | 3.353662000  | -1.971966000 | 0.922111000  |
| H | 4.238553000  | -2.558766000 | 0.640141000  |
| H | 3.720336000  | -0.998369000 | 1.267744000  |
| H | 2.894896000  | -2.482835000 | 1.774002000  |
| C | 2.275005000  | 2.536291000  | -0.388291000 |
| C | 3.106324000  | 3.500735000  | 0.191640000  |
| C | 3.432686000  | 3.424803000  | 1.538804000  |
| C | 2.918542000  | 2.370445000  | 2.291406000  |
| C | 2.103089000  | 1.449219000  | 1.652821000  |
| N | 1.778069000  | 1.515209000  | 0.345274000  |
| H | 4.078644000  | 4.170598000  | 1.993236000  |
| H | 3.491303000  | 4.306031000  | -0.426864000 |
| H | 3.144973000  | 2.259002000  | 3.346687000  |
| H | 1.685452000  | 0.610678000  | 2.200929000  |
| C | 1.903534000  | 2.648226000  | -1.837299000 |
| H | 1.114494000  | 3.396054000  | -1.977946000 |
| H | 2.761591000  | 2.971184000  | -2.434631000 |

---

|   |              |              |              |
|---|--------------|--------------|--------------|
| H | 1.546704000  | 1.698606000  | -2.242605000 |
| C | -1.724823000 | 1.877349000  | 1.941590000  |
| H | -0.733162000 | 1.968181000  | 2.397797000  |
| H | -2.332844000 | 2.720684000  | 2.304547000  |
| H | -2.186288000 | 0.946489000  | 2.277105000  |
| C | -0.556496000 | -1.540859000 | 2.837152000  |
| C | -1.718184000 | -2.227429000 | 3.190589000  |
| C | -2.709333000 | -2.459042000 | 2.236195000  |
| C | -2.526155000 | -2.006374000 | 0.932114000  |
| C | -1.344724000 | -1.330543000 | 0.633326000  |
| N | -0.407983000 | -1.104151000 | 1.568387000  |
| H | -3.615501000 | -2.991236000 | 2.514421000  |
| H | -1.841823000 | -2.577400000 | 4.210975000  |
| H | -3.283348000 | -2.161683000 | 0.169876000  |
| C | 0.524346000  | -1.250032000 | 3.836498000  |
| H | 0.412485000  | -1.871277000 | 4.728984000  |
| H | 1.516319000  | -1.435653000 | 3.413071000  |
| H | 0.484056000  | -0.202150000 | 4.160969000  |
| H | -1.333983000 | -0.682983000 | -0.643547000 |

76

B3,  $E_{\text{(SCRF)}} = -1416.231362$  a.u.

|    |              |              |              |
|----|--------------|--------------|--------------|
| Sc | 1.672025000  | -0.194693000 | -0.021296000 |
| N  | -4.009903000 | 1.672135000  | -0.001361000 |
| C  | -3.663320000 | 0.429873000  | -2.622573000 |
| H  | -4.446908000 | 0.913468000  | -3.221134000 |
| H  | -3.137578000 | -0.258605000 | -3.292781000 |
| C  | -4.227116000 | -0.308480000 | -1.437483000 |
| C  | -4.386642000 | 0.306743000  | -0.172374000 |
| C  | -4.884315000 | -0.454307000 | 0.895379000  |
| H  | -5.022224000 | 0.007082000  | 1.868095000  |
| C  | -5.230977000 | -1.793931000 | 0.731795000  |
| H  | -5.630189000 | -2.352099000 | 1.575105000  |
| C  | -5.087815000 | -2.400486000 | -0.512669000 |
| H  | -5.362345000 | -3.441728000 | -0.657784000 |
| C  | -4.586807000 | -1.652691000 | -1.577139000 |
| H  | -4.462848000 | -2.124282000 | -2.550211000 |
| C  | -4.908013000 | 2.627220000  | -0.650220000 |
| H  | -5.102891000 | 2.337034000  | -1.683434000 |
| H  | -4.442310000 | 3.619486000  | -0.656298000 |
| H  | -5.876956000 | 2.703939000  | -0.128613000 |
| C  | 3.972786000  | -0.348324000 | -0.808145000 |
| C  | 3.460727000  | -1.678404000 | -0.711586000 |
| C  | 2.414894000  | -1.818675000 | -1.673664000 |
| C  | 2.275954000  | -0.574652000 | -2.356191000 |
| C  | 3.241874000  | 0.336193000  | -1.825569000 |
| C  | 4.007350000  | -2.781008000 | 0.149663000  |
| H  | 3.224409000  | -3.474475000 | 0.472553000  |
| H  | 4.506244000  | -2.397309000 | 1.045608000  |
| H  | 4.752481000  | -3.369243000 | -0.402200000 |
| C  | 1.677516000  | -3.086316000 | -1.991820000 |

---

|                                             |              |              |              |
|---------------------------------------------|--------------|--------------|--------------|
| H                                           | 1.519038000  | -3.704910000 | -1.103146000 |
| H                                           | 2.245771000  | -3.690866000 | -2.711659000 |
| H                                           | 0.697357000  | -2.887616000 | -2.434732000 |
| C                                           | 1.347625000  | -0.317467000 | -3.509795000 |
| H                                           | 1.199743000  | 0.751813000  | -3.691952000 |
| H                                           | 0.362573000  | -0.772979000 | -3.359636000 |
| H                                           | 1.757890000  | -0.741355000 | -4.435792000 |
| C                                           | 3.525490000  | 1.722743000  | -2.329904000 |
| H                                           | 4.280552000  | 1.698810000  | -3.126710000 |
| H                                           | 3.912084000  | 2.379141000  | -1.543224000 |
| H                                           | 2.635693000  | 2.201676000  | -2.751629000 |
| C                                           | 5.143944000  | 0.202291000  | -0.044449000 |
| H                                           | 6.084353000  | -0.015726000 | -0.567801000 |
| H                                           | 5.091246000  | 1.290671000  | 0.066891000  |
| H                                           | 5.234593000  | -0.236877000 | 0.955658000  |
| C                                           | 0.629215000  | 2.832711000  | 0.182500000  |
| C                                           | 0.529077000  | 4.132806000  | 0.684763000  |
| C                                           | 1.365189000  | 4.543452000  | 1.715705000  |
| C                                           | 2.300001000  | 3.645180000  | 2.231269000  |
| C                                           | 2.351781000  | 2.374456000  | 1.683739000  |
| N                                           | 1.541352000  | 1.971537000  | 0.684380000  |
| H                                           | 1.293419000  | 5.552637000  | 2.111175000  |
| H                                           | -0.204288000 | 4.811639000  | 0.260566000  |
| H                                           | 2.975361000  | 3.922556000  | 3.033528000  |
| H                                           | 3.070853000  | 1.643670000  | 2.048317000  |
| C                                           | -0.281259000 | 2.341601000  | -0.904139000 |
| H                                           | -1.231495000 | 1.970076000  | -0.496294000 |
| H                                           | -0.521130000 | 3.147270000  | -1.604646000 |
| H                                           | 0.173271000  | 1.533273000  | -1.491553000 |
| C                                           | -3.729874000 | 2.088234000  | 1.362744000  |
| H                                           | -3.252644000 | 3.075019000  | 1.337846000  |
| H                                           | -4.630362000 | 2.179713000  | 1.995606000  |
| H                                           | -3.043224000 | 1.381292000  | 1.838605000  |
| C                                           | 0.716669000  | -2.102312000 | 2.666797000  |
| C                                           | -0.483817000 | -2.777744000 | 2.855620000  |
| C                                           | -1.482801000 | -2.710466000 | 1.876614000  |
| C                                           | -1.275729000 | -1.976202000 | 0.713997000  |
| C                                           | -0.054543000 | -1.313228000 | 0.546874000  |
| N                                           | 0.884080000  | -1.398172000 | 1.525083000  |
| H                                           | -2.423498000 | -3.233034000 | 2.030509000  |
| H                                           | -0.639168000 | -3.351164000 | 3.764713000  |
| H                                           | -2.050816000 | -1.913174000 | -0.043944000 |
| C                                           | 1.829905000  | -2.104925000 | 3.671634000  |
| H                                           | 1.607805000  | -2.771346000 | 4.508958000  |
| H                                           | 2.769355000  | -2.431884000 | 3.212403000  |
| H                                           | 1.991426000  | -1.098107000 | 4.076402000  |
| H                                           | -2.967676000 | 1.213266000  | -2.305102000 |
| 53                                          |              |              |              |
| C3, $E_{(\text{SCRF})} = -1010.912364$ a.u. |              |              |              |
| Sc                                          | 0.096023000  | 0.164218000  | -0.102949000 |

---

|   |              |              |              |
|---|--------------|--------------|--------------|
| C | -0.214648000 | 2.186502000  | 1.218592000  |
| C | 1.191719000  | 1.977166000  | 1.072644000  |
| C | 1.517232000  | 2.125584000  | -0.309713000 |
| C | 0.312603000  | 2.410080000  | -1.017945000 |
| C | -0.759197000 | 2.456585000  | -0.072124000 |
| C | 2.175250000  | 1.785040000  | 2.192004000  |
| H | 3.049499000  | 1.206982000  | 1.876931000  |
| H | 1.729635000  | 1.276597000  | 3.053754000  |
| H | 2.543838000  | 2.754821000  | 2.551699000  |
| C | 2.897453000  | 2.091849000  | -0.896884000 |
| H | 3.558403000  | 1.408221000  | -0.355335000 |
| H | 3.356720000  | 3.088568000  | -0.854709000 |
| H | 2.888389000  | 1.780691000  | -1.945406000 |
| C | 0.216390000  | 2.715343000  | -2.486029000 |
| H | -0.791590000 | 2.549042000  | -2.879320000 |
| H | 0.910785000  | 2.111964000  | -3.080000000 |
| H | 0.460864000  | 3.768372000  | -2.677722000 |
| C | -2.181198000 | 2.849356000  | -0.356491000 |
| H | -2.322436000 | 3.926348000  | -0.195923000 |
| H | -2.895173000 | 2.333722000  | 0.294552000  |
| H | -2.469977000 | 2.647800000  | -1.393286000 |
| C | -0.967865000 | 2.229111000  | 2.518080000  |
| H | -0.945315000 | 3.241159000  | 2.943727000  |
| H | -2.023403000 | 1.963006000  | 2.396293000  |
| H | -0.534461000 | 1.564544000  | 3.274335000  |
| C | -2.666995000 | -1.170715000 | -1.000272000 |
| C | -3.869258000 | -1.867093000 | -0.873638000 |
| C | -4.353289000 | -2.186233000 | 0.390949000  |
| C | -3.622439000 | -1.803227000 | 1.514593000  |
| C | -2.435183000 | -1.115954000 | 1.317757000  |
| N | -1.963156000 | -0.803845000 | 0.095309000  |
| H | -5.288186000 | -2.728635000 | 0.498984000  |
| H | -4.415808000 | -2.153990000 | -1.766381000 |
| H | -3.960547000 | -2.031728000 | 2.519662000  |
| H | -1.832613000 | -0.797951000 | 2.165839000  |
| C | -2.107574000 | -0.777292000 | -2.336427000 |
| H | -1.033133000 | -1.000748000 | -2.404917000 |
| H | -2.603139000 | -1.312877000 | -3.149999000 |
| H | -2.250248000 | 0.296071000  | -2.515944000 |
| C | 2.334979000  | -2.265019000 | 0.828732000  |
| C | 3.182208000  | -3.014537000 | 0.019650000  |
| C | 3.168563000  | -2.825633000 | -1.367434000 |
| C | 2.310110000  | -1.889929000 | -1.934811000 |
| C | 1.470781000  | -1.145802000 | -1.097878000 |
| N | 1.515819000  | -1.364399000 | 0.241517000  |
| H | 3.835045000  | -3.413824000 | -1.993870000 |
| H | 3.849684000  | -3.742543000 | 0.470662000  |
| H | 2.294131000  | -1.734727000 | -3.009993000 |
| C | 2.274643000  | -2.416511000 | 2.319160000  |
| H | 3.046590000  | -3.100434000 | 2.680687000  |

---

|                                             |              |              |              |
|---------------------------------------------|--------------|--------------|--------------|
| H                                           | 2.411273000  | -1.449318000 | 2.815215000  |
| H                                           | 1.300333000  | -2.814012000 | 2.629516000  |
| 76                                          |              |              |              |
| A4, $E_{(\text{SCRF})} = -1416.253937$ a.u. |              |              |              |
| Sc                                          | -0.321810000 | 0.223821000  | -0.301432000 |
| N                                           | 0.765405000  | -2.092771000 | 0.753177000  |
| C                                           | 0.402367000  | -1.173375000 | -1.896923000 |
| H                                           | -0.383094000 | -1.945456000 | -1.909635000 |
| H                                           | 0.470290000  | -0.798293000 | -2.921764000 |
| C                                           | 1.702019000  | -1.764397000 | -1.479994000 |
| C                                           | 1.907504000  | -2.182788000 | -0.147204000 |
| C                                           | 3.147476000  | -2.677510000 | 0.264740000  |
| H                                           | 3.301013000  | -3.006500000 | 1.287643000  |
| C                                           | 4.211864000  | -2.756152000 | -0.633690000 |
| H                                           | 5.171777000  | -3.140918000 | -0.300909000 |
| C                                           | 4.027380000  | -2.353729000 | -1.955501000 |
| H                                           | 4.845541000  | -2.421157000 | -2.667704000 |
| C                                           | 2.788261000  | -1.869038000 | -2.364676000 |
| H                                           | 2.646688000  | -1.558252000 | -3.397483000 |
| C                                           | -0.080388000 | -3.292970000 | 0.572811000  |
| H                                           | -0.392061000 | -3.389677000 | -0.467787000 |
| H                                           | -0.969131000 | -3.220184000 | 1.206071000  |
| H                                           | 0.476282000  | -4.200582000 | 0.848574000  |
| C                                           | -1.375511000 | 2.519945000  | -0.167010000 |
| C                                           | -0.176589000 | 2.680382000  | -0.924498000 |
| C                                           | -0.317196000 | 1.948554000  | -2.133778000 |
| C                                           | -1.610949000 | 1.343890000  | -2.135282000 |
| C                                           | -2.273533000 | 1.721959000  | -0.932433000 |
| C                                           | 0.910234000  | 3.664125000  | -0.608437000 |
| H                                           | 1.857475000  | 3.413135000  | -1.094380000 |
| H                                           | 1.095140000  | 3.754617000  | 0.466610000  |
| H                                           | 0.626379000  | 4.663017000  | -0.967513000 |
| C                                           | 0.609728000  | 2.006292000  | -3.311683000 |
| H                                           | 1.648156000  | 2.195158000  | -3.022127000 |
| H                                           | 0.314955000  | 2.824538000  | -3.983326000 |
| H                                           | 0.591285000  | 1.087162000  | -3.904365000 |
| C                                           | -2.226944000 | 0.640526000  | -3.310247000 |
| H                                           | -3.138925000 | 0.100036000  | -3.037682000 |
| H                                           | -1.540751000 | -0.073102000 | -3.779556000 |
| H                                           | -2.511553000 | 1.364819000  | -4.085343000 |
| C                                           | -3.729991000 | 1.530330000  | -0.628873000 |
| H                                           | -4.301907000 | 2.404206000  | -0.968981000 |
| H                                           | -3.927789000 | 1.417852000  | 0.442181000  |
| H                                           | -4.152749000 | 0.657938000  | -1.135350000 |
| C                                           | -1.729791000 | 3.315479000  | 1.057907000  |
| H                                           | -2.021279000 | 4.337763000  | 0.779579000  |
| H                                           | -2.580739000 | 2.889560000  | 1.599731000  |
| H                                           | -0.893620000 | 3.412395000  | 1.759412000  |
| C                                           | -2.902555000 | -1.039068000 | 1.662761000  |
| C                                           | -4.013143000 | -1.865967000 | 1.852469000  |

---

|   |              |              |              |
|---|--------------|--------------|--------------|
| C | -4.511704000 | -2.622273000 | 0.798541000  |
| C | -3.889358000 | -2.516893000 | -0.441060000 |
| C | -2.790340000 | -1.677790000 | -0.554563000 |
| N | -2.278318000 | -0.960937000 | 0.464986000  |
| H | -5.374308000 | -3.267120000 | 0.939731000  |
| H | -4.483332000 | -1.903143000 | 2.830200000  |
| H | -4.242490000 | -3.065760000 | -1.307877000 |
| H | -2.296037000 | -1.563441000 | -1.512923000 |
| C | -2.393169000 | -0.200295000 | 2.796842000  |
| H | -3.078661000 | -0.233984000 | 3.647382000  |
| H | -1.417448000 | -0.551194000 | 3.150429000  |
| H | -2.294237000 | 0.845969000  | 2.489190000  |
| C | 1.144902000  | -2.037275000 | 2.170935000  |
| H | 0.253500000  | -1.832069000 | 2.770566000  |
| H | 1.562164000  | -2.989839000 | 2.529406000  |
| H | 1.880071000  | -1.249523000 | 2.339960000  |
| C | 2.680898000  | 1.282030000  | 0.857438000  |
| C | 3.531599000  | 1.782688000  | 1.852177000  |
| C | 3.045053000  | 2.064541000  | 3.119551000  |
| C | 1.691314000  | 1.846990000  | 3.375329000  |
| C | 0.910109000  | 1.345132000  | 2.348348000  |
| N | 1.373925000  | 1.051636000  | 1.117012000  |
| H | 3.702291000  | 2.456471000  | 3.890557000  |
| H | 4.576188000  | 1.952487000  | 1.609078000  |
| H | 1.249160000  | 2.063622000  | 4.342232000  |
| C | 3.224656000  | 0.996260000  | -0.506182000 |
| H | 3.743497000  | 0.031106000  | -0.523553000 |
| H | 2.434690000  | 0.957621000  | -1.258574000 |
| H | 3.947464000  | 1.765762000  | -0.796380000 |
| H | -0.148176000 | 1.171607000  | 2.511634000  |

76

TS1d,  $E_{(\text{SCRF})} = -1416.201456$  a.u., IF =  $i1208.4013$  cm<sup>-1</sup>

|    |              |              |              |
|----|--------------|--------------|--------------|
| Sc | 0.668587000  | -0.326084000 | -0.294026000 |
| N  | -2.398020000 | 1.131402000  | 0.832414000  |
| C  | -1.215627000 | 0.418435000  | -1.667448000 |
| H  | -0.797280000 | 1.378376000  | -1.337612000 |
| H  | -0.948245000 | 0.266830000  | -2.716726000 |
| C  | -2.697665000 | 0.397596000  | -1.482428000 |
| C  | -3.269572000 | 0.672067000  | -0.221902000 |
| C  | -4.647384000 | 0.525018000  | -0.038083000 |
| H  | -5.092511000 | 0.744944000  | 0.927858000  |
| C  | -5.467749000 | 0.101476000  | -1.082732000 |
| H  | -6.536112000 | -0.009903000 | -0.919370000 |
| C  | -4.912813000 | -0.164152000 | -2.331609000 |
| H  | -5.542648000 | -0.488067000 | -3.155522000 |
| C  | -3.540935000 | -0.016425000 | -2.521529000 |
| H  | -3.107047000 | -0.233106000 | -3.495532000 |
| C  | -2.269594000 | 2.591756000  | 0.781763000  |
| H  | -1.949091000 | 2.910027000  | -0.213699000 |
| H  | -1.526105000 | 2.924710000  | 1.513824000  |

---

|   |              |              |              |
|---|--------------|--------------|--------------|
| H | -3.225116000 | 3.095075000  | 1.004806000  |
| C | 2.955735000  | -1.231703000 | -0.444176000 |
| C | 2.130983000  | -2.100880000 | -1.215255000 |
| C | 1.635476000  | -1.363595000 | -2.327202000 |
| C | 2.171280000  | -0.042330000 | -2.255563000 |
| C | 2.997073000  | 0.035134000  | -1.094435000 |
| C | 1.969963000  | -3.574750000 | -0.981554000 |
| H | 1.212206000  | -4.013057000 | -1.637797000 |
| H | 1.699775000  | -3.814157000 | 0.053260000  |
| H | 2.911582000  | -4.096792000 | -1.196283000 |
| C | 0.840898000  | -1.918758000 | -3.473397000 |
| H | 0.038000000  | -2.590065000 | -3.149987000 |
| H | 1.490273000  | -2.495665000 | -4.145265000 |
| H | 0.385224000  | -1.125823000 | -4.073504000 |
| C | 2.053676000  | 0.989935000  | -3.341923000 |
| H | 2.510211000  | 1.941151000  | -3.053160000 |
| H | 1.016803000  | 1.188684000  | -3.639287000 |
| H | 2.578755000  | 0.652731000  | -4.244837000 |
| C | 3.921299000  | 1.156648000  | -0.720689000 |
| H | 4.930644000  | 0.958262000  | -1.105186000 |
| H | 4.011911000  | 1.278846000  | 0.363971000  |
| H | 3.604741000  | 2.118147000  | -1.134037000 |
| C | 3.791904000  | -1.643489000 | 0.731635000  |
| H | 4.793295000  | -1.953803000 | 0.403097000  |
| H | 3.939882000  | -0.827707000 | 1.448951000  |
| H | 3.354224000  | -2.493070000 | 1.264370000  |
| C | 1.288864000  | 2.356033000  | 1.781717000  |
| C | 1.480664000  | 3.710631000  | 2.067600000  |
| C | 1.449334000  | 4.652988000  | 1.047028000  |
| C | 1.232852000  | 4.209605000  | -0.253779000 |
| C | 1.054297000  | 2.850000000  | -0.462278000 |
| N | 1.066271000  | 1.925366000  | 0.518200000  |
| H | 1.595122000  | 5.707633000  | 1.262316000  |
| H | 1.654765000  | 4.013338000  | 3.095358000  |
| H | 1.204194000  | 4.894096000  | -1.095143000 |
| H | 0.902183000  | 2.480777000  | -1.471000000 |
| C | 1.350070000  | 1.338711000  | 2.878303000  |
| H | 1.406406000  | 1.818028000  | 3.858779000  |
| H | 0.471974000  | 0.686946000  | 2.865931000  |
| H | 2.241789000  | 0.710427000  | 2.766022000  |
| C | -2.801261000 | 0.720031000  | 2.174364000  |
| H | -1.999093000 | 0.969658000  | 2.877436000  |
| H | -3.714755000 | 1.222147000  | 2.534054000  |
| H | -2.963985000 | -0.360147000 | 2.200988000  |
| C | -0.783950000 | -2.266581000 | 1.110934000  |
| C | -1.585243000 | -2.967335000 | 2.026150000  |
| C | -1.118640000 | -3.178250000 | 3.314495000  |
| C | 0.138978000  | -2.681858000 | 3.678671000  |
| C | 0.850444000  | -1.946660000 | 2.746997000  |
| N | 0.390973000  | -1.712161000 | 1.502496000  |



---

|   |              |              |              |
|---|--------------|--------------|--------------|
| H | -1.711679000 | -3.744851000 | 4.027388000  |
| H | -2.537970000 | -3.371112000 | 1.697365000  |
| H | 0.552421000  | -2.855805000 | 4.666552000  |
| C | -1.075393000 | -2.079267000 | -0.321161000 |
| H | -2.135535000 | -2.217938000 | -0.552177000 |
| H | -1.057505000 | -0.814216000 | -0.982676000 |
| H | -0.503650000 | -2.795640000 | -0.918409000 |
| H | 1.819255000  | -1.524598000 | 2.992577000  |

76

B4,  $E_{(\text{SCRF})} = -1416.238509$  a.u.

|    |              |              |              |
|----|--------------|--------------|--------------|
| Sc | -1.800671000 | -0.149786000 | -0.105892000 |
| N  | 5.105821000  | 0.791163000  | 0.243440000  |
| C  | 4.458404000  | -1.878924000 | 1.271158000  |
| H  | 4.465304000  | -1.034588000 | 1.968052000  |
| H  | 5.440892000  | -2.364212000 | 1.341000000  |
| C  | 4.142764000  | -1.437551000 | -0.134830000 |
| C  | 4.462578000  | -0.143163000 | -0.616712000 |
| C  | 4.091447000  | 0.203212000  | -1.925983000 |
| H  | 4.338720000  | 1.186415000  | -2.313177000 |
| C  | 3.438384000  | -0.701860000 | -2.760201000 |
| H  | 3.185467000  | -0.408924000 | -3.776173000 |
| C  | 3.145292000  | -1.982634000 | -2.300887000 |
| H  | 2.658675000  | -2.706454000 | -2.948981000 |
| C  | 3.497507000  | -2.330136000 | -0.997374000 |
| H  | 3.270356000  | -3.329411000 | -0.629858000 |
| C  | 6.488743000  | 0.458857000  | 0.591686000  |
| H  | 6.576850000  | -0.584212000 | 0.894713000  |
| H  | 6.812347000  | 1.086540000  | 1.429066000  |
| H  | 7.174485000  | 0.628043000  | -0.254850000 |
| C  | -3.606723000 | -1.586082000 | 0.687639000  |
| C  | -3.230045000 | -2.051090000 | -0.608142000 |
| C  | -1.893749000 | -2.547840000 | -0.530864000 |
| C  | -1.446970000 | -2.389365000 | 0.814853000  |
| C  | -2.506101000 | -1.803526000 | 1.570993000  |
| C  | -4.120045000 | -2.094117000 | -1.816596000 |
| H  | -3.552578000 | -2.043128000 | -2.751270000 |
| H  | -4.845516000 | -1.274642000 | -1.825881000 |
| H  | -4.691145000 | -3.031811000 | -1.840276000 |
| C  | -1.138764000 | -3.243027000 | -1.625987000 |
| H  | -1.474028000 | -2.930639000 | -2.619597000 |
| H  | -1.286582000 | -4.329492000 | -1.564300000 |
| H  | -0.061756000 | -3.056342000 | -1.567959000 |
| C  | -0.137174000 | -2.871721000 | 1.368137000  |
| H  | 0.157769000  | -2.320581000 | 2.266985000  |
| H  | 0.677194000  | -2.790084000 | 0.640049000  |
| H  | -0.206068000 | -3.931008000 | 1.650691000  |
| C  | -2.499033000 | -1.600014000 | 3.059731000  |
| H  | -2.635988000 | -2.558532000 | 3.577165000  |
| H  | -3.311857000 | -0.946517000 | 3.391467000  |
| H  | -1.556368000 | -1.175084000 | 3.422994000  |

---

|   |              |              |              |
|---|--------------|--------------|--------------|
| C | -4.964020000 | -1.062296000 | 1.065552000  |
| H | -5.643362000 | -1.887404000 | 1.316931000  |
| H | -4.930725000 | -0.404177000 | 1.940838000  |
| H | -5.432171000 | -0.504942000 | 0.247152000  |
| C | -0.714456000 | 1.771779000  | 2.281719000  |
| C | 0.263016000  | 2.378850000  | 3.069401000  |
| C | 1.607340000  | 2.107414000  | 2.833264000  |
| C | 1.957630000  | 1.229172000  | 1.809403000  |
| C | 0.934648000  | 0.650584000  | 1.072109000  |
| N | -0.370068000 | 0.906794000  | 1.300639000  |
| H | 2.374261000  | 2.577902000  | 3.442274000  |
| H | -0.036423000 | 3.062172000  | 3.858052000  |
| H | 2.994585000  | 0.994947000  | 1.578996000  |
| H | 1.160578000  | -0.042509000 | 0.264410000  |
| C | -2.172511000 | 2.082177000  | 2.457178000  |
| H | -2.378884000 | 2.468227000  | 3.458950000  |
| H | -2.494316000 | 2.844548000  | 1.736445000  |
| H | -2.795945000 | 1.190936000  | 2.315421000  |
| C | 5.010809000  | 2.191050000  | -0.138919000 |
| H | 5.359747000  | 2.805375000  | 0.698260000  |
| H | 5.626060000  | 2.452341000  | -1.017375000 |
| H | 3.971178000  | 2.458006000  | -0.353126000 |
| C | -1.663987000 | 1.540843000  | -2.019635000 |
| C | -1.266809000 | 2.800242000  | -2.517643000 |
| C | -2.074313000 | 3.902304000  | -2.303513000 |
| C | -3.268393000 | 3.769831000  | -1.573935000 |
| C | -3.574032000 | 2.532248000  | -1.043313000 |
| N | -2.785691000 | 1.453482000  | -1.231860000 |
| H | -1.798325000 | 4.867524000  | -2.720111000 |
| H | -0.360072000 | 2.872670000  | -3.110130000 |
| H | -3.932796000 | 4.613204000  | -1.419108000 |
| C | -0.958809000 | 0.273531000  | -2.144964000 |
| H | 0.058768000  | 0.328831000  | -2.530420000 |
| H | 3.723658000  | -2.612322000 | 1.620013000  |
| H | -1.546101000 | -0.471393000 | -2.693876000 |
| H | -4.467987000 | 2.373668000  | -0.445205000 |

53

C4,  $E_{\text{(SCRF)}} = -1010.915246$  a.u.

|    |              |              |              |
|----|--------------|--------------|--------------|
| Sc | -0.362730000 | 0.208585000  | -0.186691000 |
| C  | -2.278717000 | 0.043413000  | 1.310803000  |
| C  | -2.720862000 | 0.693197000  | 0.119515000  |
| C  | -2.631670000 | -0.241770000 | -0.957032000 |
| C  | -2.131746000 | -1.468505000 | -0.427740000 |
| C  | -1.918860000 | -1.296543000 | 0.973480000  |
| C  | -3.271691000 | 2.087080000  | 0.032603000  |
| H  | -3.101098000 | 2.539706000  | -0.949281000 |
| H  | -2.834030000 | 2.751892000  | 0.783824000  |
| H  | -4.357327000 | 2.082430000  | 0.197732000  |
| C  | -3.118375000 | -0.020596000 | -2.359758000 |
| H  | -3.031492000 | 1.025770000  | -2.668156000 |

---

|   |              |              |              |
|---|--------------|--------------|--------------|
| H | -4.178542000 | -0.293446000 | -2.444648000 |
| H | -2.570053000 | -0.624921000 | -3.089319000 |
| C | -1.980875000 | -2.760237000 | -1.178111000 |
| H | -1.172133000 | -3.380979000 | -0.777459000 |
| H | -1.789926000 | -2.600809000 | -2.244626000 |
| H | -2.901693000 | -3.354733000 | -1.108693000 |
| C | -1.532256000 | -2.389259000 | 1.929564000  |
| H | -2.386960000 | -3.052115000 | 2.117868000  |
| H | -1.221377000 | -1.996570000 | 2.902623000  |
| H | -0.721662000 | -3.019461000 | 1.545624000  |
| C | -2.289725000 | 0.646025000  | 2.687574000  |
| H | -3.279693000 | 0.540205000  | 3.150370000  |
| H | -1.573999000 | 0.163368000  | 3.361818000  |
| H | -2.061955000 | 1.717229000  | 2.669538000  |
| C | 2.147862000  | -1.564794000 | 0.914215000  |
| C | 3.189827000  | -2.485352000 | 0.799107000  |
| C | 3.424297000  | -3.117037000 | -0.418181000 |
| C | 2.608699000  | -2.815485000 | -1.507217000 |
| C | 1.587115000  | -1.896799000 | -1.323349000 |
| N | 1.353219000  | -1.286942000 | -0.144202000 |
| H | 4.233391000  | -3.835249000 | -0.515635000 |
| H | 3.810875000  | -2.698369000 | 1.663480000  |
| H | 2.754968000  | -3.281058000 | -2.475977000 |
| H | 0.925378000  | -1.627033000 | -2.143522000 |
| C | 1.886219000  | -0.821701000 | 2.191361000  |
| H | 2.345072000  | -1.325296000 | 3.046071000  |
| H | 2.304008000  | 0.191803000  | 2.141591000  |
| H | 0.811462000  | -0.742071000 | 2.395645000  |
| C | 0.983705000  | 2.193277000  | -1.087094000 |
| C | 2.208461000  | 2.824491000  | -1.388190000 |
| C | 2.892091000  | 3.495370000  | -0.389839000 |
| C | 2.378397000  | 3.524928000  | 0.917622000  |
| C | 1.213001000  | 2.830789000  | 1.176591000  |
| N | 0.546728000  | 2.159887000  | 0.213749000  |
| H | 3.815126000  | 4.020294000  | -0.621572000 |
| H | 2.568318000  | 2.821209000  | -2.412395000 |
| H | 2.880868000  | 4.069010000  | 1.710214000  |
| C | 0.118294000  | 1.449655000  | -1.997292000 |
| H | 0.549478000  | 1.229909000  | -2.974325000 |
| H | -0.859185000 | 1.933191000  | -2.112379000 |
| H | 0.780742000  | 2.794308000  | 2.173490000  |

16

C,  $E_{\text{(SCRF)}} = -234.4746958$  a.u.

|   |             |              |              |
|---|-------------|--------------|--------------|
| C | 2.992614000 | -0.203066000 | -0.149808000 |
| H | 3.029910000 | -1.289669000 | -0.208937000 |
| H | 3.915591000 | 0.327875000  | -0.369191000 |
| C | 1.872784000 | 0.440808000  | 0.180424000  |
| H | 1.884143000 | 1.531943000  | 0.225138000  |
| C | 0.557664000 | -0.211675000 | 0.489135000  |
| H | 0.240914000 | 0.054070000  | 1.508292000  |

---

|                                             |              |              |              |
|---------------------------------------------|--------------|--------------|--------------|
| H                                           | 0.671374000  | -1.303667000 | 0.469633000  |
| C                                           | -0.557623000 | 0.211775000  | -0.489012000 |
| H                                           | -0.240917000 | -0.053954000 | -1.508184000 |
| H                                           | -0.671295000 | 1.303772000  | -0.469526000 |
| C                                           | -1.872712000 | -0.440764000 | -0.180300000 |
| C                                           | -2.992734000 | 0.202950000  | 0.149590000  |
| H                                           | -1.883848000 | -1.531922000 | -0.224753000 |
| H                                           | -3.915610000 | -0.328186000 | 0.368899000  |
| H                                           | -3.030214000 | 1.289570000  | 0.208457000  |
| 69                                          |              |              |              |
| D1, $E_{\text{(SCRF)}} = -1245.399795$ a.u. |              |              |              |
| Sc                                          | 0.300240000  | -0.078458000 | 0.205277000  |
| C                                           | 0.029596000  | -1.419870000 | 2.275852000  |
| C                                           | 1.392641000  | -0.998445000 | 2.233203000  |
| C                                           | 1.415248000  | 0.425287000  | 2.330241000  |
| C                                           | 0.074020000  | 0.881452000  | 2.468204000  |
| C                                           | -0.784626000 | -0.251942000 | 2.414041000  |
| C                                           | 2.617158000  | -1.865105000 | 2.316847000  |
| H                                           | 3.368577000  | -1.621700000 | 1.555950000  |
| H                                           | 2.377270000  | -2.927678000 | 2.226195000  |
| H                                           | 3.102350000  | -1.732332000 | 3.292640000  |
| C                                           | 2.660986000  | 1.255653000  | 2.440850000  |
| H                                           | 3.074896000  | 1.198785000  | 3.456973000  |
| H                                           | 2.466440000  | 2.312052000  | 2.235430000  |
| H                                           | 3.450764000  | 0.917114000  | 1.759917000  |
| C                                           | -0.360226000 | 2.289368000  | 2.742562000  |
| H                                           | -1.349198000 | 2.501738000  | 2.325501000  |
| H                                           | 0.338043000  | 3.024105000  | 2.330994000  |
| H                                           | -0.417196000 | 2.467464000  | 3.824714000  |
| C                                           | -2.266635000 | -0.227073000 | 2.647712000  |
| H                                           | -2.485826000 | -0.187696000 | 3.723345000  |
| H                                           | -2.762279000 | -1.119166000 | 2.254946000  |
| H                                           | -2.740526000 | 0.646811000  | 2.189588000  |
| C                                           | -0.463132000 | -2.835148000 | 2.393062000  |
| H                                           | -0.548144000 | -3.124100000 | 3.449142000  |
| H                                           | -1.456141000 | -2.968788000 | 1.951035000  |
| H                                           | 0.209406000  | -3.560223000 | 1.922748000  |
| C                                           | 0.670639000  | 3.263397000  | -0.742893000 |
| C                                           | -0.330205000 | 4.169249000  | -1.084790000 |
| C                                           | -1.661760000 | 3.749047000  | -1.131245000 |
| C                                           | -1.980456000 | 2.430118000  | -0.824078000 |
| C                                           | -0.952776000 | 1.546702000  | -0.475466000 |
| N                                           | 0.324242000  | 1.986275000  | -0.462958000 |
| H                                           | -2.440922000 | 4.459716000  | -1.397143000 |
| H                                           | -0.067209000 | 5.198765000  | -1.310254000 |
| H                                           | -3.015078000 | 2.098129000  | -0.845041000 |
| C                                           | 2.118094000  | 3.663218000  | -0.700316000 |
| H                                           | 2.232415000  | 4.672442000  | -0.292371000 |
| H                                           | 2.702732000  | 2.974360000  | -0.085853000 |
| H                                           | 2.554172000  | 3.678908000  | -1.708139000 |

---

|   |              |              |              |
|---|--------------|--------------|--------------|
| C | -1.028662000 | -1.994968000 | -1.222266000 |
| H | -1.112592000 | -2.801691000 | -0.496228000 |
| H | -0.169003000 | -2.009752000 | -1.888705000 |
| C | -2.049897000 | -1.143380000 | -1.446730000 |
| H | -1.952082000 | -0.416569000 | -2.253705000 |
| C | -3.374139000 | -1.170795000 | -0.755823000 |
| H | -3.553424000 | -0.208605000 | -0.260483000 |
| H | -3.379767000 | -1.942815000 | 0.022822000  |
| C | -4.525062000 | -1.428544000 | -1.756153000 |
| H | -4.341893000 | -2.386641000 | -2.263145000 |
| H | -4.520737000 | -0.651857000 | -2.531612000 |
| C | -5.861490000 | -1.459869000 | -1.072825000 |
| C | -6.856392000 | -0.605203000 | -1.309270000 |
| H | -6.001547000 | -2.249898000 | -0.333068000 |
| H | -7.806249000 | -0.677835000 | -0.786729000 |
| H | -6.765930000 | 0.191781000  | -2.045481000 |
| C | 2.658586000  | -2.016657000 | -1.375907000 |
| C | 3.775837000  | -2.212000000 | -2.194021000 |
| C | 4.339566000  | -1.143557000 | -2.877097000 |
| C | 3.763542000  | 0.115893000  | -2.730167000 |
| C | 2.663133000  | 0.241613000  | -1.897679000 |
| N | 2.110972000  | -0.787621000 | -1.217022000 |
| H | 5.206808000  | -1.290544000 | -3.514493000 |
| H | 4.189683000  | -3.211455000 | -2.289255000 |
| H | 4.155249000  | 0.986208000  | -3.246099000 |
| C | 2.033017000  | -3.198390000 | -0.696762000 |
| H | 1.472375000  | -3.804693000 | -1.419374000 |
| H | 2.799260000  | -3.845990000 | -0.260229000 |
| H | 1.349170000  | -2.894582000 | 0.097383000  |
| H | 2.184970000  | 1.202956000  | -1.757392000 |

69

TS2a,  $E_{(\text{SCRF})} = -1245.38687$  a.u., IF =  $i263.2388$  cm<sup>-1</sup>

|    |              |              |             |
|----|--------------|--------------|-------------|
| Sc | 0.301818000  | -0.095436000 | 0.079238000 |
| C  | -0.068910000 | -1.362273000 | 2.169528000 |
| C  | 1.334095000  | -1.116030000 | 2.092736000 |
| C  | 1.542379000  | 0.292606000  | 2.188803000 |
| C  | 0.273678000  | 0.917338000  | 2.337452000 |
| C  | -0.724893000 | -0.101998000 | 2.322146000 |
| C  | 2.425719000  | -2.146093000 | 2.135173000 |
| H  | 3.248710000  | -1.922302000 | 1.446856000 |
| H  | 2.056056000  | -3.148861000 | 1.904131000 |
| H  | 2.859527000  | -2.194006000 | 3.142870000 |
| C  | 2.883382000  | 0.963713000  | 2.262431000 |
| H  | 3.271072000  | 0.944862000  | 3.290022000 |
| H  | 2.837542000  | 2.016615000  | 1.964050000 |
| H  | 3.630486000  | 0.467418000  | 1.633336000 |
| C  | 0.015914000  | 2.369485000  | 2.612360000 |
| H  | -0.895303000 | 2.728495000  | 2.122155000 |
| H  | 0.844324000  | 3.006633000  | 2.287485000 |
| H  | -0.112245000 | 2.539332000  | 3.689890000 |

---

|   |              |              |              |
|---|--------------|--------------|--------------|
| C | -2.173598000 | 0.119054000  | 2.649707000  |
| H | -2.298740000 | 0.258637000  | 3.732036000  |
| H | -2.799100000 | -0.730856000 | 2.365147000  |
| H | -2.580289000 | 1.011135000  | 2.161945000  |
| C | -0.721406000 | -2.712092000 | 2.266922000  |
| H | -0.743140000 | -3.059297000 | 3.308565000  |
| H | -1.757789000 | -2.695826000 | 1.915542000  |
| H | -0.191276000 | -3.476180000 | 1.688085000  |
| C | 0.090294000  | 3.208011000  | -0.889521000 |
| C | -0.990739000 | 4.074646000  | -0.984096000 |
| C | -2.288253000 | 3.570137000  | -0.879135000 |
| C | -2.485542000 | 2.207137000  | -0.707347000 |
| C | -1.371275000 | 1.364659000  | -0.618317000 |
| N | -0.131463000 | 1.881066000  | -0.708139000 |
| H | -3.139328000 | 4.244076000  | -0.936756000 |
| H | -0.818023000 | 5.135786000  | -1.133303000 |
| H | -3.494732000 | 1.814824000  | -0.655623000 |
| C | 1.501866000  | 3.703116000  | -0.992096000 |
| H | 1.529439000  | 4.795302000  | -1.017769000 |
| H | 2.102467000  | 3.373979000  | -0.136721000 |
| H | 1.980560000  | 3.337888000  | -1.908658000 |
| C | -0.854797000 | -1.509275000 | -1.285452000 |
| H | -1.045420000 | -2.440680000 | -0.753798000 |
| H | -0.214666000 | -1.594421000 | -2.163918000 |
| C | -1.895597000 | -0.550342000 | -1.317997000 |
| H | -2.018323000 | -0.002340000 | -2.253338000 |
| C | -3.192779000 | -0.899991000 | -0.623001000 |
| H | -3.711659000 | -0.035631000 | -0.203816000 |
| H | -2.976036000 | -1.568847000 | 0.217578000  |
| C | -4.147906000 | -1.610128000 | -1.607344000 |
| H | -3.633024000 | -2.483639000 | -2.031953000 |
| H | -4.378806000 | -0.939193000 | -2.445252000 |
| C | -5.419938000 | -2.040925000 | -0.936295000 |
| C | -6.633699000 | -1.581547000 | -1.240119000 |
| H | -5.314550000 | -2.783066000 | -0.142890000 |
| H | -7.522251000 | -1.930814000 | -0.721393000 |
| H | -6.788121000 | -0.848245000 | -2.029901000 |
| C | 2.778085000  | -1.868772000 | -1.435152000 |
| C | 4.001910000  | -1.973188000 | -2.105568000 |
| C | 4.758046000  | -0.839809000 | -2.370167000 |
| C | 4.275687000  | 0.396067000  | -1.945147000 |
| C | 3.056871000  | 0.427228000  | -1.287103000 |
| N | 2.307451000  | -0.664733000 | -1.033846000 |
| H | 5.707903000  | -0.918755000 | -2.891192000 |
| H | 4.350407000  | -2.954781000 | -2.412275000 |
| H | 4.828334000  | 1.314340000  | -2.114019000 |
| C | 1.974469000  | -3.106877000 | -1.168130000 |
| H | 1.397772000  | -3.395544000 | -2.055403000 |
| H | 2.634089000  | -3.944802000 | -0.923472000 |
| H | 1.274366000  | -2.963826000 | -0.343973000 |

---

|                                            |              |              |              |
|--------------------------------------------|--------------|--------------|--------------|
| H                                          | 2.651303000  | 1.369282000  | -0.935998000 |
| 69                                         |              |              |              |
| El, $E_{\text{(SCRF)}} = -1245.43191$ a.u. |              |              |              |
| Sc                                         | 0.405957000  | -0.281099000 | 0.068800000  |
| C                                          | 0.447827000  | -2.760122000 | 0.128753000  |
| C                                          | 1.693811000  | -2.321467000 | 0.664632000  |
| C                                          | 1.428943000  | -1.623826000 | 1.882179000  |
| C                                          | 0.017500000  | -1.626796000 | 2.095683000  |
| C                                          | -0.585328000 | -2.330073000 | 1.008916000  |
| C                                          | 3.063350000  | -2.677691000 | 0.162912000  |
| H                                          | 3.791364000  | -1.878889000 | 0.340784000  |
| H                                          | 3.069861000  | -2.903298000 | -0.907878000 |
| H                                          | 3.439170000  | -3.572438000 | 0.677143000  |
| C                                          | 2.491002000  | -1.147848000 | 2.833893000  |
| H                                          | 2.982697000  | -2.003758000 | 3.314758000  |
| H                                          | 2.083306000  | -0.529714000 | 3.639431000  |
| H                                          | 3.283883000  | -0.574463000 | 2.337085000  |
| C                                          | -0.714992000 | -1.138270000 | 3.314507000  |
| H                                          | -1.637720000 | -0.602776000 | 3.063236000  |
| H                                          | -0.101544000 | -0.470614000 | 3.926284000  |
| H                                          | -1.000289000 | -1.982759000 | 3.955340000  |
| C                                          | -2.025462000 | -2.735304000 | 0.910027000  |
| H                                          | -2.153399000 | -3.768040000 | 1.263183000  |
| H                                          | -2.396817000 | -2.698480000 | -0.118751000 |
| H                                          | -2.673553000 | -2.106080000 | 1.527185000  |
| C                                          | 0.239443000  | -3.655634000 | -1.057991000 |
| H                                          | 0.007712000  | -4.677359000 | -0.728965000 |
| H                                          | -0.595013000 | -3.326244000 | -1.687392000 |
| H                                          | 1.130641000  | -3.724427000 | -1.689352000 |
| C                                          | -0.261180000 | 2.615342000  | 1.525434000  |
| C                                          | -0.772018000 | 3.909554000  | 1.526711000  |
| C                                          | -1.696977000 | 4.277382000  | 0.554621000  |
| C                                          | -2.109746000 | 3.330229000  | -0.371479000 |
| C                                          | -1.582538000 | 2.037905000  | -0.326345000 |
| N                                          | -0.640000000 | 1.703246000  | 0.595899000  |
| H                                          | -2.097544000 | 5.287098000  | 0.529476000  |
| H                                          | -0.444279000 | 4.615331000  | 2.283961000  |
| H                                          | -2.846910000 | 3.574144000  | -1.130246000 |
| C                                          | 0.713025000  | 2.196775000  | 2.589827000  |
| H                                          | 0.233888000  | 2.228055000  | 3.575411000  |
| H                                          | 1.070926000  | 1.172783000  | 2.445511000  |
| H                                          | 1.576165000  | 2.870699000  | 2.634763000  |
| C                                          | -1.052511000 | -0.109276000 | -1.561739000 |
| H                                          | -1.524460000 | -1.002709000 | -1.985280000 |
| H                                          | -0.402085000 | 0.287763000  | -2.364841000 |
| C                                          | -2.109512000 | 0.961897000  | -1.249727000 |
| H                                          | -2.428372000 | 1.477387000  | -2.170500000 |
| C                                          | -3.401348000 | 0.393165000  | -0.610107000 |
| H                                          | -4.022780000 | 1.223501000  | -0.249551000 |
| H                                          | -3.128771000 | -0.196876000 | 0.275296000  |

---

|   |              |              |              |
|---|--------------|--------------|--------------|
| C | -4.250927000 | -0.455198000 | -1.567666000 |
| H | -3.658017000 | -1.304555000 | -1.935518000 |
| H | -4.516953000 | 0.145134000  | -2.447919000 |
| C | -5.498420000 | -0.968797000 | -0.908399000 |
| C | -6.741256000 | -0.662308000 | -1.279831000 |
| H | -5.349058000 | -1.637518000 | -0.058417000 |
| H | -7.607800000 | -1.065195000 | -0.762500000 |
| H | -6.940992000 | -0.003758000 | -2.123376000 |
| C | 2.847093000  | 0.155885000  | -2.119905000 |
| C | 4.025086000  | 0.731670000  | -2.606748000 |
| C | 4.709584000  | 1.671833000  | -1.849061000 |
| C | 4.204107000  | 2.021603000  | -0.597644000 |
| C | 3.035567000  | 1.411092000  | -0.174714000 |
| N | 2.359390000  | 0.501388000  | -0.906461000 |
| H | 5.624704000  | 2.121381000  | -2.223653000 |
| H | 4.394352000  | 0.431583000  | -3.582644000 |
| H | 4.703049000  | 2.745122000  | 0.038324000  |
| C | 2.095616000  | -0.841235000 | -2.949773000 |
| H | 1.450202000  | -0.332063000 | -3.676141000 |
| H | 2.787294000  | -1.473161000 | -3.514909000 |
| H | 1.459730000  | -1.489077000 | -2.340789000 |
| H | 2.618157000  | 1.652000000  | 0.798792000  |

69

D2,  $E_{\text{(SCRF)}} = -1245.395505$  a.u.

|    |              |              |              |
|----|--------------|--------------|--------------|
| Sc | -0.527638000 | -0.337333000 | -0.010027000 |
| C  | 0.151137000  | -2.714851000 | 0.201237000  |
| C  | 0.350917000  | -2.118474000 | 1.483933000  |
| C  | -0.927883000 | -1.728298000 | 1.984925000  |
| C  | -1.909225000 | -2.090447000 | 1.014141000  |
| C  | -1.243935000 | -2.703858000 | -0.085531000 |
| C  | 1.652922000  | -2.137754000 | 2.235445000  |
| H  | 1.911738000  | -3.167546000 | 2.515382000  |
| H  | 1.604717000  | -1.565379000 | 3.166348000  |
| H  | 2.494725000  | -1.753221000 | 1.648091000  |
| C  | -1.242951000 | -1.197839000 | 3.355885000  |
| H  | -1.763281000 | -1.961336000 | 3.948509000  |
| H  | -1.898309000 | -0.318178000 | 3.333933000  |
| H  | -0.340405000 | -0.928157000 | 3.910351000  |
| C  | -3.394888000 | -2.004516000 | 1.199888000  |
| H  | -3.918720000 | -1.790569000 | 0.263014000  |
| H  | -3.670515000 | -1.232129000 | 1.924245000  |
| H  | -3.789033000 | -2.956537000 | 1.580307000  |
| C  | -1.908581000 | -3.377291000 | -1.249675000 |
| H  | -2.114736000 | -4.430986000 | -1.017065000 |
| H  | -1.284534000 | -3.360278000 | -2.148516000 |
| H  | -2.862752000 | -2.906789000 | -1.503242000 |
| C  | 1.196001000  | -3.450065000 | -0.586817000 |
| H  | 1.252585000  | -4.495957000 | -0.255134000 |
| H  | 0.970344000  | -3.474032000 | -1.658096000 |
| H  | 2.196187000  | -3.024524000 | -0.458412000 |



---

|   |              |              |              |
|---|--------------|--------------|--------------|
| C | -3.581452000 | 1.173568000  | -0.594645000 |
| C | -4.293095000 | 1.240005000  | -1.789928000 |
| C | -3.779160000 | 0.630346000  | -2.939949000 |
| C | -2.557828000 | -0.035406000 | -2.888924000 |
| C | -1.866585000 | -0.080473000 | -1.672266000 |
| N | -2.401903000 | 0.517542000  | -0.587435000 |
| H | -4.339142000 | 0.685184000  | -3.870741000 |
| H | -5.242094000 | 1.766994000  | -1.822015000 |
| H | -2.148090000 | -0.508129000 | -3.777450000 |
| C | -4.059311000 | 1.804412000  | 0.679026000  |
| H | -4.336118000 | 1.038418000  | 1.412539000  |
| H | -3.271103000 | 2.418914000  | 1.127935000  |
| H | -4.934487000 | 2.435952000  | 0.505714000  |
| C | 1.548819000  | -0.206935000 | -1.951468000 |
| H | 1.630055000  | -1.277574000 | -2.124904000 |
| H | 0.755784000  | 0.312909000  | -2.485750000 |
| C | 2.481370000  | 0.463922000  | -1.250850000 |
| H | 2.388886000  | 1.548392000  | -1.171366000 |
| C | 3.712524000  | -0.120195000 | -0.634956000 |
| H | 3.701384000  | -1.213392000 | -0.704754000 |
| H | 3.752357000  | 0.141872000  | 0.432640000  |
| C | 4.994415000  | 0.418970000  | -1.313182000 |
| H | 4.982293000  | 1.518361000  | -1.270420000 |
| H | 4.986753000  | 0.141539000  | -2.373874000 |
| C | 6.236889000  | -0.102081000 | -0.651346000 |
| C | 7.140146000  | -0.884186000 | -1.241603000 |
| H | 6.384303000  | 0.192408000  | 0.389463000  |
| H | 8.024508000  | -1.231775000 | -0.714657000 |
| H | 7.036549000  | -1.197769000 | -2.278804000 |
| C | 0.741466000  | 2.432070000  | 1.623779000  |
| C | 1.054291000  | 3.793444000  | 1.695254000  |
| C | 0.750012000  | 4.635589000  | 0.634059000  |
| C | 0.132741000  | 4.094070000  | -0.491881000 |
| C | -0.151216000 | 2.737713000  | -0.493763000 |
| N | 0.141361000  | 1.908983000  | 0.531310000  |
| H | 0.991751000  | 5.693600000  | 0.682140000  |
| H | 1.536519000  | 4.178853000  | 2.588289000  |
| H | -0.125213000 | 4.703778000  | -1.351443000 |
| C | 1.043830000  | 1.523326000  | 2.774875000  |
| H | 0.170424000  | 1.431491000  | 3.431576000  |
| H | 1.309269000  | 0.520620000  | 2.430776000  |
| H | 1.869135000  | 1.911181000  | 3.378298000  |
| H | -0.635761000 | 2.283539000  | -1.353441000 |

69

TS2b,  $E_{\text{(SCRF)}} = -1245.383536$  a.u.,  $\text{IF} = i254.7922$   $\text{cm}^{-1}$

|    |              |              |             |
|----|--------------|--------------|-------------|
| Sc | -0.179693000 | -0.082515000 | 0.063163000 |
| C  | 0.406033000  | -1.382437000 | 2.076091000 |
| C  | 0.882765000  | -0.057201000 | 2.317853000 |
| C  | -0.249726000 | 0.807741000  | 2.383017000 |
| C  | -1.422090000 | 0.015896000  | 2.198430000 |

---

|   |              |              |              |
|---|--------------|--------------|--------------|
| C | -1.018862000 | -1.337783000 | 2.029737000  |
| C | 2.283036000  | 0.306162000  | 2.721083000  |
| H | 2.375580000  | 0.270961000  | 3.815072000  |
| H | 2.569513000  | 1.318241000  | 2.415291000  |
| H | 3.025990000  | -0.385245000 | 2.316561000  |
| C | -0.256498000 | 2.244776000  | 2.817689000  |
| H | -0.585714000 | 2.321955000  | 3.862717000  |
| H | -0.940131000 | 2.863422000  | 2.225096000  |
| H | 0.737904000  | 2.696420000  | 2.767320000  |
| C | -2.826847000 | 0.532248000  | 2.318596000  |
| H | -3.561728000 | -0.188958000 | 1.949321000  |
| H | -2.974684000 | 1.474808000  | 1.777453000  |
| H | -3.078615000 | 0.731052000  | 3.369105000  |
| C | -1.921157000 | -2.533311000 | 1.963004000  |
| H | -2.040358000 | -2.975776000 | 2.961012000  |
| H | -1.524132000 | -3.317471000 | 1.310691000  |
| H | -2.923012000 | -2.277500000 | 1.605918000  |
| C | 1.234444000  | -2.635059000 | 2.059918000  |
| H | 1.289158000  | -3.077585000 | 3.063760000  |
| H | 0.812365000  | -3.397395000 | 1.396387000  |
| H | 2.263837000  | -2.447707000 | 1.739329000  |
| C | -2.929269000 | -1.706310000 | -1.353613000 |
| C | -3.033281000 | -3.032687000 | -1.761267000 |
| C | -1.888171000 | -3.830215000 | -1.841075000 |
| C | -0.648285000 | -3.280551000 | -1.543892000 |
| C | -0.594637000 | -1.942355000 | -1.144138000 |
| N | -1.708527000 | -1.200010000 | -1.050491000 |
| H | -1.973833000 | -4.873410000 | -2.134802000 |
| H | -4.008384000 | -3.441631000 | -2.007125000 |
| H | 0.257222000  | -3.876038000 | -1.621875000 |
| C | -4.131613000 | -0.813978000 | -1.263940000 |
| H | -5.053245000 | -1.401241000 | -1.236516000 |
| H | -4.098524000 | -0.187227000 | -0.367772000 |
| H | -4.193402000 | -0.154219000 | -2.139307000 |
| C | 1.194184000  | -1.137779000 | -1.858795000 |
| H | 1.675193000  | -2.108097000 | -1.752020000 |
| H | 0.656453000  | -1.008497000 | -2.797059000 |
| C | 1.803819000  | -0.025580000 | -1.262697000 |
| H | 1.611687000  | 0.929861000  | -1.757965000 |
| C | 3.154517000  | -0.158700000 | -0.590025000 |
| H | 3.205823000  | -1.103463000 | -0.034206000 |
| H | 3.311927000  | 0.638959000  | 0.145408000  |
| C | 4.320862000  | -0.122980000 | -1.604009000 |
| H | 4.249121000  | 0.808360000  | -2.186521000 |
| H | 4.208109000  | -0.948292000 | -2.318861000 |
| C | 5.661191000  | -0.201226000 | -0.934259000 |
| C | 6.531534000  | -1.200355000 | -1.082276000 |
| H | 5.916034000  | 0.630173000  | -0.273888000 |
| H | 7.488589000  | -1.205918000 | -0.567670000 |
| H | 6.326390000  | -2.046304000 | -1.736347000 |

---

|   |              |             |              |
|---|--------------|-------------|--------------|
| C | 0.037792000  | 3.214347000 | -0.599112000 |
| C | -0.454727000 | 4.445860000 | -1.042504000 |
| C | -1.730835000 | 4.537015000 | -1.580929000 |
| C | -2.501583000 | 3.379602000 | -1.667268000 |
| C | -1.953893000 | 2.193191000 | -1.206784000 |
| N | -0.716042000 | 2.093017000 | -0.677709000 |
| H | -2.117499000 | 5.491446000 | -1.926619000 |
| H | 0.176085000  | 5.325834000 | -0.959531000 |
| H | -3.504844000 | 3.391719000 | -2.080127000 |
| C | 1.431724000  | 3.124300000 | -0.054500000 |
| H | 1.655917000  | 3.987420000 | 0.579559000  |
| H | 1.580136000  | 2.215544000 | 0.532384000  |
| H | 2.165167000  | 3.122734000 | -0.870475000 |
| H | -2.517130000 | 1.269073000 | -1.258733000 |

69

E2,  $E_{\text{(SCRF)}} = -1245.431343$  a.u.

|    |              |              |              |
|----|--------------|--------------|--------------|
| Sc | 0.301191000  | -0.005153000 | 0.221923000  |
| C  | -0.286314000 | 0.484549000  | 2.558720000  |
| C  | -0.326102000 | -0.933142000 | 2.431300000  |
| C  | 0.998536000  | -1.386862000 | 2.158992000  |
| C  | 1.861741000  | -0.250586000 | 2.142828000  |
| C  | 1.067910000  | 0.908467000  | 2.388377000  |
| C  | -1.507183000 | -1.807309000 | 2.736501000  |
| H  | -1.491368000 | -2.102376000 | 3.794485000  |
| H  | -1.513758000 | -2.735015000 | 2.153920000  |
| H  | -2.456192000 | -1.297312000 | 2.556950000  |
| C  | 1.452380000  | -2.817415000 | 2.100997000  |
| H  | 1.820016000  | -3.144407000 | 3.083066000  |
| H  | 2.270502000  | -2.968823000 | 1.388383000  |
| H  | 0.640233000  | -3.498283000 | 1.827352000  |
| C  | 3.361045000  | -0.325432000 | 2.071257000  |
| H  | 3.822677000  | 0.650481000  | 1.892248000  |
| H  | 3.714698000  | -1.015478000 | 1.295610000  |
| H  | 3.768710000  | -0.693564000 | 3.022202000  |
| C  | 1.560925000  | 2.307768000  | 2.627096000  |
| H  | 1.570435000  | 2.529385000  | 3.702364000  |
| H  | 0.926791000  | 3.064430000  | 2.152083000  |
| H  | 2.582826000  | 2.456512000  | 2.266343000  |
| C  | -1.422734000 | 1.369264000  | 2.978810000  |
| H  | -1.476211000 | 1.433206000  | 4.074289000  |
| H  | -1.306178000 | 2.393413000  | 2.608656000  |
| H  | -2.389925000 | 0.994289000  | 2.631657000  |
| C  | 1.556359000  | 2.812111000  | -1.084376000 |
| C  | 1.448802000  | 4.045026000  | -1.720608000 |
| C  | 0.191535000  | 4.527732000  | -2.068098000 |
| C  | -0.926550000 | 3.767363000  | -1.757002000 |
| C  | -0.771279000 | 2.544409000  | -1.102724000 |
| N  | 0.461434000  | 2.070920000  | -0.783768000 |
| H  | 0.087725000  | 5.484611000  | -2.572064000 |
| H  | 2.347147000  | 4.612895000  | -1.942052000 |

---

|   |              |              |              |
|---|--------------|--------------|--------------|
| H | -1.925298000 | 4.110765000  | -2.007550000 |
| C | 2.911952000  | 2.269263000  | -0.738451000 |
| H | 3.565643000  | 3.062780000  | -0.363260000 |
| H | 2.854094000  | 1.498521000  | 0.035917000  |
| H | 3.401512000  | 1.846861000  | -1.625262000 |
| C | -1.973859000 | 1.736108000  | -0.698869000 |
| H | -2.312786000 | 2.119604000  | 0.277534000  |
| H | -2.786172000 | 1.987535000  | -1.397854000 |
| C | -1.734699000 | 0.225305000  | -0.581123000 |
| H | -1.439456000 | -0.126276000 | -1.600949000 |
| C | -3.015123000 | -0.506359000 | -0.175590000 |
| H | -3.408099000 | -0.060670000 | 0.749284000  |
| H | -2.794739000 | -1.551651000 | 0.078905000  |
| C | -4.150852000 | -0.506051000 | -1.222255000 |
| H | -3.759528000 | -0.929409000 | -2.161643000 |
| H | -4.462889000 | 0.520824000  | -1.449779000 |
| C | -5.343993000 | -1.297027000 | -0.771745000 |
| C | -6.558966000 | -0.795043000 | -0.549334000 |
| H | -5.174761000 | -2.363072000 | -0.604130000 |
| H | -7.383017000 | -1.417752000 | -0.211416000 |
| H | -6.779255000 | 0.259723000  | -0.705841000 |
| C | 0.773071000  | -2.741114000 | -1.558514000 |
| C | 1.464119000  | -3.616199000 | -2.400816000 |
| C | 2.743505000  | -3.299013000 | -2.839187000 |
| C | 3.319157000  | -2.102768000 | -2.415988000 |
| C | 2.579932000  | -1.284275000 | -1.577589000 |
| N | 1.334303000  | -1.577881000 | -1.153512000 |
| H | 3.285232000  | -3.975454000 | -3.494025000 |
| H | 0.988174000  | -4.543518000 | -2.703916000 |
| H | 4.318496000  | -1.810381000 | -2.720582000 |
| C | -0.615613000 | -3.056728000 | -1.095751000 |
| H | -0.802474000 | -4.133649000 | -1.121280000 |
| H | -0.786238000 | -2.708129000 | -0.072028000 |
| H | -1.360116000 | -2.574188000 | -1.740137000 |
| H | 3.002170000  | -0.351742000 | -1.218062000 |

55

D3,  $E_{\text{(SCRF)}} = -957.9035714$  a.u.

|    |             |              |              |
|----|-------------|--------------|--------------|
| Sc | 0.435540000 | -0.213951000 | -0.229713000 |
| C  | 1.174237000 | -2.333188000 | 0.709732000  |
| C  | 1.858459000 | -2.173958000 | -0.531906000 |
| C  | 2.705957000 | -1.025597000 | -0.422977000 |
| C  | 2.558050000 | -0.490195000 | 0.890262000  |
| C  | 1.597413000 | -1.285048000 | 1.587228000  |
| C  | 1.827151000 | -3.117043000 | -1.700917000 |
| H  | 1.905928000 | -2.598585000 | -2.663200000 |
| H  | 0.920052000 | -3.728823000 | -1.720996000 |
| H  | 2.675090000 | -3.812626000 | -1.649905000 |
| C  | 3.668676000 | -0.555939000 | -1.477440000 |
| H  | 4.586199000 | -1.158624000 | -1.456623000 |
| H  | 3.968304000 | 0.485354000  | -1.326906000 |

---

|   |              |              |              |
|---|--------------|--------------|--------------|
| H | 3.258631000  | -0.643775000 | -2.490381000 |
| C | 3.326316000  | 0.659185000  | 1.472469000  |
| H | 2.733860000  | 1.220693000  | 2.200950000  |
| H | 3.663076000  | 1.362444000  | 0.705086000  |
| H | 4.221583000  | 0.294125000  | 1.992534000  |
| C | 1.203352000  | -1.131223000 | 3.028238000  |
| H | 1.849581000  | -1.742823000 | 3.671667000  |
| H | 0.172532000  | -1.450657000 | 3.213348000  |
| H | 1.293282000  | -0.094806000 | 3.365249000  |
| C | 0.250977000  | -3.458667000 | 1.082446000  |
| H | 0.810665000  | -4.266008000 | 1.572813000  |
| H | -0.526005000 | -3.143424000 | 1.787540000  |
| H | -0.242736000 | -3.902529000 | 0.211637000  |
| C | 0.679697000  | 3.154939000  | -0.819228000 |
| C | 0.250900000  | 4.198261000  | -0.005778000 |
| C | -0.382468000 | 3.920308000  | 1.212163000  |
| C | -0.581153000 | 2.602930000  | 1.611600000  |
| C | -0.139702000 | 1.571784000  | 0.775147000  |
| N | 0.463999000  | 1.886961000  | -0.400466000 |
| H | -0.713097000 | 4.742868000  | 1.841903000  |
| H | 0.412277000  | 5.224831000  | -0.320435000 |
| H | -1.068353000 | 2.376430000  | 2.555649000  |
| C | 1.362229000  | 3.362808000  | -2.137412000 |
| H | 1.519718000  | 4.424825000  | -2.340481000 |
| H | 2.336832000  | 2.862060000  | -2.154124000 |
| H | 0.764360000  | 2.946369000  | -2.957274000 |
| C | -1.219190000 | -1.271364000 | -2.007002000 |
| H | -1.177173000 | -2.319692000 | -1.713882000 |
| H | -0.617305000 | -0.979703000 | -2.869245000 |
| C | -2.101171000 | -0.418761000 | -1.443225000 |
| H | -2.155502000 | 0.603026000  | -1.827669000 |
| C | -3.071214000 | -0.759809000 | -0.357145000 |
| H | -2.931117000 | -0.075848000 | 0.491944000  |
| H | -2.899482000 | -1.781724000 | 0.004305000  |
| C | -4.535576000 | -0.616562000 | -0.845371000 |
| H | -4.681533000 | -1.283409000 | -1.706428000 |
| H | -4.705688000 | 0.408258000  | -1.198192000 |
| C | -5.515499000 | -0.953731000 | 0.240716000  |
| C | -6.377578000 | -0.088840000 | 0.774478000  |
| H | -5.501217000 | -1.985215000 | 0.595994000  |
| H | -7.072787000 | -0.386554000 | 1.554447000  |
| H | -6.433479000 | 0.946055000  | 0.441454000  |

55

TS2c,  $E_{(\text{SCRF})} = -957.8856285$  a.u.,  $\text{IF} = i274.4601 \text{ cm}^{-1}$

|    |             |              |              |
|----|-------------|--------------|--------------|
| Sc | 0.536068000 | -0.159641000 | -0.319951000 |
| C  | 1.060222000 | -2.428454000 | 0.409989000  |
| C  | 1.929023000 | -2.130118000 | -0.677763000 |
| C  | 2.791996000 | -1.058539000 | -0.274251000 |
| C  | 2.450826000 | -0.696198000 | 1.061631000  |
| C  | 1.360763000 | -1.525040000 | 1.476410000  |

---

|   |              |              |              |
|---|--------------|--------------|--------------|
| C | 2.013297000  | -2.878072000 | -1.977404000 |
| H | 2.375413000  | -2.246761000 | -2.795609000 |
| H | 1.045968000  | -3.290655000 | -2.280381000 |
| H | 2.712034000  | -3.720817000 | -1.893379000 |
| C | 3.931973000  | -0.514480000 | -1.089185000 |
| H | 4.805708000  | -1.174986000 | -1.015358000 |
| H | 4.250077000  | 0.475166000  | -0.748805000 |
| H | 3.686256000  | -0.437451000 | -2.154522000 |
| C | 3.162639000  | 0.293828000  | 1.939135000  |
| H | 2.473578000  | 0.892569000  | 2.545638000  |
| H | 3.787918000  | 0.981806000  | 1.362923000  |
| H | 3.827955000  | -0.228226000 | 2.639150000  |
| C | 0.737960000  | -1.533703000 | 2.845822000  |
| H | 1.294092000  | -2.199367000 | 3.519089000  |
| H | -0.296277000 | -1.893542000 | 2.829130000  |
| H | 0.739157000  | -0.541348000 | 3.309735000  |
| C | 0.071811000  | -3.556250000 | 0.470605000  |
| H | 0.526709000  | -4.435305000 | 0.945817000  |
| H | -0.817579000 | -3.306317000 | 1.059772000  |
| H | -0.260030000 | -3.868630000 | -0.524090000 |
| C | 1.018533000  | 3.209422000  | -0.284299000 |
| C | 0.206545000  | 4.244917000  | 0.164142000  |
| C | -1.124371000 | 3.984624000  | 0.501811000  |
| C | -1.645409000 | 2.704495000  | 0.351792000  |
| C | -0.798334000 | 1.687737000  | -0.095749000 |
| N | 0.491800000  | 1.964325000  | -0.378864000 |
| H | -1.755171000 | 4.790011000  | 0.869093000  |
| H | 0.612601000  | 5.247733000  | 0.250421000  |
| H | -2.690511000 | 2.513317000  | 0.571424000  |
| C | 2.452875000  | 3.399749000  | -0.667847000 |
| H | 2.728983000  | 4.456588000  | -0.647903000 |
| H | 3.113226000  | 2.863815000  | 0.023149000  |
| H | 2.641035000  | 3.012589000  | -1.675196000 |
| C | -1.097816000 | -0.788669000 | -1.711566000 |
| H | -1.326963000 | -1.829167000 | -1.482245000 |
| H | -0.770801000 | -0.609640000 | -2.738845000 |
| C | -1.894443000 | 0.207208000  | -1.074754000 |
| H | -2.222523000 | 1.043421000  | -1.693190000 |
| C | -2.899297000 | -0.254388000 | -0.039815000 |
| H | -3.159207000 | 0.534818000  | 0.670324000  |
| H | -2.467533000 | -1.076165000 | 0.550058000  |
| C | -4.197228000 | -0.747908000 | -0.717180000 |
| H | -3.946816000 | -1.549405000 | -1.425660000 |
| H | -4.634966000 | 0.069670000  | -1.304382000 |
| C | -5.194358000 | -1.242418000 | 0.290746000  |
| C | -6.383721000 | -0.685593000 | 0.517693000  |
| H | -4.898427000 | -2.121564000 | 0.865960000  |
| H | -7.069322000 | -1.088084000 | 1.258193000  |
| H | -6.725543000 | 0.185190000  | -0.039078000 |

---

E3,  $E_{\text{(SCRF)}} = -957.9347774$  a.u.

|    |              |              |              |
|----|--------------|--------------|--------------|
| Sc | 0.582608000  | 0.194950000  | -0.096149000 |
| C  | 2.011068000  | -1.790816000 | -0.252341000 |
| C  | 2.519838000  | -0.820535000 | -1.159110000 |
| C  | 2.956666000  | 0.311926000  | -0.396677000 |
| C  | 2.725983000  | 0.031048000  | 0.984410000  |
| C  | 2.117752000  | -1.259965000 | 1.071206000  |
| C  | 2.669133000  | -0.988758000 | -2.642076000 |
| H  | 2.632162000  | -0.031892000 | -3.172603000 |
| H  | 1.889136000  | -1.630563000 | -3.061575000 |
| H  | 3.636388000  | -1.450186000 | -2.880965000 |
| C  | 3.641331000  | 1.527564000  | -0.958663000 |
| H  | 4.707636000  | 1.325275000  | -1.123289000 |
| H  | 3.584856000  | 2.387630000  | -0.283347000 |
| H  | 3.227686000  | 1.832216000  | -1.926806000 |
| C  | 3.131257000  | 0.884589000  | 2.153172000  |
| H  | 2.421633000  | 0.822530000  | 2.986323000  |
| H  | 3.241720000  | 1.939161000  | 1.882617000  |
| H  | 4.102518000  | 0.555622000  | 2.545310000  |
| C  | 1.764580000  | -1.980708000 | 2.343122000  |
| H  | 2.627203000  | -2.547334000 | 2.717586000  |
| H  | 0.952943000  | -2.701435000 | 2.198816000  |
| H  | 1.466827000  | -1.295668000 | 3.144989000  |
| C  | 1.533216000  | -3.166155000 | -0.610766000 |
| H  | 2.365404000  | -3.881311000 | -0.569761000 |
| H  | 0.765399000  | -3.534364000 | 0.077429000  |
| H  | 1.123048000  | -3.206176000 | -1.623818000 |
| C  | -0.967101000 | 3.037301000  | 0.555079000  |
| C  | -2.045079000 | 3.903048000  | 0.410603000  |
| C  | -3.180194000 | 3.470978000  | -0.273484000 |
| C  | -3.217822000 | 2.181752000  | -0.790977000 |
| C  | -2.115830000 | 1.346301000  | -0.618085000 |
| N  | -1.011991000 | 1.784034000  | 0.040829000  |
| H  | -4.027259000 | 4.139057000  | -0.402206000 |
| H  | -1.990980000 | 4.904571000  | 0.824430000  |
| H  | -4.087291000 | 1.818082000  | -1.329322000 |
| C  | 0.286421000  | 3.440358000  | 1.277066000  |
| H  | 0.236664000  | 4.481111000  | 1.605834000  |
| H  | 0.448160000  | 2.822462000  | 2.169392000  |
| H  | 1.169013000  | 3.346094000  | 0.630746000  |
| C  | -0.716980000 | -0.435273000 | -1.716784000 |
| H  | -0.704073000 | -1.470050000 | -2.073289000 |
| H  | -0.526806000 | 0.202962000  | -2.596205000 |
| C  | -2.090357000 | -0.086968000 | -1.102909000 |
| H  | -2.903696000 | -0.193753000 | -1.836797000 |
| C  | -2.442106000 | -1.014075000 | 0.090519000  |
| H  | -3.294680000 | -0.602736000 | 0.646213000  |
| H  | -1.604975000 | -1.022407000 | 0.823440000  |
| C  | -2.763277000 | -2.460789000 | -0.308977000 |
| H  | -1.911987000 | -2.890410000 | -0.854505000 |

---

|                                             |              |              |              |
|---------------------------------------------|--------------|--------------|--------------|
| H                                           | -3.612052000 | -2.452853000 | -1.004878000 |
| C                                           | -3.088873000 | -3.320353000 | 0.879034000  |
| C                                           | -4.271258000 | -3.892371000 | 1.104241000  |
| H                                           | -2.281780000 | -3.471706000 | 1.599371000  |
| H                                           | -4.450207000 | -4.506640000 | 1.982338000  |
| H                                           | -5.103644000 | -3.778061000 | 0.412255000  |
| 55                                          |              |              |              |
| D4, $E_{\text{(SCRF)}} = -957.9033762$ a.u. |              |              |              |
| Sc                                          | -0.141121000 | -0.278437000 | -0.351062000 |
| C                                           | -1.626930000 | -2.063389000 | 0.299212000  |
| C                                           | -0.474062000 | -2.694353000 | -0.260625000 |
| C                                           | 0.644404000  | -2.398737000 | 0.575131000  |
| C                                           | 0.179665000  | -1.588582000 | 1.660396000  |
| C                                           | -1.222633000 | -1.390919000 | 1.493755000  |
| C                                           | -0.487453000 | -3.617024000 | -1.445727000 |
| H                                           | -0.849749000 | -4.609994000 | -1.148886000 |
| H                                           | 0.508796000  | -3.760535000 | -1.874942000 |
| H                                           | -1.152412000 | -3.265345000 | -2.242474000 |
| C                                           | 2.033038000  | -2.954773000 | 0.433486000  |
| H                                           | 2.131306000  | -3.888503000 | 1.002755000  |
| H                                           | 2.798383000  | -2.271658000 | 0.817523000  |
| H                                           | 2.284963000  | -3.191480000 | -0.605222000 |
| C                                           | 1.004618000  | -1.128792000 | 2.829953000  |
| H                                           | 0.630585000  | -0.194844000 | 3.261792000  |
| H                                           | 2.056945000  | -0.976477000 | 2.567459000  |
| H                                           | 0.984425000  | -1.879268000 | 3.631184000  |
| C                                           | -2.140922000 | -0.680782000 | 2.444890000  |
| H                                           | -2.625909000 | -1.400780000 | 3.116990000  |
| H                                           | -2.936046000 | -0.139909000 | 1.922071000  |
| H                                           | -1.607301000 | 0.036910000  | 3.075035000  |
| C                                           | -3.035905000 | -2.222722000 | -0.192124000 |
| H                                           | -3.478380000 | -3.145762000 | 0.205782000  |
| H                                           | -3.673759000 | -1.392640000 | 0.123335000  |
| H                                           | -3.087251000 | -2.283374000 | -1.283761000 |
| C                                           | -1.350348000 | 2.829533000  | 0.484824000  |
| C                                           | -2.463369000 | 3.478811000  | -0.038622000 |
| C                                           | -3.218322000 | 2.868760000  | -1.048169000 |
| C                                           | -2.860707000 | 1.611526000  | -1.523932000 |
| C                                           | -1.738422000 | 0.980970000  | -0.976769000 |
| N                                           | -1.027665000 | 1.611906000  | -0.009030000 |
| H                                           | -4.087449000 | 3.383701000  | -1.450555000 |
| H                                           | -2.741718000 | 4.456900000  | 0.341995000  |
| H                                           | -3.443119000 | 1.125468000  | -2.301263000 |
| C                                           | -0.484693000 | 3.417820000  | 1.557823000  |
| H                                           | -0.940038000 | 4.312900000  | 1.988810000  |
| H                                           | -0.314120000 | 2.694790000  | 2.362659000  |
| H                                           | 0.496218000  | 3.701543000  | 1.156869000  |
| C                                           | 1.066678000  | -0.720041000 | -2.732912000 |
| H                                           | 1.623706000  | -1.651991000 | -2.657539000 |
| H                                           | 0.089259000  | -0.765787000 | -3.214379000 |



---

|   |             |              |              |
|---|-------------|--------------|--------------|
| C | 1.606036000 | 0.456508000  | -2.359548000 |
| H | 1.023878000 | 1.369219000  | -2.520567000 |
| C | 2.956426000 | 0.629853000  | -1.732017000 |
| H | 3.528464000 | 1.366958000  | -2.310066000 |
| H | 3.514668000 | -0.312997000 | -1.764771000 |
| C | 2.850173000 | 1.130516000  | -0.276168000 |
| H | 2.284512000 | 0.381229000  | 0.320294000  |
| H | 2.284401000 | 2.070285000  | -0.239925000 |
| C | 4.189680000 | 1.316525000  | 0.377915000  |
| C | 4.635187000 | 2.475790000  | 0.860959000  |
| H | 4.823054000 | 0.430384000  | 0.431875000  |
| H | 5.619196000 | 2.560485000  | 1.313067000  |
| H | 4.038853000 | 3.385415000  | 0.819980000  |

55

TS2d,  $E_{(\text{SCRF})} = -957.8833209$  a.u., IF =  $i292.7684$  cm<sup>-1</sup>

|    |              |              |              |
|----|--------------|--------------|--------------|
| Sc | -0.086242000 | -0.051884000 | -0.347636000 |
| C  | -0.228181000 | 1.417182000  | 1.564358000  |
| C  | 1.079224000  | 1.606099000  | 1.008003000  |
| C  | 0.924086000  | 2.166802000  | -0.292317000 |
| C  | -0.476055000 | 2.345822000  | -0.533008000 |
| C  | -1.183421000 | 1.905872000  | 0.622185000  |
| C  | 2.367608000  | 1.425174000  | 1.756046000  |
| H  | 2.587180000  | 2.326214000  | 2.344286000  |
| H  | 3.220442000  | 1.262027000  | 1.091764000  |
| H  | 2.326287000  | 0.591259000  | 2.464232000  |
| C  | 2.015780000  | 2.634254000  | -1.213457000 |
| H  | 2.087312000  | 3.729617000  | -1.191492000 |
| H  | 1.840161000  | 2.354870000  | -2.259665000 |
| H  | 2.995023000  | 2.244287000  | -0.924569000 |
| C  | -1.057064000 | 3.001484000  | -1.754313000 |
| H  | -2.127670000 | 2.803781000  | -1.860580000 |
| H  | -0.562405000 | 2.683684000  | -2.680277000 |
| H  | -0.939525000 | 4.091738000  | -1.697872000 |
| C  | -2.661396000 | 2.006064000  | 0.857248000  |
| H  | -2.897583000 | 2.919687000  | 1.418192000  |
| H  | -3.044921000 | 1.162914000  | 1.441247000  |
| H  | -3.226735000 | 2.050101000  | -0.078151000 |
| C  | -0.524298000 | 0.966477000  | 2.966829000  |
| H  | -0.477496000 | 1.815072000  | 3.662108000  |
| H  | -1.524328000 | 0.531401000  | 3.054572000  |
| H  | 0.194805000  | 0.221985000  | 3.324440000  |
| C  | -3.301994000 | -1.001675000 | -1.045601000 |
| C  | -4.181765000 | -1.702372000 | -0.223544000 |
| C  | -3.710172000 | -2.324363000 | 0.937853000  |
| C  | -2.355105000 | -2.284045000 | 1.248503000  |
| C  | -1.511648000 | -1.570576000 | 0.395091000  |
| N  | -1.996995000 | -0.943721000 | -0.695596000 |
| H  | -4.406899000 | -2.844878000 | 1.590042000  |
| H  | -5.233302000 | -1.755695000 | -0.487562000 |
| H  | -1.964065000 | -2.792875000 | 2.124963000  |

---

|   |              |              |              |
|---|--------------|--------------|--------------|
| C | -3.724265000 | -0.333253000 | -2.317222000 |
| H | -4.810187000 | -0.223623000 | -2.368514000 |
| H | -3.266616000 | 0.656378000  | -2.412809000 |
| H | -3.405339000 | -0.926729000 | -3.183427000 |
| C | 0.287790000  | -2.558736000 | 0.087816000  |
| H | 0.407392000  | -2.865956000 | 1.126349000  |
| H | -0.332252000 | -3.229094000 | -0.503777000 |
| C | 1.350031000  | -1.881635000 | -0.540403000 |
| H | 1.372145000  | -1.976431000 | -1.635400000 |
| C | 2.725111000  | -1.783304000 | 0.111250000  |
| H | 3.101667000  | -2.798976000 | 0.301063000  |
| H | 2.669906000  | -1.299778000 | 1.095939000  |
| C | 3.748732000  | -1.056524000 | -0.771001000 |
| H | 3.387815000  | -0.034414000 | -0.969960000 |
| H | 3.808224000  | -1.558059000 | -1.746409000 |
| C | 5.114803000  | -1.006191000 | -0.151133000 |
| C | 6.211862000  | -1.540282000 | -0.687423000 |
| H | 5.187959000  | -0.500872000 | 0.813831000  |
| H | 7.176916000  | -1.479100000 | -0.192118000 |
| H | 6.188166000  | -2.056568000 | -1.645479000 |

55

E4,  $E_{\text{(SCRF)}} = -957.9330353$  a.u.

|    |              |              |              |
|----|--------------|--------------|--------------|
| Sc | -0.105597000 | 0.279576000  | -0.452214000 |
| C  | -0.135834000 | 1.663718000  | 1.520406000  |
| C  | 1.186827000  | 1.751081000  | 0.986723000  |
| C  | 1.096295000  | 2.384504000  | -0.289820000 |
| C  | -0.274007000 | 2.718456000  | -0.527309000 |
| C  | -1.036015000 | 2.279929000  | 0.595697000  |
| C  | 2.449807000  | 1.410286000  | 1.718614000  |
| H  | 2.814449000  | 2.289823000  | 2.266088000  |
| H  | 3.252083000  | 1.094429000  | 1.046200000  |
| H  | 2.296514000  | 0.615489000  | 2.453708000  |
| C  | 2.251159000  | 2.751073000  | -1.179559000 |
| H  | 2.615303000  | 3.758569000  | -0.938606000 |
| H  | 1.976981000  | 2.762597000  | -2.240540000 |
| H  | 3.099233000  | 2.069820000  | -1.060140000 |
| C  | -0.784798000 | 3.478260000  | -1.720067000 |
| H  | -1.864135000 | 3.362008000  | -1.859082000 |
| H  | -0.293754000 | 3.178352000  | -2.653663000 |
| H  | -0.594202000 | 4.552754000  | -1.601172000 |
| C  | -2.493054000 | 2.538301000  | 0.859189000  |
| H  | -2.604801000 | 3.329566000  | 1.611605000  |
| H  | -3.018459000 | 1.657772000  | 1.246516000  |
| H  | -3.022364000 | 2.878692000  | -0.035336000 |
| C  | -0.508647000 | 1.148193000  | 2.880469000  |
| H  | -0.474295000 | 1.959529000  | 3.619805000  |
| H  | -1.524756000 | 0.740249000  | 2.903860000  |
| H  | 0.176741000  | 0.370192000  | 3.230916000  |
| C  | -3.081649000 | -1.033660000 | -0.897330000 |
| C  | -4.059370000 | -1.981018000 | -0.618801000 |

---

|   |              |              |              |
|---|--------------|--------------|--------------|
| C | -3.738021000 | -3.074478000 | 0.184108000  |
| C | -2.445187000 | -3.206597000 | 0.675252000  |
| C | -1.497839000 | -2.227944000 | 0.377067000  |
| N | -1.833511000 | -1.153708000 | -0.381481000 |
| H | -4.489852000 | -3.825389000 | 0.410480000  |
| H | -5.054840000 | -1.867743000 | -1.035817000 |
| H | -2.159640000 | -4.060708000 | 1.281171000  |
| C | -3.334382000 | 0.117852000  | -1.825823000 |
| H | -4.396986000 | 0.369965000  | -1.873346000 |
| H | -2.795441000 | 1.019614000  | -1.511036000 |
| H | -3.013892000 | -0.134901000 | -2.845624000 |
| C | -0.069377000 | -2.321395000 | 0.858762000  |
| H | -0.023472000 | -1.947630000 | 1.895134000  |
| H | 0.185454000  | -3.390826000 | 0.936939000  |
| C | 0.943791000  | -1.565264000 | -0.023450000 |
| H | 0.772716000  | -1.940815000 | -1.066474000 |
| C | 2.386946000  | -1.890093000 | 0.339641000  |
| H | 2.523456000  | -2.977125000 | 0.464491000  |
| H | 2.639712000  | -1.446040000 | 1.312356000  |
| C | 3.389722000  | -1.406301000 | -0.717206000 |
| H | 3.242487000  | -0.323428000 | -0.872396000 |
| H | 3.170212000  | -1.890635000 | -1.679341000 |
| C | 4.819236000  | -1.667353000 | -0.341965000 |
| C | 5.666874000  | -2.419396000 | -1.043615000 |
| H | 5.162201000  | -1.205154000 | 0.585821000  |
| H | 6.691290000  | -2.580017000 | -0.719054000 |
| H | 5.369305000  | -2.903074000 | -1.972510000 |

69

F1,  $E_{\text{(SCRF)}} = -1245.433461$  a.u.

|    |              |              |              |
|----|--------------|--------------|--------------|
| Sc | -0.726663000 | -0.148947000 | 0.235924000  |
| C  | -1.616798000 | -0.329355000 | 2.516713000  |
| C  | -1.948886000 | 0.980246000  | 2.066395000  |
| C  | -2.872458000 | 0.860386000  | 0.988271000  |
| C  | -3.120910000 | -0.529167000 | 0.773544000  |
| C  | -2.333548000 | -1.266227000 | 1.710493000  |
| C  | -1.492506000 | 2.261589000  | 2.701465000  |
| H  | -1.530099000 | 3.105802000  | 2.004996000  |
| H  | -0.471864000 | 2.187747000  | 3.092395000  |
| H  | -2.138572000 | 2.524129000  | 3.549889000  |
| C  | -3.594942000 | 1.990204000  | 0.312585000  |
| H  | -4.505379000 | 2.254462000  | 0.867256000  |
| H  | -3.909791000 | 1.733114000  | -0.704577000 |
| H  | -2.984572000 | 2.897137000  | 0.252337000  |
| C  | -4.203841000 | -1.080960000 | -0.112955000 |
| H  | -4.123439000 | -2.164103000 | -0.242669000 |
| H  | -4.225867000 | -0.625355000 | -1.110569000 |
| H  | -5.188166000 | -0.891677000 | 0.335285000  |
| C  | -2.358448000 | -2.752843000 | 1.933694000  |
| H  | -3.043728000 | -3.010456000 | 2.752093000  |
| H  | -1.373759000 | -3.146778000 | 2.209080000  |

---

|   |              |              |              |
|---|--------------|--------------|--------------|
| H | -2.698371000 | -3.302335000 | 1.050334000  |
| C | -0.807730000 | -0.661360000 | 3.734640000  |
| H | -1.447125000 | -0.663132000 | 4.627740000  |
| H | -0.348330000 | -1.652502000 | 3.667745000  |
| H | -0.007311000 | 0.063530000  | 3.910181000  |
| C | -0.037006000 | -2.801388000 | -1.631430000 |
| C | 0.802675000  | -3.796340000 | -2.128119000 |
| C | 2.167996000  | -3.701507000 | -1.897780000 |
| C | 2.665930000  | -2.613682000 | -1.187198000 |
| C | 1.791738000  | -1.638908000 | -0.710430000 |
| N | 0.449979000  | -1.753509000 | -0.929281000 |
| H | 2.842774000  | -4.469675000 | -2.265621000 |
| H | 0.381141000  | -4.631335000 | -2.679107000 |
| H | 3.728473000  | -2.529512000 | -0.997589000 |
| C | -1.514843000 | -2.867009000 | -1.886140000 |
| H | -2.076685000 | -2.213575000 | -1.211999000 |
| H | -1.748655000 | -2.570487000 | -2.916280000 |
| H | -1.891080000 | -3.885996000 | -1.751691000 |
| C | 1.236932000  | -0.142033000 | 1.200481000  |
| H | 1.309070000  | -0.959568000 | 1.934551000  |
| H | 1.499035000  | 0.777244000  | 1.741916000  |
| C | 2.240099000  | -0.406437000 | 0.060079000  |
| H | 2.176009000  | 0.427882000  | -0.664464000 |
| C | 3.718534000  | -0.474097000 | 0.494386000  |
| H | 4.358794000  | -0.647459000 | -0.381141000 |
| H | 3.857594000  | -1.330825000 | 1.169488000  |
| C | 4.224266000  | 0.802882000  | 1.179226000  |
| H | 3.648633000  | 0.975668000  | 2.099151000  |
| H | 4.049185000  | 1.668034000  | 0.523641000  |
| C | 5.684508000  | 0.719780000  | 1.519646000  |
| C | 6.632457000  | 1.514623000  | 1.023624000  |
| H | 5.964141000  | -0.063708000 | 2.226362000  |
| H | 7.675708000  | 1.406141000  | 1.307445000  |
| H | 6.400693000  | 2.311246000  | 0.318404000  |
| C | -0.928296000 | 1.879526000  | -2.345551000 |
| C | -0.721534000 | 3.068208000  | -3.046064000 |
| C | -0.013001000 | 4.107619000  | -2.452338000 |
| C | 0.479730000  | 3.935766000  | -1.160939000 |
| C | 0.235073000  | 2.729983000  | -0.520701000 |
| N | -0.454248000 | 1.720947000  | -1.089224000 |
| H | 0.151657000  | 5.037171000  | -2.989722000 |
| H | -1.116482000 | 3.169710000  | -4.052032000 |
| H | 1.039250000  | 4.715534000  | -0.655143000 |
| C | -1.654494000 | 0.720725000  | -2.961644000 |
| H | -2.190784000 | 1.020853000  | -3.865355000 |
| H | -0.948252000 | -0.070864000 | -3.241338000 |
| H | -2.388896000 | 0.296996000  | -2.265908000 |
| H | 0.600670000  | 2.551406000  | 0.486323000  |

69

TS3a,  $E_{\text{(SCRF)}} = -1245.395868$  a.u.,  $\text{IF} = i1298.5981 \text{ cm}^{-1}$

---

|    |              |              |              |
|----|--------------|--------------|--------------|
| Sc | -0.688474000 | -0.296341000 | -0.223865000 |
| C  | -0.896648000 | -2.695095000 | -0.753376000 |
| C  | -1.586508000 | -2.487536000 | 0.477120000  |
| C  | -2.708638000 | -1.647793000 | 0.216400000  |
| C  | -2.703920000 | -1.320726000 | -1.170661000 |
| C  | -1.575969000 | -1.964547000 | -1.772960000 |
| C  | -1.264860000 | -3.152215000 | 1.784060000  |
| H  | -1.641441000 | -2.580333000 | 2.637735000  |
| H  | -0.187096000 | -3.288534000 | 1.923437000  |
| H  | -1.723350000 | -4.148651000 | 1.835739000  |
| C  | -3.771274000 | -1.269354000 | 1.205335000  |
| H  | -4.544385000 | -2.047156000 | 1.260663000  |
| H  | -4.274823000 | -0.337052000 | 0.930768000  |
| H  | -3.368702000 | -1.143997000 | 2.215839000  |
| C  | -3.788652000 | -0.568148000 | -1.888705000 |
| H  | -3.451071000 | -0.161426000 | -2.846777000 |
| H  | -4.185588000 | 0.262532000  | -1.294277000 |
| H  | -4.635962000 | -1.231648000 | -2.106395000 |
| C  | -1.252742000 | -2.031993000 | -3.240361000 |
| H  | -1.547422000 | -3.005180000 | -3.654653000 |
| H  | -0.181961000 | -1.913285000 | -3.444766000 |
| H  | -1.789334000 | -1.272280000 | -3.816539000 |
| C  | 0.236776000  | -3.652331000 | -0.978753000 |
| H  | -0.151924000 | -4.646655000 | -1.236688000 |
| H  | 0.886699000  | -3.343529000 | -1.805214000 |
| H  | 0.860425000  | -3.775010000 | -0.087921000 |
| C  | 0.267743000  | 2.101399000  | -2.131821000 |
| C  | 1.001240000  | 3.224529000  | -2.489025000 |
| C  | 2.238724000  | 3.441536000  | -1.885668000 |
| C  | 2.713834000  | 2.520333000  | -0.965419000 |
| C  | 1.949098000  | 1.390848000  | -0.653016000 |
| N  | 0.735582000  | 1.208464000  | -1.223730000 |
| H  | 2.824521000  | 4.322115000  | -2.134411000 |
| H  | 0.604645000  | 3.920440000  | -3.221282000 |
| H  | 3.672513000  | 2.672506000  | -0.481842000 |
| C  | -1.076151000 | 1.812632000  | -2.733540000 |
| H  | -1.841810000 | 1.662165000  | -1.959735000 |
| H  | -1.417017000 | 2.638100000  | -3.363698000 |
| H  | -1.038908000 | 0.910960000  | -3.355783000 |
| C  | 1.466142000  | -0.803563000 | 0.504392000  |
| H  | 1.470281000  | -1.414446000 | -0.415463000 |
| H  | 1.805342000  | -1.485750000 | 1.291285000  |
| C  | 2.449911000  | 0.354716000  | 0.337970000  |
| H  | 2.545194000  | 0.876836000  | 1.305295000  |
| C  | 3.871570000  | -0.125519000 | -0.054413000 |
| H  | 4.526656000  | 0.737719000  | -0.221071000 |
| H  | 3.810876000  | -0.655700000 | -1.015656000 |
| C  | 4.542438000  | -1.024429000 | 0.994166000  |
| H  | 3.953292000  | -1.943000000 | 1.124978000  |
| H  | 4.554685000  | -0.511726000 | 1.966003000  |

---

|   |              |              |              |
|---|--------------|--------------|--------------|
| C | 5.944298000  | -1.392583000 | 0.600038000  |
| C | 7.040080000  | -1.062579000 | 1.283196000  |
| H | 6.045163000  | -1.969279000 | -0.321194000 |
| H | 8.031217000  | -1.357153000 | 0.949244000  |
| H | 6.988029000  | -0.492790000 | 2.209437000  |
| C | -2.237044000 | 2.197468000  | 1.663632000  |
| C | -2.214745000 | 2.421833000  | 3.040436000  |
| C | -1.423877000 | 1.620775000  | 3.865636000  |
| C | -0.652429000 | 0.603410000  | 3.307884000  |
| C | -0.711020000 | 0.423984000  | 1.927764000  |
| N | -1.481251000 | 1.205750000  | 1.150328000  |
| H | -1.414241000 | 1.794604000  | 4.938625000  |
| H | -2.818965000 | 3.219346000  | 3.461769000  |
| H | -0.024656000 | -0.031160000 | 3.926613000  |
| C | -3.057332000 | 3.024532000  | 0.720890000  |
| H | -3.728333000 | 3.696329000  | 1.261692000  |
| H | -2.410179000 | 3.636546000  | 0.081014000  |
| H | -3.662153000 | 2.386745000  | 0.067564000  |
| H | 0.337159000  | -0.295070000 | 1.343440000  |

69

G1,  $E_{\text{(SCRF)}} = -1245.431665$  a.u.

|    |              |              |              |
|----|--------------|--------------|--------------|
| Sc | 0.701673000  | -0.322415000 | 0.045785000  |
| C  | 0.202010000  | -2.622026000 | 0.808573000  |
| C  | 0.933476000  | -2.726084000 | -0.416339000 |
| C  | 2.245726000  | -2.222026000 | -0.189121000 |
| C  | 2.320383000  | -1.776433000 | 1.163491000  |
| C  | 1.057916000  | -2.035279000 | 1.783601000  |
| C  | 0.452072000  | -3.363830000 | -1.687793000 |
| H  | 0.857748000  | -2.865016000 | -2.573957000 |
| H  | -0.639524000 | -3.351547000 | -1.769712000 |
| H  | 0.762800000  | -4.415791000 | -1.736720000 |
| C  | 3.385734000  | -2.257175000 | -1.162213000 |
| H  | 4.006636000  | -3.146936000 | -0.991999000 |
| H  | 4.039176000  | -1.383866000 | -1.067455000 |
| H  | 3.036397000  | -2.297053000 | -2.197508000 |
| C  | 3.564466000  | -1.296687000 | 1.855619000  |
| H  | 3.347390000  | -0.613333000 | 2.684010000  |
| H  | 4.242084000  | -0.783871000 | 1.166034000  |
| H  | 4.121131000  | -2.142360000 | 2.281180000  |
| C  | 0.742476000  | -1.922317000 | 3.247843000  |
| H  | 0.815487000  | -2.907749000 | 3.727554000  |
| H  | -0.273993000 | -1.557099000 | 3.437206000  |
| H  | 1.444257000  | -1.267138000 | 3.772458000  |
| C  | -1.153341000 | -3.203800000 | 1.097947000  |
| H  | -1.049894000 | -4.185979000 | 1.578470000  |
| H  | -1.742830000 | -2.579979000 | 1.780095000  |
| H  | -1.743725000 | -3.361859000 | 0.189937000  |
| C  | -0.328394000 | 2.102111000  | 1.757716000  |
| C  | -0.873217000 | 3.353640000  | 2.017368000  |
| C  | -1.979872000 | 3.777323000  | 1.286017000  |

---

|   |              |              |              |
|---|--------------|--------------|--------------|
| C | -2.525402000 | 2.919625000  | 0.344451000  |
| C | -1.949545000 | 1.663651000  | 0.129429000  |
| N | -0.842403000 | 1.279218000  | 0.805711000  |
| H | -2.413143000 | 4.758589000  | 1.457861000  |
| H | -0.432254000 | 3.984817000  | 2.782143000  |
| H | -3.399318000 | 3.209225000  | -0.230880000 |
| C | 0.831758000  | 1.586863000  | 2.557372000  |
| H | 1.628690000  | 1.170843000  | 1.924614000  |
| H | 1.291057000  | 2.384835000  | 3.146543000  |
| H | 0.501765000  | 0.806683000  | 3.251247000  |
| C | -1.740084000 | -0.449354000 | -1.264266000 |
| H | -1.547279000 | -1.132575000 | -0.422577000 |
| H | -2.225891000 | -1.063307000 | -2.027019000 |
| C | -2.627018000 | 0.710696000  | -0.834105000 |
| H | -2.882805000 | 1.294081000  | -1.730230000 |
| C | -3.956888000 | 0.219296000  | -0.207675000 |
| H | -4.523148000 | 1.085552000  | 0.154244000  |
| H | -3.728224000 | -0.388201000 | 0.680158000  |
| C | -4.855751000 | -0.574049000 | -1.168771000 |
| H | -4.341616000 | -1.490893000 | -1.490913000 |
| H | -5.042319000 | 0.020082000  | -2.073571000 |
| C | -6.163501000 | -0.945294000 | -0.529226000 |
| C | -7.358720000 | -0.527518000 | -0.944985000 |
| H | -6.100960000 | -1.601542000 | 0.340616000  |
| H | -8.274145000 | -0.827918000 | -0.442725000 |
| H | -7.469667000 | 0.122789000  | -1.810993000 |
| C | 3.164956000  | 1.969262000  | -0.831686000 |
| C | 3.584725000  | 2.314296000  | -2.112885000 |
| C | 2.983303000  | 1.721325000  | -3.228154000 |
| C | 1.971371000  | 0.784121000  | -3.052148000 |
| C | 1.578050000  | 0.455501000  | -1.750221000 |
| N | 2.175753000  | 1.056674000  | -0.699172000 |
| H | 3.315236000  | 1.996842000  | -4.226456000 |
| H | 4.378355000  | 3.044836000  | -2.237729000 |
| H | 1.497524000  | 0.312980000  | -3.909050000 |
| C | 3.754332000  | 2.585271000  | 0.402471000  |
| H | 4.642043000  | 3.175878000  | 0.162063000  |
| H | 3.031875000  | 3.252444000  | 0.888495000  |
| H | 4.040051000  | 1.817601000  | 1.129221000  |
| H | -0.803677000 | -0.101239000 | -1.735756000 |

30

$P_{\text{mono}}, E_{(\text{SCRF})} = -521.9758354 \text{ a.u.}$

|   |             |              |              |
|---|-------------|--------------|--------------|
| C | 2.615415000 | 0.815976000  | -0.118425000 |
| C | 3.341743000 | -0.142360000 | -0.833293000 |
| C | 2.763308000 | -1.387256000 | -1.061007000 |
| C | 1.485422000 | -1.636782000 | -0.571811000 |
| C | 0.825650000 | -0.624973000 | 0.133950000  |
| N | 1.385220000 | 0.571999000  | 0.351377000  |
| H | 3.302866000 | -2.153391000 | -1.612969000 |
| H | 4.338349000 | 0.087096000  | -1.200456000 |

---

|   |              |              |              |
|---|--------------|--------------|--------------|
| H | 1.002842000  | -2.597401000 | -0.731168000 |
| C | 3.177607000  | 2.182404000  | 0.168308000  |
| H | 3.241858000  | 2.348638000  | 1.249792000  |
| H | 4.174517000  | 2.312751000  | -0.263483000 |
| H | 2.517068000  | 2.958190000  | -0.234939000 |
| C | -0.573622000 | -0.632357000 | 2.208864000  |
| H | -0.266907000 | 0.388762000  | 2.458142000  |
| H | -1.563535000 | -0.818249000 | 2.638937000  |
| C | -0.573035000 | -0.824989000 | 0.687193000  |
| H | -0.873121000 | -1.859798000 | 0.466146000  |
| C | -1.552131000 | 0.119800000  | -0.037669000 |
| H | -1.440853000 | -0.021110000 | -1.121164000 |
| H | -1.250111000 | 1.154599000  | 0.170809000  |
| C | -3.029187000 | -0.084897000 | 0.329947000  |
| H | -3.169508000 | 0.108416000  | 1.403100000  |
| H | -3.316164000 | -1.131582000 | 0.157936000  |
| C | -3.936849000 | 0.821134000  | -0.449578000 |
| C | -4.899801000 | 0.420246000  | -1.280117000 |
| H | -3.764943000 | 1.891451000  | -0.317162000 |
| H | -5.520698000 | 1.129024000  | -1.822447000 |
| H | -5.106508000 | -0.635718000 | -1.447251000 |
| H | 0.131193000  | -1.321355000 | 2.688370000  |

83

F2,  $E_{\text{(SCRF)}} = -1532.903503$  a.u.

|    |              |              |              |
|----|--------------|--------------|--------------|
| Sc | -0.479386000 | -0.102950000 | -0.569004000 |
| C  | -0.407269000 | -1.137448000 | -2.847089000 |
| C  | -1.438744000 | -1.829259000 | -2.150353000 |
| C  | -2.518908000 | -0.921981000 | -1.940247000 |
| C  | -2.139646000 | 0.341821000  | -2.481882000 |
| C  | -0.828586000 | 0.212391000  | -3.028063000 |
| C  | -1.462674000 | -3.307768000 | -1.892014000 |
| H  | -2.127395000 | -3.574978000 | -1.064775000 |
| H  | -0.468473000 | -3.699379000 | -1.653817000 |
| H  | -1.817874000 | -3.850669000 | -2.778615000 |
| C  | -3.931052000 | -1.317707000 | -1.607422000 |
| H  | -4.504128000 | -1.442444000 | -2.536905000 |
| H  | -4.469575000 | -0.575258000 | -1.009239000 |
| H  | -3.982018000 | -2.273755000 | -1.079548000 |
| C  | -3.091947000 | 1.464892000  | -2.786102000 |
| H  | -2.570376000 | 2.388566000  | -3.051288000 |
| H  | -3.785758000 | 1.692364000  | -1.969281000 |
| H  | -3.711440000 | 1.193111000  | -3.652330000 |
| C  | -0.107232000 | 1.264518000  | -3.820491000 |
| H  | -0.447839000 | 1.268471000  | -4.864954000 |
| H  | 0.973681000  | 1.095820000  | -3.838186000 |
| H  | -0.273562000 | 2.271882000  | -3.423887000 |
| C  | 0.782967000  | -1.788530000 | -3.485851000 |
| H  | 0.503630000  | -2.193434000 | -4.468024000 |
| H  | 1.607832000  | -1.090047000 | -3.650184000 |
| H  | 1.169325000  | -2.624243000 | -2.893468000 |



---

|   |              |              |              |
|---|--------------|--------------|--------------|
| C | 0.085898000  | 3.288649000  | -0.173876000 |
| C | 0.814055000  | 4.431694000  | 0.158979000  |
| C | 2.150348000  | 4.305009000  | 0.504047000  |
| C | 2.726468000  | 3.040148000  | 0.493720000  |
| C | 1.960987000  | 1.930455000  | 0.135236000  |
| N | 0.646511000  | 2.060971000  | -0.188264000 |
| H | 2.740503000  | 5.177648000  | 0.770582000  |
| H | 0.325743000  | 5.401612000  | 0.141559000  |
| H | 3.771546000  | 2.919388000  | 0.750507000  |
| C | -1.363795000 | 3.427673000  | -0.527665000 |
| H | -1.496380000 | 4.138516000  | -1.351065000 |
| H | -1.795069000 | 2.474551000  | -0.835018000 |
| H | -1.937331000 | 3.811181000  | 0.323948000  |
| C | 1.700879000  | -0.255726000 | -0.950003000 |
| H | 1.821389000  | 0.264978000  | -1.912271000 |
| H | 2.109336000  | -1.258542000 | -1.120085000 |
| C | 2.531149000  | 0.522990000  | 0.073568000  |
| H | 2.399664000  | 0.078994000  | 1.080803000  |
| C | 4.055532000  | 0.510442000  | -0.182907000 |
| H | 4.576947000  | 1.090607000  | 0.589377000  |
| H | 4.259743000  | 1.004229000  | -1.143689000 |
| C | 4.677322000  | -0.892879000 | -0.181420000 |
| H | 4.231300000  | -1.491951000 | -0.987447000 |
| H | 4.441428000  | -1.400125000 | 0.765617000  |
| C | 6.166817000  | -0.850993000 | -0.366954000 |
| C | 7.062702000  | -1.279669000 | 0.522004000  |
| H | 6.515772000  | -0.424974000 | -1.309434000 |
| H | 8.130827000  | -1.220948000 | 0.331130000  |
| H | 6.762374000  | -1.713128000 | 1.474783000  |
| C | -2.536918000 | 1.316467000  | 2.001773000  |
| C | -2.710705000 | 1.825468000  | 3.295122000  |
| C | -1.667620000 | 1.777396000  | 4.208229000  |
| C | -0.457894000 | 1.212908000  | 3.806122000  |
| C | -0.359915000 | 0.736505000  | 2.508785000  |
| N | -1.362143000 | 0.781603000  | 1.609380000  |
| H | -1.793749000 | 2.168365000  | 5.213954000  |
| H | -3.671482000 | 2.250846000  | 3.570590000  |
| H | 0.391479000  | 1.143282000  | 4.477684000  |
| C | -3.683116000 | 1.336861000  | 1.036360000  |
| H | -4.505358000 | 0.709059000  | 1.400190000  |
| H | -4.083175000 | 2.349555000  | 0.915815000  |
| H | -3.375338000 | 0.964410000  | 0.058254000  |
| H | 0.569904000  | 0.289999000  | 2.168368000  |
| C | -1.346928000 | -2.656744000 | 1.642676000  |
| C | -1.130550000 | -3.782780000 | 2.444575000  |
| C | 0.138357000  | -4.332197000 | 2.555098000  |
| C | 1.176075000  | -3.732383000 | 1.847796000  |
| C | 0.887988000  | -2.622100000 | 1.068158000  |
| N | -0.340563000 | -2.075149000 | 0.949597000  |
| H | 0.312645000  | -5.207831000 | 3.174040000  |

---

|                                                                                         |              |              |              |
|-----------------------------------------------------------------------------------------|--------------|--------------|--------------|
| H                                                                                       | -1.972153000 | -4.218399000 | 2.975296000  |
| H                                                                                       | 2.191193000  | -4.113825000 | 1.887467000  |
| C                                                                                       | -2.727626000 | -2.078771000 | 1.569254000  |
| H                                                                                       | -2.956921000 | -1.515698000 | 2.481883000  |
| H                                                                                       | -2.836449000 | -1.408742000 | 0.716795000  |
| H                                                                                       | -3.474885000 | -2.874375000 | 1.483213000  |
| H                                                                                       | 1.672412000  | -2.140822000 | 0.500774000  |
| 83                                                                                      |              |              |              |
| TS3b, $E_{(\text{SCRF})} = -1532.863641$ a.u., $\text{IF} = i1265.3075 \text{ cm}^{-1}$ |              |              |              |
| Sc                                                                                      | -0.506880000 | -0.264707000 | -0.501834000 |
| C                                                                                       | -0.468364000 | -1.547716000 | -2.678886000 |
| C                                                                                       | -1.437776000 | -2.175763000 | -1.848873000 |
| C                                                                                       | -2.512342000 | -1.262055000 | -1.653508000 |
| C                                                                                       | -2.208917000 | -0.065506000 | -2.368907000 |
| C                                                                                       | -0.926717000 | -0.231430000 | -2.976864000 |
| C                                                                                       | -1.446122000 | -3.619503000 | -1.443322000 |
| H                                                                                       | -1.917203000 | -3.774658000 | -0.466995000 |
| H                                                                                       | -0.437406000 | -4.039901000 | -1.395575000 |
| H                                                                                       | -2.011641000 | -4.217547000 | -2.171144000 |
| C                                                                                       | -3.844660000 | -1.633339000 | -1.070781000 |
| H                                                                                       | -4.452721000 | -2.157036000 | -1.821874000 |
| H                                                                                       | -4.427415000 | -0.764817000 | -0.749692000 |
| H                                                                                       | -3.746543000 | -2.311527000 | -0.217516000 |
| C                                                                                       | -3.213678000 | 0.987948000  | -2.747744000 |
| H                                                                                       | -2.742680000 | 1.880937000  | -3.166495000 |
| H                                                                                       | -3.858302000 | 1.304317000  | -1.922150000 |
| H                                                                                       | -3.877353000 | 0.587784000  | -3.526414000 |
| C                                                                                       | -0.271798000 | 0.723095000  | -3.933345000 |
| H                                                                                       | -0.556753000 | 0.495731000  | -4.969652000 |
| H                                                                                       | 0.821261000  | 0.672280000  | -3.886064000 |
| H                                                                                       | -0.557133000 | 1.762229000  | -3.742833000 |
| C                                                                                       | 0.695191000  | -2.243605000 | -3.320787000 |
| H                                                                                       | 0.349848000  | -2.810766000 | -4.195616000 |
| H                                                                                       | 1.458622000  | -1.545895000 | -3.675554000 |
| H                                                                                       | 1.181773000  | -2.957720000 | -2.648794000 |
| C                                                                                       | 0.308625000  | 3.079910000  | -0.874005000 |
| C                                                                                       | 1.115233000  | 4.219071000  | -0.932676000 |
| C                                                                                       | 2.472384000  | 4.102407000  | -0.685045000 |
| C                                                                                       | 2.989582000  | 2.847911000  | -0.379783000 |
| C                                                                                       | 2.143458000  | 1.741718000  | -0.343733000 |
| N                                                                                       | 0.812690000  | 1.858413000  | -0.599837000 |
| H                                                                                       | 3.122998000  | 4.971555000  | -0.729063000 |
| H                                                                                       | 0.666881000  | 5.178433000  | -1.173413000 |
| H                                                                                       | 4.047984000  | 2.732289000  | -0.184154000 |
| C                                                                                       | -1.163159000 | 3.231466000  | -1.108968000 |
| H                                                                                       | -1.354321000 | 3.791056000  | -2.031110000 |
| H                                                                                       | -1.662378000 | 2.265817000  | -1.184242000 |
| H                                                                                       | -1.623866000 | 3.793678000  | -0.288279000 |
| C                                                                                       | 1.872369000  | -0.622611000 | -0.943625000 |
| H                                                                                       | 1.783743000  | -0.193865000 | -1.945922000 |

---

|   |              |              |              |
|---|--------------|--------------|--------------|
| H | 2.435700000  | -1.554932000 | -1.077305000 |
| C | 2.637438000  | 0.341372000  | -0.032940000 |
| H | 2.364522000  | 0.130529000  | 1.021429000  |
| C | 4.170717000  | 0.196734000  | -0.088431000 |
| H | 4.638633000  | 0.955634000  | 0.551195000  |
| H | 4.518593000  | 0.384150000  | -1.114039000 |
| C | 4.688285000  | -1.165854000 | 0.396735000  |
| H | 4.291406000  | -1.966821000 | -0.243425000 |
| H | 4.319096000  | -1.356992000 | 1.414250000  |
| C | 6.188687000  | -1.233529000 | 0.385508000  |
| C | 6.954290000  | -1.402717000 | 1.463251000  |
| H | 6.662633000  | -1.125423000 | -0.591741000 |
| H | 8.038014000  | -1.440418000 | 1.393733000  |
| H | 6.526672000  | -1.517331000 | 2.458077000  |
| C | -2.447403000 | 1.804106000  | 1.841254000  |
| C | -2.602072000 | 2.481769000  | 3.057962000  |
| C | -1.525819000 | 2.611127000  | 3.923689000  |
| C | -0.305663000 | 2.049784000  | 3.551307000  |
| C | -0.231167000 | 1.403885000  | 2.326489000  |
| N | -1.263319000 | 1.276479000  | 1.472645000  |
| H | -1.635233000 | 3.133080000  | 4.870195000  |
| H | -3.573112000 | 2.896956000  | 3.312373000  |
| H | 0.569784000  | 2.110630000  | 4.189629000  |
| C | -3.617989000 | 1.655961000  | 0.917597000  |
| H | -4.518084000 | 1.360692000  | 1.467093000  |
| H | -3.846523000 | 2.601909000  | 0.411595000  |
| H | -3.410118000 | 0.902209000  | 0.157189000  |
| H | 0.709595000  | 0.962890000  | 2.010350000  |
| C | -1.658768000 | -2.187098000 | 2.250715000  |
| C | -1.078753000 | -3.286349000 | 2.888126000  |
| C | 0.160656000  | -3.765866000 | 2.466242000  |
| C | 0.811198000  | -3.140158000 | 1.405768000  |
| C | 0.174637000  | -2.059254000 | 0.798692000  |
| N | -1.013396000 | -1.610297000 | 1.216593000  |
| H | 0.609929000  | -4.621041000 | 2.964892000  |
| H | -1.600777000 | -3.759843000 | 3.714396000  |
| H | 1.780724000  | -3.485010000 | 1.057768000  |
| C | -2.964012000 | -1.607681000 | 2.706844000  |
| H | -2.791186000 | -0.769955000 | 3.393871000  |
| H | -3.543313000 | -1.229944000 | 1.861552000  |
| H | -3.561690000 | -2.353469000 | 3.238480000  |
| H | 0.954583000  | -1.402546000 | -0.144026000 |

83

G2,  $E_{(\text{SCRF})} = -1532.920631$  a.u.

|    |              |             |              |
|----|--------------|-------------|--------------|
| Sc | -0.890902000 | 0.104718000 | -0.162214000 |
| C  | -1.751835000 | 1.594584000 | -1.967331000 |
| C  | -2.362510000 | 0.326054000 | -2.166453000 |
| C  | -3.216859000 | 0.070070000 | -1.056810000 |
| C  | -3.157495000 | 1.197359000 | -0.181375000 |
| C  | -2.249070000 | 2.141933000 | -0.749530000 |

---

|   |              |              |              |
|---|--------------|--------------|--------------|
| C | -2.260053000 | -0.518791000 | -3.399775000 |
| H | -2.278473000 | -1.589928000 | -3.174110000 |
| H | -1.342840000 | -0.315026000 | -3.958866000 |
| H | -3.104776000 | -0.314563000 | -4.071727000 |
| C | -4.182259000 | -1.075406000 | -0.961939000 |
| H | -5.133866000 | -0.818401000 | -1.447362000 |
| H | -4.423126000 | -1.345526000 | 0.071964000  |
| H | -3.800619000 | -1.969715000 | -1.463193000 |
| C | -4.125178000 | 1.478378000  | 0.934263000  |
| H | -3.692214000 | 2.073153000  | 1.745905000  |
| H | -4.532480000 | 0.562041000  | 1.371013000  |
| H | -4.980238000 | 2.051528000  | 0.550555000  |
| C | -2.058488000 | 3.560845000  | -0.299463000 |
| H | -2.736128000 | 4.224776000  | -0.853597000 |
| H | -1.041545000 | 3.925549000  | -0.474566000 |
| H | -2.285868000 | 3.695968000  | 0.761948000  |
| C | -0.855975000 | 2.297300000  | -2.943388000 |
| H | -1.446992000 | 2.817267000  | -3.709626000 |
| H | -0.233495000 | 3.052910000  | -2.454161000 |
| H | -0.193725000 | 1.599947000  | -3.466179000 |
| C | 0.391354000  | 2.597968000  | 1.683259000  |
| C | 1.031077000  | 3.790299000  | 2.016774000  |
| C | 2.134064000  | 4.202863000  | 1.281830000  |
| C | 2.588899000  | 3.379712000  | 0.264018000  |
| C | 1.925525000  | 2.182740000  | -0.021262000 |
| N | 0.802250000  | 1.815302000  | 0.651104000  |
| H | 2.638710000  | 5.137405000  | 1.510862000  |
| H | 0.656267000  | 4.383477000  | 2.844946000  |
| H | 3.470512000  | 3.648975000  | -0.307454000 |
| C | -0.759602000 | 2.140633000  | 2.531015000  |
| H | -1.210303000 | 2.985201000  | 3.059487000  |
| H | -1.546593000 | 1.660962000  | 1.941440000  |
| H | -0.417565000 | 1.420511000  | 3.282784000  |
| C | 2.942508000  | 1.885969000  | -2.338053000 |
| H | 3.788905000  | 2.572317000  | -2.218260000 |
| H | 3.245489000  | 1.129610000  | -3.068752000 |
| C | 2.546845000  | 1.222296000  | -1.012725000 |
| H | 1.802605000  | 0.444492000  | -1.221571000 |
| C | 3.761599000  | 0.556842000  | -0.318595000 |
| H | 3.458208000  | 0.191849000  | 0.671812000  |
| H | 4.525913000  | 1.323939000  | -0.128042000 |
| C | 4.391903000  | -0.610141000 | -1.093825000 |
| H | 4.793190000  | -0.240931000 | -2.048139000 |
| H | 3.622923000  | -1.354667000 | -1.337009000 |
| C | 5.496966000  | -1.262125000 | -0.313614000 |
| C | 5.506622000  | -2.536458000 | 0.078930000  |
| H | 6.342563000  | -0.621465000 | -0.056564000 |
| H | 6.337601000  | -2.955112000 | 0.640399000  |
| H | 4.692181000  | -3.216794000 | -0.166240000 |
| C | -1.165948000 | -1.457126000 | 2.913591000  |

---

|   |              |              |              |
|---|--------------|--------------|--------------|
| C | -0.629974000 | -2.213252000 | 3.959742000  |
| C | 0.738866000  | -2.450156000 | 4.017199000  |
| C | 1.550812000  | -1.924976000 | 3.015398000  |
| C | 0.948182000  | -1.181091000 | 2.010997000  |
| N | -0.373451000 | -0.940415000 | 1.949945000  |
| H | 1.162582000  | -3.038309000 | 4.826394000  |
| H | -1.293878000 | -2.612675000 | 4.720287000  |
| H | 2.623818000  | -2.085479000 | 3.002453000  |
| C | -2.636141000 | -1.181330000 | 2.833385000  |
| H | -3.202275000 | -1.849504000 | 3.487611000  |
| H | -2.858166000 | -0.151524000 | 3.137421000  |
| H | -3.000346000 | -1.311487000 | 1.809646000  |
| H | 1.547253000  | -0.756676000 | 1.210657000  |
| C | -0.859066000 | -3.302642000 | -0.900822000 |
| C | -0.105347000 | -3.967322000 | -1.865849000 |
| C | 0.791773000  | -3.247450000 | -2.660229000 |
| C | 0.933421000  | -1.875967000 | -2.474450000 |
| C | 0.156317000  | -1.239542000 | -1.498592000 |
| N | -0.707207000 | -1.968646000 | -0.766746000 |
| H | 1.374376000  | -3.766003000 | -3.418374000 |
| H | -0.220058000 | -5.039735000 | -1.993365000 |
| H | 1.631659000  | -1.308490000 | -3.083992000 |
| C | -1.803538000 | -4.018772000 | 0.019118000  |
| H | -1.377253000 | -4.089856000 | 1.027571000  |
| H | -2.755733000 | -3.486375000 | 0.100927000  |
| H | -2.003415000 | -5.035259000 | -0.330488000 |
| H | 2.110649000  | 2.449050000  | -2.770728000 |

69

H1,  $E_{(\text{SCRF})} = -1245.429658$  a.u.

|    |              |              |              |
|----|--------------|--------------|--------------|
| Sc | -0.508841000 | -0.312799000 | -0.078812000 |
| C  | -2.609289000 | -0.167766000 | 1.300440000  |
| C  | -2.626946000 | 0.968581000  | 0.441791000  |
| C  | -2.747432000 | 0.503579000  | -0.901864000 |
| C  | -2.846278000 | -0.920674000 | -0.861794000 |
| C  | -2.762300000 | -1.332938000 | 0.495770000  |
| C  | -2.745677000 | 2.390280000  | 0.907720000  |
| H  | -2.455819000 | 3.111870000  | 0.138785000  |
| H  | -2.139320000 | 2.594055000  | 1.796646000  |
| H  | -3.787231000 | 2.610928000  | 1.177316000  |
| C  | -3.030330000 | 1.340515000  | -2.120462000 |
| H  | -4.091309000 | 1.270914000  | -2.395356000 |
| H  | -2.461167000 | 1.025479000  | -3.005163000 |
| H  | -2.823611000 | 2.400910000  | -1.949515000 |
| C  | -3.293939000 | -1.785276000 | -2.005897000 |
| H  | -2.878928000 | -2.798329000 | -1.972236000 |
| H  | -3.049641000 | -1.351355000 | -2.981626000 |
| H  | -4.386800000 | -1.896358000 | -1.981488000 |
| C  | -3.044157000 | -2.714551000 | 1.005403000  |
| H  | -4.127633000 | -2.863165000 | 1.112139000  |
| H  | -2.601968000 | -2.894426000 | 1.989447000  |

---

|   |              |              |              |
|---|--------------|--------------|--------------|
| H | -2.688257000 | -3.499832000 | 0.329673000  |
| C | -2.647837000 | -0.135845000 | 2.800725000  |
| H | -3.685729000 | -0.156408000 | 3.159779000  |
| H | -2.136030000 | -0.993427000 | 3.247972000  |
| H | -2.193256000 | 0.773509000  | 3.207816000  |
| C | 2.814089000  | 0.193055000  | -1.124907000 |
| C | 4.193845000  | 0.219936000  | -0.913693000 |
| C | 4.734857000  | -0.471425000 | 0.162699000  |
| C | 3.882296000  | -1.216005000 | 0.967827000  |
| C | 2.512148000  | -1.221025000 | 0.701080000  |
| N | 1.978061000  | -0.479300000 | -0.301936000 |
| H | 5.804269000  | -0.450408000 | 0.354044000  |
| H | 4.828408000  | 0.776887000  | -1.596862000 |
| H | 4.265441000  | -1.806761000 | 1.794589000  |
| C | 2.253125000  | 0.899983000  | -2.327656000 |
| H | 2.831697000  | 0.639389000  | -3.221054000 |
| H | 1.213606000  | 0.622398000  | -2.518577000 |
| H | 2.303194000  | 1.988385000  | -2.217462000 |
| C | 0.173592000  | -1.567326000 | 1.577747000  |
| H | -0.503312000 | -2.347166000 | 1.941843000  |
| H | 0.167176000  | -0.792511000 | 2.366283000  |
| C | 1.584576000  | -2.137823000 | 1.460089000  |
| H | 2.026596000  | -2.293316000 | 2.457065000  |
| C | 1.594268000  | -3.537104000 | 0.791355000  |
| H | 0.830963000  | -4.147820000 | 1.290556000  |
| H | 2.556928000  | -4.025843000 | 0.986023000  |
| C | 1.371408000  | -3.560182000 | -0.727355000 |
| H | 1.357419000  | -4.615234000 | -1.040949000 |
| H | 2.221369000  | -3.102289000 | -1.246651000 |
| C | 0.097924000  | -2.948715000 | -1.220664000 |
| C | 0.026836000  | -2.043270000 | -2.215445000 |
| H | -0.825069000 | -3.330533000 | -0.783419000 |
| H | -0.920632000 | -1.747569000 | -2.656244000 |
| H | 0.932802000  | -1.692943000 | -2.704317000 |
| C | 0.802393000  | 2.612053000  | 1.121504000  |
| C | 1.148888000  | 3.964003000  | 1.029201000  |
| C | 0.886790000  | 4.678395000  | -0.132974000 |
| C | 0.271259000  | 4.018168000  | -1.193066000 |
| C | -0.044339000 | 2.677405000  | -1.029899000 |
| N | 0.211622000  | 1.970950000  | 0.086271000  |
| H | 1.150501000  | 5.729584000  | -0.207196000 |
| H | 1.619292000  | 4.446513000  | 1.880093000  |
| H | 0.033011000  | 4.524179000  | -2.122966000 |
| C | 1.067701000  | 1.849138000  | 2.383578000  |
| H | 1.751764000  | 1.013284000  | 2.204853000  |
| H | 1.513709000  | 2.495578000  | 3.143284000  |
| H | 0.139203000  | 1.437969000  | 2.794378000  |
| H | -0.538588000 | 2.140087000  | -1.834308000 |

69

TS4a,  $E_{\text{(SCRF)}} = -1245.414793$  a.u.,  $\text{IF} = i263.5419 \text{ cm}^{-1}$

---

|    |              |              |              |
|----|--------------|--------------|--------------|
| Sc | -0.603859000 | -0.329495000 | -0.180824000 |
| C  | -2.442685000 | -0.359247000 | 1.520762000  |
| C  | -2.632595000 | 0.831935000  | 0.763148000  |
| C  | -2.958629000 | 0.454476000  | -0.574096000 |
| C  | -3.010730000 | -0.968318000 | -0.629100000 |
| C  | -2.690870000 | -1.471855000 | 0.660413000  |
| C  | -2.696649000 | 2.220371000  | 1.328036000  |
| H  | -2.460612000 | 2.988009000  | 0.584667000  |
| H  | -2.018135000 | 2.359776000  | 2.176153000  |
| H  | -3.709503000 | 2.432542000  | 1.696013000  |
| C  | -3.407710000 | 1.372499000  | -1.676331000 |
| H  | -4.502920000 | 1.368575000  | -1.757722000 |
| H  | -3.020670000 | 1.076187000  | -2.659404000 |
| H  | -3.111305000 | 2.410164000  | -1.496443000 |
| C  | -3.553350000 | -1.782086000 | -1.766011000 |
| H  | -3.044506000 | -2.745870000 | -1.881329000 |
| H  | -3.491865000 | -1.253305000 | -2.722544000 |
| H  | -4.615605000 | -2.005641000 | -1.597054000 |
| C  | -2.866080000 | -2.896028000 | 1.096458000  |
| H  | -3.929150000 | -3.107363000 | 1.275476000  |
| H  | -2.342442000 | -3.113454000 | 2.032583000  |
| H  | -2.527481000 | -3.616806000 | 0.343093000  |
| C  | -2.250308000 | -0.437848000 | 3.010049000  |
| H  | -3.216748000 | -0.554873000 | 3.518745000  |
| H  | -1.630596000 | -1.289948000 | 3.311622000  |
| H  | -1.790643000 | 0.467943000  | 3.418971000  |
| C  | 3.092318000  | 0.501070000  | -0.727890000 |
| C  | 4.397429000  | 0.586318000  | -0.234134000 |
| C  | 4.823874000  | -0.309384000 | 0.737776000  |
| C  | 3.949680000  | -1.311118000 | 1.141977000  |
| C  | 2.662339000  | -1.347675000 | 0.603657000  |
| N  | 2.212286000  | -0.414771000 | -0.265254000 |
| H  | 5.829453000  | -0.250159000 | 1.145206000  |
| H  | 5.069053000  | 1.344123000  | -0.627306000 |
| H  | 4.257695000  | -2.071660000 | 1.853511000  |
| C  | 2.678594000  | 1.415085000  | -1.846865000 |
| H  | 3.468560000  | 1.453231000  | -2.604871000 |
| H  | 1.766138000  | 1.061143000  | -2.328846000 |
| H  | 2.517237000  | 2.442159000  | -1.501206000 |
| C  | 0.294607000  | -2.164352000 | 0.798426000  |
| H  | -0.320178000 | -3.003500000 | 1.126549000  |
| H  | 0.063898000  | -1.342713000 | 1.531920000  |
| C  | 1.758349000  | -2.518110000 | 0.895681000  |
| H  | 2.004669000  | -2.909885000 | 1.892945000  |
| C  | 1.988276000  | -3.641347000 | -0.138119000 |
| H  | 1.447223000  | -4.534636000 | 0.199983000  |
| H  | 3.045866000  | -3.914459000 | -0.221342000 |
| C  | 1.432721000  | -3.150057000 | -1.469736000 |
| H  | 1.345887000  | -3.983078000 | -2.180663000 |
| H  | 2.114256000  | -2.423347000 | -1.923598000 |

---

|   |              |              |              |
|---|--------------|--------------|--------------|
| C | 0.059172000  | -2.530114000 | -1.352479000 |
| C | -0.301579000 | -1.417991000 | -2.151438000 |
| H | -0.738655000 | -3.237303000 | -1.127706000 |
| H | -1.263279000 | -1.431398000 | -2.654837000 |
| H | 0.505990000  | -0.931477000 | -2.702174000 |
| C | 0.641296000  | 2.564266000  | 0.915031000  |
| C | 0.899087000  | 3.936297000  | 0.837179000  |
| C | 0.552137000  | 4.646412000  | -0.306286000 |
| C | -0.049147000 | 3.964521000  | -1.362926000 |
| C | -0.271702000 | 2.603779000  | -1.216911000 |
| N | 0.058496000  | 1.909923000  | -0.112349000 |
| H | 0.742903000  | 5.713916000  | -0.370748000 |
| H | 1.364759000  | 4.437160000  | 1.680385000  |
| H | -0.340961000 | 4.470109000  | -2.277473000 |
| C | 1.018333000  | 1.776006000  | 2.134442000  |
| H | 1.968872000  | 1.251286000  | 1.981610000  |
| H | 1.133993000  | 2.427875000  | 3.004595000  |
| H | 0.255230000  | 1.027884000  | 2.377071000  |
| H | -0.737944000 | 2.037107000  | -2.019578000 |

69

J1,  $E_{(\text{SCRF})} = -1245.426077$  a.u.

|    |              |              |              |
|----|--------------|--------------|--------------|
| Sc | -1.193487000 | -0.264983000 | -0.219744000 |
| C  | -2.286981000 | -0.894188000 | 1.886710000  |
| C  | -3.097079000 | 0.108898000  | 1.276760000  |
| C  | -3.603261000 | -0.424379000 | 0.050860000  |
| C  | -3.123463000 | -1.759460000 | -0.088326000 |
| C  | -2.300189000 | -2.045353000 | 1.041490000  |
| C  | -3.466066000 | 1.437336000  | 1.872625000  |
| H  | -3.627609000 | 2.204534000  | 1.108454000  |
| H  | -2.701454000 | 1.812524000  | 2.560590000  |
| H  | -4.398276000 | 1.356243000  | 2.446901000  |
| C  | -4.561606000 | 0.259668000  | -0.881619000 |
| H  | -5.596799000 | -0.024481000 | -0.650518000 |
| H  | -4.383057000 | -0.011694000 | -1.927883000 |
| H  | -4.508412000 | 1.350420000  | -0.801313000 |
| C  | -3.535049000 | -2.740852000 | -1.143800000 |
| H  | -2.731156000 | -3.439020000 | -1.399613000 |
| H  | -3.845963000 | -2.242430000 | -2.066151000 |
| H  | -4.385545000 | -3.342503000 | -0.795895000 |
| C  | -1.692292000 | -3.380829000 | 1.366897000  |
| H  | -2.417916000 | -4.015148000 | 1.893360000  |
| H  | -0.818148000 | -3.292926000 | 2.021362000  |
| H  | -1.387948000 | -3.928664000 | 0.468894000  |
| C  | -1.649615000 | -0.825904000 | 3.246851000  |
| H  | -2.261753000 | -1.361532000 | 3.984402000  |
| H  | -0.654209000 | -1.285264000 | 3.273860000  |
| H  | -1.552698000 | 0.202457000  | 3.608754000  |
| C  | 4.412483000  | 0.999948000  | 0.216113000  |
| C  | 5.535662000  | 0.549047000  | 0.917014000  |
| C  | 5.610167000  | -0.791032000 | 1.280410000  |



---

|   |              |              |              |
|---|--------------|--------------|--------------|
| C | 4.570816000  | -1.645366000 | 0.925401000  |
| C | 3.484452000  | -1.120651000 | 0.221312000  |
| N | 3.403095000  | 0.175475000  | -0.107695000 |
| H | 6.467369000  | -1.165909000 | 1.833246000  |
| H | 6.332806000  | 1.241163000  | 1.172220000  |
| H | 4.600802000  | -2.699787000 | 1.185734000  |
| C | 4.303525000  | 2.429240000  | -0.239681000 |
| H | 4.831341000  | 3.111481000  | 0.433780000  |
| H | 4.746243000  | 2.544447000  | -1.237476000 |
| H | 3.255984000  | 2.734532000  | -0.313883000 |
| C | 0.998920000  | -1.346829000 | -0.352867000 |
| H | 0.451329000  | -1.559050000 | 0.593209000  |
| H | 1.212869000  | -0.259939000 | -0.431432000 |
| C | 2.379069000  | -2.040454000 | -0.264785000 |
| H | 2.317033000  | -2.885506000 | 0.429193000  |
| C | 2.640467000  | -2.586840000 | -1.706988000 |
| H | 2.556317000  | -3.679286000 | -1.701975000 |
| H | 3.647586000  | -2.341787000 | -2.056347000 |
| C | 1.548762000  | -1.972031000 | -2.583269000 |
| H | 1.332572000  | -2.557756000 | -3.482354000 |
| H | 1.838265000  | -0.963791000 | -2.907731000 |
| C | 0.314213000  | -1.863709000 | -1.671041000 |
| C | -0.845708000 | -1.004487000 | -2.200903000 |
| H | -0.051691000 | -2.879338000 | -1.462285000 |
| H | -1.534680000 | -1.580598000 | -2.820943000 |
| H | -0.436011000 | -0.179689000 | -2.810389000 |
| C | -0.192446000 | 2.770130000  | 0.431394000  |
| C | -0.097249000 | 4.145607000  | 0.215994000  |
| C | -0.717968000 | 4.718158000  | -0.889667000 |
| C | -1.426071000 | 3.901220000  | -1.769126000 |
| C | -1.484414000 | 2.543560000  | -1.495664000 |
| N | -0.889843000 | 1.986570000  | -0.421947000 |
| H | -0.649491000 | 5.788285000  | -1.063358000 |
| H | 0.462457000  | 4.757168000  | 0.916625000  |
| H | -1.923037000 | 4.302148000  | -2.646034000 |
| C | 0.493499000  | 2.096231000  | 1.582707000  |
| H | 1.398274000  | 1.575501000  | 1.241278000  |
| H | 0.794881000  | 2.818655000  | 2.345600000  |
| H | -0.164122000 | 1.362551000  | 2.065384000  |
| H | -2.021155000 | 1.864244000  | -2.153967000 |

69

H2,  $E_{\text{(SCRF)}} = -1245.430943$  a.u.

|    |             |              |              |
|----|-------------|--------------|--------------|
| Sc | 0.464919000 | -0.412710000 | 0.015635000  |
| C  | 1.720028000 | -2.371894000 | -0.871347000 |
| C  | 2.626902000 | -1.641303000 | -0.047113000 |
| C  | 2.144948000 | -1.696974000 | 1.296004000  |
| C  | 0.934653000 | -2.454671000 | 1.298504000  |
| C  | 0.674969000 | -2.868706000 | -0.043104000 |
| C  | 3.949961000 | -1.066534000 | -0.465236000 |
| H  | 4.210914000 | -0.167178000 | 0.103058000  |

---

|   |              |              |              |
|---|--------------|--------------|--------------|
| H | 3.973623000  | -0.804787000 | -1.527934000 |
| H | 4.756309000  | -1.793670000 | -0.300541000 |
| C | 2.893887000  | -1.192865000 | 2.498073000  |
| H | 3.700607000  | -1.888078000 | 2.766531000  |
| H | 2.255162000  | -1.101208000 | 3.382492000  |
| H | 3.368401000  | -0.219815000 | 2.323203000  |
| C | 0.156291000  | -2.916190000 | 2.499757000  |
| H | -0.927943000 | -2.831686000 | 2.360119000  |
| H | 0.421665000  | -2.361144000 | 3.403999000  |
| H | 0.366195000  | -3.974211000 | 2.704788000  |
| C | -0.418797000 | -3.802134000 | -0.468971000 |
| H | -0.107347000 | -4.846592000 | -0.330887000 |
| H | -0.674951000 | -3.678487000 | -1.525306000 |
| H | -1.333772000 | -3.662473000 | 0.116682000  |
| C | 1.898235000  | -2.702239000 | -2.325377000 |
| H | 2.283185000  | -3.723990000 | -2.441693000 |
| H | 0.957098000  | -2.648987000 | -2.882880000 |
| H | 2.617995000  | -2.039945000 | -2.816525000 |
| C | -1.459853000 | 1.158760000  | 2.175920000  |
| C | -2.426394000 | 2.091494000  | 2.534545000  |
| C | -3.251250000 | 2.618660000  | 1.546525000  |
| C | -3.110163000 | 2.176532000  | 0.239139000  |
| C | -2.143747000 | 1.217368000  | -0.074899000 |
| N | -1.310804000 | 0.749663000  | 0.893058000  |
| H | -4.001711000 | 3.363718000  | 1.796445000  |
| H | -2.521686000 | 2.399817000  | 3.571101000  |
| H | -3.749216000 | 2.573163000  | -0.540307000 |
| C | -0.569620000 | 0.555064000  | 3.224469000  |
| H | -0.241479000 | 1.305758000  | 3.950526000  |
| H | -1.107336000 | -0.223107000 | 3.779413000  |
| H | 0.320029000  | 0.079723000  | 2.797005000  |
| C | -1.062070000 | -0.551571000 | -1.527499000 |
| H | -1.676604000 | -1.392832000 | -1.167492000 |
| H | -0.785974000 | -0.794157000 | -2.562127000 |
| C | -1.911587000 | 0.727993000  | -1.498554000 |
| H | -1.324316000 | 1.538940000  | -1.967570000 |
| C | 2.130761000  | 1.974952000  | -1.543893000 |
| C | 2.863539000  | 3.163233000  | -1.615843000 |
| C | 3.153980000  | 3.875538000  | -0.459032000 |
| C | 2.705760000  | 3.382806000  | 0.765513000  |
| C | 1.987902000  | 2.198069000  | 0.765280000  |
| N | 1.700343000  | 1.502031000  | -0.352305000 |
| H | 3.724615000  | 4.798413000  | -0.509938000 |
| H | 3.202013000  | 3.518177000  | -2.584286000 |
| H | 2.909692000  | 3.897990000  | 1.698162000  |
| C | 1.782569000  | 1.206867000  | -2.783368000 |
| H | 0.778240000  | 1.472145000  | -3.135330000 |
| H | 2.485044000  | 1.429453000  | -3.591102000 |
| H | 1.792320000  | 0.127303000  | -2.607126000 |
| H | 1.628600000  | 1.777425000  | 1.701660000  |

---

|   |              |              |              |
|---|--------------|--------------|--------------|
| C | -3.195960000 | 0.637650000  | -2.365481000 |
| H | -2.855737000 | 0.553260000  | -3.405314000 |
| H | -3.759993000 | 1.579457000  | -2.323746000 |
| C | -4.144247000 | -0.541108000 | -2.091595000 |
| H | -3.618537000 | -1.488750000 | -2.256312000 |
| H | -4.933296000 | -0.495125000 | -2.857048000 |
| C | -4.794795000 | -0.552843000 | -0.739157000 |
| C | -4.758815000 | -1.572097000 | 0.122513000  |
| H | -5.374481000 | 0.334265000  | -0.476766000 |
| H | -5.288667000 | -1.539360000 | 1.071075000  |
| H | -4.221260000 | -2.491519000 | -0.104281000 |

69

TS4b,  $E_{(\text{SCRF})} = -1245.397317$  a.u.,  $\text{IF} = i179.2473$  cm<sup>-1</sup>

|    |              |              |              |
|----|--------------|--------------|--------------|
| Sc | -1.047231000 | -0.278760000 | -0.150748000 |
| C  | -2.653414000 | -0.567961000 | 1.666471000  |
| C  | -2.885823000 | 0.746298000  | 1.157095000  |
| C  | -3.373712000 | 0.619810000  | -0.178177000 |
| C  | -3.452136000 | -0.767848000 | -0.492797000 |
| C  | -3.002011000 | -1.502742000 | 0.646176000  |
| C  | -2.803941000 | 2.028257000  | 1.935015000  |
| H  | -2.453012000 | 2.867527000  | 1.324981000  |
| H  | -2.141637000 | 1.946008000  | 2.802344000  |
| H  | -3.794015000 | 2.305729000  | 2.320406000  |
| C  | -3.870646000 | 1.742846000  | -1.041658000 |
| H  | -4.940623000 | 1.919955000  | -0.867636000 |
| H  | -3.758476000 | 1.526236000  | -2.110015000 |
| H  | -3.357543000 | 2.686858000  | -0.830142000 |
| C  | -4.102285000 | -1.355398000 | -1.710590000 |
| H  | -3.736904000 | -2.363674000 | -1.930359000 |
| H  | -3.951692000 | -0.740883000 | -2.604131000 |
| H  | -5.186719000 | -1.438309000 | -1.557847000 |
| C  | -3.038326000 | -2.998224000 | 0.788894000  |
| H  | -4.048547000 | -3.337554000 | 1.053795000  |
| H  | -2.368676000 | -3.353764000 | 1.578812000  |
| H  | -2.763969000 | -3.514262000 | -0.138309000 |
| C  | -2.251635000 | -0.916713000 | 3.072723000  |
| H  | -3.139649000 | -1.086322000 | 3.695865000  |
| H  | -1.649586000 | -1.830186000 | 3.120419000  |
| H  | -1.678039000 | -0.117480000 | 3.554241000  |
| C  | 4.164555000  | 0.269331000  | -0.427269000 |
| C  | 5.114479000  | 0.196362000  | 0.597450000  |
| C  | 4.972119000  | -0.778882000 | 1.578617000  |
| C  | 3.893402000  | -1.655909000 | 1.507151000  |
| C  | 2.986415000  | -1.522397000 | 0.451557000  |
| N  | 3.119547000  | -0.571371000 | -0.484419000 |
| H  | 5.697504000  | -0.861334000 | 2.383842000  |
| H  | 5.952721000  | 0.886706000  | 0.615092000  |
| H  | 3.760634000  | -2.437840000 | 2.249640000  |
| C  | 4.275645000  | 1.284066000  | -1.532120000 |
| H  | 5.115557000  | 1.965869000  | -1.373083000 |

---

|   |              |              |              |
|---|--------------|--------------|--------------|
| H | 4.420543000  | 0.782614000  | -2.496098000 |
| H | 3.356307000  | 1.874967000  | -1.611673000 |
| C | 0.474831000  | -1.754897000 | 0.417927000  |
| H | -0.324065000 | -2.490636000 | 0.628806000  |
| H | 0.490562000  | -1.056457000 | 1.292349000  |
| C | 1.812688000  | -2.478424000 | 0.318840000  |
| H | 1.896412000  | -3.184068000 | 1.155968000  |
| C | 0.662320000  | 2.413817000  | 0.721402000  |
| C | 1.164771000  | 3.705484000  | 0.545446000  |
| C | 0.865099000  | 4.421060000  | -0.607517000 |
| C | 0.052693000  | 3.829260000  | -1.572210000 |
| C | -0.417165000 | 2.547943000  | -1.331884000 |
| N | -0.124865000 | 1.842717000  | -0.220001000 |
| H | 1.252930000  | 5.425882000  | -0.748538000 |
| H | 1.787941000  | 4.140272000  | 1.320546000  |
| H | -0.218857000 | 4.345354000  | -2.486944000 |
| C | 0.998147000  | 1.622486000  | 1.949796000  |
| H | 1.800124000  | 0.904432000  | 1.740351000  |
| H | 1.341564000  | 2.277374000  | 2.754835000  |
| H | 0.128546000  | 1.069187000  | 2.321730000  |
| H | -1.068148000 | 2.063357000  | -2.054100000 |
| C | 1.866569000  | -3.302519000 | -1.005250000 |
| H | 1.873446000  | -4.374792000 | -0.785236000 |
| H | 2.805196000  | -3.084653000 | -1.525073000 |
| C | 0.690345000  | -2.968477000 | -1.924458000 |
| H | -0.209388000 | -3.540285000 | -1.662821000 |
| H | 0.938478000  | -3.254199000 | -2.957014000 |
| C | 0.388092000  | -1.499992000 | -1.932993000 |
| C | -0.807933000 | -0.947752000 | -2.376189000 |
| H | 1.273502000  | -0.862519000 | -1.875225000 |
| H | -0.786774000 | 0.037352000  | -2.845752000 |
| H | -1.625411000 | -1.595240000 | -2.686070000 |

69

J2,  $E_{\text{(SCRF)}} = -1245.424945$  a.u.

|    |             |              |              |
|----|-------------|--------------|--------------|
| Sc | 1.206378000 | -0.389500000 | 0.209542000  |
| C  | 1.728445000 | -1.357431000 | -1.979254000 |
| C  | 2.688355000 | -0.327466000 | -1.748799000 |
| C  | 3.471188000 | -0.704472000 | -0.615293000 |
| C  | 3.015642000 | -1.976250000 | -0.157589000 |
| C  | 1.932035000 | -2.374934000 | -0.996138000 |
| C  | 2.947417000 | 0.869322000  | -2.618936000 |
| H  | 3.165307000 | 1.772773000  | -2.038331000 |
| H  | 2.105189000 | 1.091924000  | -3.281214000 |
| H  | 3.816714000 | 0.689490000  | -3.264929000 |
| C  | 4.658207000 | 0.045171000  | -0.082216000 |
| H  | 5.581268000 | -0.299638000 | -0.567278000 |
| H  | 4.793462000 | -0.105705000 | 0.994345000  |
| H  | 4.585850000 | 1.121900000  | -0.268316000 |
| C  | 3.662463000 | -2.812800000 | 0.905084000  |
| H  | 2.954248000 | -3.502715000 | 1.373330000  |

---

|   |              |              |              |
|---|--------------|--------------|--------------|
| H | 4.101703000  | -2.202791000 | 1.700214000  |
| H | 4.470576000  | -3.419615000 | 0.474910000  |
| C | 1.217793000  | -3.695269000 | -0.925002000 |
| H | 1.794277000  | -4.473362000 | -1.442684000 |
| H | 0.233455000  | -3.661745000 | -1.403913000 |
| H | 1.079739000  | -4.037249000 | 0.106717000  |
| C | 0.755078000  | -1.426526000 | -3.123323000 |
| H | 1.190280000  | -1.976224000 | -3.968277000 |
| H | -0.172204000 | -1.944017000 | -2.854333000 |
| H | 0.481114000  | -0.435289000 | -3.499704000 |
| C | -4.429228000 | 1.064827000  | -0.883547000 |
| C | -5.611476000 | 0.413968000  | -1.248856000 |
| C | -5.786548000 | -0.918949000 | -0.894139000 |
| C | -4.784608000 | -1.559014000 | -0.172838000 |
| C | -3.637913000 | -0.836771000 | 0.167029000  |
| N | -3.460065000 | 0.441391000  | -0.192777000 |
| H | -6.692683000 | -1.450316000 | -1.172365000 |
| H | -6.376343000 | 0.947568000  | -1.805160000 |
| H | -4.890270000 | -2.596739000 | 0.131062000  |
| C | -4.186710000 | 2.499715000  | -1.264166000 |
| H | -5.119301000 | 3.008854000  | -1.523252000 |
| H | -3.711468000 | 3.040769000  | -0.439941000 |
| H | -3.523716000 | 2.564790000  | -2.136742000 |
| C | -1.127208000 | -0.991266000 | 0.772264000  |
| H | -0.608459000 | -1.798494000 | 0.210930000  |
| H | -1.201594000 | -0.091619000 | 0.131091000  |
| C | -2.578709000 | -1.474504000 | 1.041065000  |
| H | -2.616088000 | -2.559453000 | 0.885590000  |
| C | 0.648124000  | 2.793817000  | -0.221972000 |
| C | 0.785017000  | 4.154225000  | 0.058311000  |
| C | 1.615085000  | 4.568169000  | 1.094708000  |
| C | 2.300882000  | 3.609490000  | 1.838716000  |
| C | 2.124657000  | 2.275709000  | 1.506148000  |
| N | 1.322682000  | 1.870396000  | 0.500606000  |
| H | 1.726832000  | 5.625270000  | 1.318457000  |
| H | 0.238787000  | 4.878205000  | -0.538086000 |
| H | 2.959165000  | 3.884633000  | 2.655809000  |
| C | -0.267116000 | 2.296567000  | -1.300437000 |
| H | -1.224509000 | 1.957783000  | -0.880399000 |
| H | -0.486202000 | 3.083430000  | -2.027168000 |
| H | 0.182613000  | 1.459627000  | -1.849087000 |
| H | 2.637099000  | 1.490707000  | 2.056815000  |
| C | -2.789019000 | -1.209168000 | 2.549541000  |
| H | -3.569493000 | -1.851288000 | 2.970045000  |
| H | -3.098130000 | -0.166777000 | 2.699108000  |
| C | -1.406536000 | -1.444451000 | 3.148131000  |
| H | -1.168099000 | -2.516809000 | 3.161808000  |
| H | -1.297609000 | -1.070143000 | 4.171100000  |
| C | -0.453440000 | -0.718654000 | 2.178160000  |
| C | 1.034276000  | -1.099114000 | 2.234651000  |

---

|                                             |              |              |              |
|---------------------------------------------|--------------|--------------|--------------|
| H                                           | -0.566450000 | 0.359337000  | 2.374624000  |
| H                                           | 1.548692000  | -0.618150000 | 3.074662000  |
| H                                           | 1.147084000  | -2.185567000 | 2.347568000  |
| 55                                          |              |              |              |
| H3, $E_{(\text{SCRF})} = -957.9484622$ a.u. |              |              |              |
| Sc                                          | -0.392634000 | -0.152620000 | -0.107708000 |
| C                                           | -2.216405000 | 0.167543000  | 1.492168000  |
| C                                           | -1.978566000 | 1.423971000  | 0.847664000  |
| C                                           | -2.346808000 | 1.288260000  | -0.525051000 |
| C                                           | -2.789581000 | -0.053686000 | -0.730744000 |
| C                                           | -2.708993000 | -0.743534000 | 0.516975000  |
| C                                           | -1.567036000 | 2.687194000  | 1.553547000  |
| H                                           | -2.414225000 | 3.109887000  | 2.109187000  |
| H                                           | -1.228098000 | 3.461655000  | 0.858653000  |
| H                                           | -0.764550000 | 2.520227000  | 2.281297000  |
| C                                           | -2.428098000 | 2.380940000  | -1.554778000 |
| H                                           | -3.475806000 | 2.658562000  | -1.729025000 |
| H                                           | -2.017764000 | 2.084480000  | -2.528100000 |
| H                                           | -1.911422000 | 3.291263000  | -1.237512000 |
| C                                           | -3.444477000 | -0.562819000 | -1.983376000 |
| H                                           | -3.012843000 | -0.127590000 | -2.891743000 |
| H                                           | -4.511117000 | -0.301567000 | -1.986195000 |
| H                                           | -3.392795000 | -1.653458000 | -2.070004000 |
| C                                           | -3.165349000 | -2.149484000 | 0.778466000  |
| H                                           | -4.225651000 | -2.165961000 | 1.063458000  |
| H                                           | -2.605372000 | -2.616631000 | 1.594405000  |
| H                                           | -3.065103000 | -2.789982000 | -0.104474000 |
| C                                           | -2.117812000 | -0.084504000 | 2.967728000  |
| H                                           | -3.063789000 | 0.177338000  | 3.460073000  |
| H                                           | -1.914901000 | -1.134870000 | 3.195960000  |
| H                                           | -1.335694000 | 0.518239000  | 3.441561000  |
| C                                           | 2.235019000  | 1.787333000  | -0.544037000 |
| C                                           | 3.548005000  | 2.193591000  | -0.336542000 |
| C                                           | 4.405329000  | 1.376708000  | 0.398258000  |
| C                                           | 3.931029000  | 0.169536000  | 0.892659000  |
| C                                           | 2.606391000  | -0.200745000 | 0.654299000  |
| N                                           | 1.772890000  | 0.614622000  | -0.041519000 |
| H                                           | 5.431446000  | 1.683075000  | 0.581813000  |
| H                                           | 3.889256000  | 3.140492000  | -0.742112000 |
| H                                           | 4.572802000  | -0.489714000 | 1.469047000  |
| C                                           | 1.276542000  | 2.611294000  | -1.352981000 |
| H                                           | 1.105955000  | 2.161539000  | -2.340275000 |
| H                                           | 0.306881000  | 2.706722000  | -0.851157000 |
| H                                           | 1.660606000  | 3.620754000  | -1.519662000 |
| C                                           | 0.550152000  | -1.473981000 | 1.346520000  |
| H                                           | 0.156283000  | -2.464680000 | 1.603888000  |
| H                                           | 0.354217000  | -0.836049000 | 2.230005000  |
| C                                           | 2.064875000  | -1.531227000 | 1.131322000  |
| H                                           | 2.585000000  | -1.756658000 | 2.075976000  |
| C                                           | 2.482968000  | -2.662671000 | 0.162190000  |

---

|   |              |              |              |
|---|--------------|--------------|--------------|
| H | 2.083851000  | -3.603185000 | 0.563305000  |
| H | 3.574781000  | -2.765409000 | 0.160898000  |
| C | 2.024803000  | -2.487242000 | -1.290659000 |
| H | 2.376077000  | -3.364092000 | -1.856632000 |
| H | 2.504511000  | -1.616503000 | -1.754616000 |
| C | 0.545886000  | -2.426306000 | -1.497162000 |
| C | -0.093511000 | -1.527994000 | -2.280608000 |
| H | -0.038584000 | -3.224733000 | -1.036782000 |
| H | -1.144793000 | -1.641302000 | -2.530298000 |
| H | 0.469744000  | -0.772250000 | -2.833596000 |

55

TS4c,  $E_{(\text{SCRF})} = -957.9383673$  a.u., IF =  $i268.1511$  cm<sup>-1</sup>

|    |              |              |              |
|----|--------------|--------------|--------------|
| Sc | -0.415967000 | -0.143716000 | -0.214348000 |
| C  | -2.092664000 | 0.235710000  | 1.532561000  |
| C  | -1.978994000 | 1.452014000  | 0.792998000  |
| C  | -2.448229000 | 1.200779000  | -0.533860000 |
| C  | -2.852534000 | -0.166334000 | -0.609645000 |
| C  | -2.623357000 | -0.765092000 | 0.664763000  |
| C  | -1.597469000 | 2.781625000  | 1.383669000  |
| H  | -2.417626000 | 3.174811000  | 1.998605000  |
| H  | -1.393241000 | 3.535623000  | 0.617347000  |
| H  | -0.717211000 | 2.720043000  | 2.034418000  |
| C  | -2.645597000 | 2.210974000  | -1.629631000 |
| H  | -3.704334000 | 2.492131000  | -1.702368000 |
| H  | -2.355055000 | 1.825211000  | -2.613899000 |
| H  | -2.086285000 | 3.134713000  | -1.453804000 |
| C  | -3.577237000 | -0.791824000 | -1.764674000 |
| H  | -3.215930000 | -0.428347000 | -2.732498000 |
| H  | -4.648908000 | -0.557248000 | -1.713977000 |
| H  | -3.493963000 | -1.883355000 | -1.763818000 |
| C  | -2.991622000 | -2.169424000 | 1.051035000  |
| H  | -4.040100000 | -2.222189000 | 1.372498000  |
| H  | -2.385137000 | -2.543050000 | 1.882436000  |
| H  | -2.879907000 | -2.870348000 | 0.216616000  |
| C  | -1.839567000 | 0.096186000  | 3.007546000  |
| H  | -2.710371000 | 0.446371000  | 3.577648000  |
| H  | -1.666000000 | -0.943316000 | 3.302942000  |
| H  | -0.982166000 | 0.689518000  | 3.346098000  |
| C  | 2.147995000  | 1.838812000  | -0.546044000 |
| C  | 3.435151000  | 2.314972000  | -0.325144000 |
| C  | 4.340546000  | 1.526596000  | 0.382136000  |
| C  | 3.942364000  | 0.273459000  | 0.827439000  |
| C  | 2.641130000  | -0.162461000 | 0.574957000  |
| N  | 1.755398000  | 0.627114000  | -0.078368000 |
| H  | 5.346957000  | 1.886546000  | 0.576520000  |
| H  | 3.720325000  | 3.291453000  | -0.702826000 |
| H  | 4.627413000  | -0.371069000 | 1.369749000  |
| C  | 1.144356000  | 2.618128000  | -1.344473000 |
| H  | 1.012040000  | 2.177094000  | -2.341503000 |
| H  | 0.166052000  | 2.644811000  | -0.849324000 |

---

|   |              |              |              |
|---|--------------|--------------|--------------|
| H | 1.463058000  | 3.653703000  | -1.487009000 |
| C | 0.697393000  | -1.716081000 | 0.954687000  |
| H | 0.391808000  | -2.674800000 | 1.378049000  |
| H | 0.208069000  | -0.955559000 | 1.620944000  |
| C | 2.202517000  | -1.550207000 | 0.986140000  |
| H | 2.604554000  | -1.744368000 | 1.991007000  |
| C | 2.762977000  | -2.617196000 | 0.020604000  |
| H | 2.588197000  | -3.604188000 | 0.466778000  |
| H | 3.843464000  | -2.516368000 | -0.127187000 |
| C | 2.004528000  | -2.481522000 | -1.295131000 |
| H | 2.185381000  | -3.354329000 | -1.936230000 |
| H | 2.366355000  | -1.609268000 | -1.854747000 |
| C | 0.507882000  | -2.364480000 | -1.104739000 |
| C | -0.255727000 | -1.538658000 | -1.970107000 |
| H | 0.018263000  | -3.266102000 | -0.741630000 |
| H | -1.237803000 | -1.881900000 | -2.283098000 |
| H | 0.296575000  | -0.973853000 | -2.728379000 |

55

J3,  $E_{\text{(SCRF)}} = -957.9536195$  a.u.

|    |              |              |              |
|----|--------------|--------------|--------------|
| Sc | -0.477265000 | -0.085500000 | -0.344291000 |
| C  | -1.983493000 | 0.188254000  | 1.553382000  |
| C  | -2.043244000 | 1.397906000  | 0.801489000  |
| C  | -2.604567000 | 1.088725000  | -0.477708000 |
| C  | -2.916615000 | -0.305548000 | -0.502821000 |
| C  | -2.527703000 | -0.862279000 | 0.747317000  |
| C  | -1.707469000 | 2.762702000  | 1.335372000  |
| H  | -2.515105000 | 3.125823000  | 1.984482000  |
| H  | -1.588371000 | 3.505712000  | 0.540591000  |
| H  | -0.792425000 | 2.768373000  | 1.939095000  |
| C  | -2.963192000 | 2.063287000  | -1.565605000 |
| H  | -4.042254000 | 2.264546000  | -1.556132000 |
| H  | -2.724996000 | 1.682741000  | -2.566072000 |
| H  | -2.462055000 | 3.028756000  | -1.445569000 |
| C  | -3.648497000 | -1.011007000 | -1.604674000 |
| H  | -3.339498000 | -0.665051000 | -2.596529000 |
| H  | -4.729321000 | -0.834415000 | -1.521798000 |
| H  | -3.495296000 | -2.093190000 | -1.569515000 |
| C  | -2.744251000 | -2.285731000 | 1.171813000  |
| H  | -3.772767000 | -2.429819000 | 1.527466000  |
| H  | -2.082149000 | -2.579674000 | 1.992436000  |
| H  | -2.588551000 | -2.988977000 | 0.347046000  |
| C  | -1.552876000 | 0.085302000  | 2.990004000  |
| H  | -2.375929000 | 0.369072000  | 3.659138000  |
| H  | -1.259788000 | -0.932808000 | 3.265797000  |
| H  | -0.713218000 | 0.750637000  | 3.221959000  |
| C  | 1.918342000  | 1.919479000  | -0.619776000 |
| C  | 3.114970000  | 2.570305000  | -0.352495000 |
| C  | 4.090440000  | 1.910427000  | 0.394135000  |
| C  | 3.853466000  | 0.611738000  | 0.820595000  |
| C  | 2.635105000  | -0.003192000 | 0.519419000  |



---

|   |              |              |              |
|---|--------------|--------------|--------------|
| N | 1.675744000  | 0.665084000  | -0.159613000 |
| H | 5.029472000  | 2.403866000  | 0.628328000  |
| H | 3.279722000  | 3.576197000  | -0.724763000 |
| H | 4.603938000  | 0.062882000  | 1.381172000  |
| C | 0.847535000  | 2.538971000  | -1.472030000 |
| H | 0.814996000  | 2.065851000  | -2.462835000 |
| H | -0.149736000 | 2.459262000  | -1.013687000 |
| H | 1.024611000  | 3.606072000  | -1.628356000 |
| C | 0.979611000  | -1.967738000 | 0.757866000  |
| H | 0.875834000  | -2.845234000 | 1.403257000  |
| H | 0.234868000  | -1.291291000 | 1.238009000  |
| C | 2.418694000  | -1.450585000 | 0.892658000  |
| H | 2.795421000  | -1.593587000 | 1.912044000  |
| C | 3.163143000  | -2.377992000 | -0.103467000 |
| H | 3.263317000  | -3.369067000 | 0.355921000  |
| H | 4.170020000  | -2.024884000 | -0.347867000 |
| C | 2.225804000  | -2.424828000 | -1.309780000 |
| H | 2.424526000  | -3.274419000 | -1.969914000 |
| H | 2.358762000  | -1.517029000 | -1.913785000 |
| C | 0.783800000  | -2.469806000 | -0.753526000 |
| C | -0.257658000 | -1.759574000 | -1.654995000 |
| H | 0.476002000  | -3.514903000 | -0.646622000 |
| H | -1.112088000 | -2.405331000 | -1.870186000 |
| H | 0.196329000  | -1.483078000 | -2.618750000 |

55

H4,  $E_{(\text{SCRF})} = -957.9447328$  a.u.

|    |              |              |              |
|----|--------------|--------------|--------------|
| Sc | -0.369484000 | -0.133109000 | -0.065980000 |
| C  | -2.229031000 | 0.182444000  | 1.483839000  |
| C  | -1.992867000 | 1.434282000  | 0.828823000  |
| C  | -2.327096000 | 1.277982000  | -0.549417000 |
| C  | -2.751757000 | -0.071778000 | -0.748493000 |
| C  | -2.693502000 | -0.744415000 | 0.510197000  |
| C  | -1.612228000 | 2.708749000  | 1.531761000  |
| H  | -2.468693000 | 3.107078000  | 2.091078000  |
| H  | -1.300101000 | 3.492327000  | 0.834693000  |
| H  | -0.802334000 | 2.565907000  | 2.256813000  |
| C  | -2.387076000 | 2.353556000  | -1.598012000 |
| H  | -3.431187000 | 2.617484000  | -1.810786000 |
| H  | -1.942742000 | 2.045512000  | -2.552823000 |
| H  | -1.888594000 | 3.273690000  | -1.280337000 |
| C  | -3.375295000 | -0.600434000 | -2.009020000 |
| H  | -2.914367000 | -0.187789000 | -2.913059000 |
| H  | -4.439083000 | -0.330731000 | -2.045956000 |
| H  | -3.328800000 | -1.692294000 | -2.074541000 |
| C  | -3.143855000 | -2.150043000 | 0.782313000  |
| H  | -4.208460000 | -2.169676000 | 1.050460000  |
| H  | -2.593691000 | -2.602560000 | 1.612881000  |
| H  | -3.025969000 | -2.802031000 | -0.089835000 |
| C  | -2.150487000 | -0.050755000 | 2.963455000  |
| H  | -3.102857000 | 0.216201000  | 3.440700000  |

---

|   |              |              |              |
|---|--------------|--------------|--------------|
| H | -1.948649000 | -1.097886000 | 3.206095000  |
| H | -1.374154000 | 0.557987000  | 3.438918000  |
| C | 2.258462000  | 1.807246000  | -0.478591000 |
| C | 3.591318000  | 2.161945000  | -0.307998000 |
| C | 4.446329000  | 1.291190000  | 0.365611000  |
| C | 3.949022000  | 0.084952000  | 0.838141000  |
| C | 2.603387000  | -0.233486000 | 0.640135000  |
| N | 1.776583000  | 0.634348000  | 0.004524000  |
| H | 5.488596000  | 1.556410000  | 0.520057000  |
| H | 3.950048000  | 3.110504000  | -0.694157000 |
| H | 4.588876000  | -0.613866000 | 1.368366000  |
| C | 1.299447000  | 2.687880000  | -1.224401000 |
| H | 1.709095000  | 3.690759000  | -1.368344000 |
| H | 1.081963000  | 2.279287000  | -2.220287000 |
| H | 0.350744000  | 2.791123000  | -0.686382000 |
| C | 0.535131000  | -1.459190000 | 1.415654000  |
| H | 0.107256000  | -2.455884000 | 1.586867000  |
| H | 0.409443000  | -0.912745000 | 2.365223000  |
| C | 2.038632000  | -1.559491000 | 1.114930000  |
| H | 2.602705000  | -1.797062000 | 2.030272000  |
| C | 2.401558000  | -2.705138000 | 0.125536000  |
| H | 2.460987000  | -3.635153000 | 0.702189000  |
| H | 3.407913000  | -2.535305000 | -0.278948000 |
| C | 1.420293000  | -2.967756000 | -1.028362000 |
| H | 0.493430000  | -3.416255000 | -0.652808000 |
| H | 1.882009000  | -3.726194000 | -1.680067000 |
| C | 1.092565000  | -1.798065000 | -1.901244000 |
| C | -0.148218000 | -1.480160000 | -2.325342000 |
| H | 1.933521000  | -1.195112000 | -2.249256000 |
| H | -0.318817000 | -0.686711000 | -3.051828000 |
| H | -1.003413000 | -2.109269000 | -2.078385000 |

55

TS4d,  $E_{\text{(SCRF)}} = -957.9143371$  a.u., IF =  $i346.1277$  cm<sup>-1</sup>

|    |              |              |              |
|----|--------------|--------------|--------------|
| Sc | -0.462972000 | -0.119235000 | -0.265905000 |
| C  | -2.096265000 | 0.195107000  | 1.523068000  |
| C  | -2.005240000 | 1.436533000  | 0.819513000  |
| C  | -2.493844000 | 1.222013000  | -0.505335000 |
| C  | -2.887806000 | -0.148216000 | -0.618362000 |
| C  | -2.640893000 | -0.779493000 | 0.637435000  |
| C  | -1.635425000 | 2.750053000  | 1.452021000  |
| H  | -2.428403000 | 3.077219000  | 2.137009000  |
| H  | -1.512778000 | 3.547174000  | 0.712920000  |
| H  | -0.712601000 | 2.694711000  | 2.041534000  |
| C  | -2.701675000 | 2.261122000  | -1.571980000 |
| H  | -3.760488000 | 2.545815000  | -1.626735000 |
| H  | -2.424158000 | 1.901106000  | -2.570065000 |
| H  | -2.137147000 | 3.178241000  | -1.378884000 |
| C  | -3.609287000 | -0.748937000 | -1.788644000 |
| H  | -3.246808000 | -0.361998000 | -2.746906000 |
| H  | -4.681820000 | -0.518807000 | -1.735100000 |

---

|   |              |              |              |
|---|--------------|--------------|--------------|
| H | -3.515915000 | -1.838229000 | -1.813813000 |
| C | -2.990182000 | -2.196038000 | 0.990729000  |
| H | -4.034085000 | -2.264807000 | 1.323849000  |
| H | -2.370660000 | -2.583432000 | 1.805976000  |
| H | -2.882358000 | -2.874107000 | 0.137979000  |
| C | -1.815208000 | 0.012011000  | 2.987948000  |
| H | -2.692854000 | 0.298571000  | 3.582557000  |
| H | -1.587210000 | -1.028160000 | 3.241123000  |
| H | -0.981791000 | 0.633134000  | 3.335435000  |
| C | 2.169263000  | 1.935008000  | -0.492197000 |
| C | 3.481469000  | 2.384950000  | -0.368593000 |
| C | 4.436608000  | 1.546281000  | 0.196922000  |
| C | 4.056363000  | 0.276431000  | 0.614457000  |
| C | 2.730427000  | -0.126808000 | 0.469011000  |
| N | 1.796726000  | 0.706966000  | -0.061716000 |
| H | 5.464867000  | 1.878701000  | 0.307979000  |
| H | 3.745008000  | 3.378214000  | -0.717485000 |
| H | 4.777088000  | -0.405140000 | 1.056363000  |
| C | 1.118062000  | 2.772812000  | -1.160924000 |
| H | 1.394457000  | 3.830444000  | -1.173700000 |
| H | 0.979963000  | 2.463601000  | -2.206211000 |
| H | 0.152558000  | 2.695369000  | -0.647028000 |
| C | 0.786720000  | -1.580873000 | 0.864636000  |
| H | 0.377024000  | -2.536840000 | 1.199164000  |
| H | 0.354393000  | -0.801529000 | 1.546756000  |
| C | 2.287946000  | -1.510937000 | 0.918441000  |
| H | 2.669285000  | -1.648275000 | 1.939887000  |
| C | 2.807756000  | -2.697600000 | 0.037949000  |
| H | 3.148598000  | -3.514105000 | 0.680844000  |
| H | 3.670268000  | -2.386262000 | -0.561688000 |
| C | 1.655175000  | -3.165561000 | -0.876276000 |
| H | 1.046097000  | -3.950700000 | -0.415220000 |
| H | 2.047875000  | -3.583178000 | -1.812222000 |
| C | 0.836024000  | -1.949081000 | -1.220809000 |
| C | -0.428020000 | -1.780850000 | -1.835720000 |
| H | 1.532093000  | -1.154004000 | -1.517212000 |
| H | -0.450738000 | -1.185656000 | -2.753941000 |
| H | -1.166259000 | -2.579461000 | -1.796899000 |

55

J4,  $E_{\text{(SCRF)}} = -957.945136$  a.u.

|    |              |              |              |
|----|--------------|--------------|--------------|
| Sc | -0.569664000 | -0.232489000 | -0.481050000 |
| C  | -1.816082000 | 0.306005000  | 1.535248000  |
| C  | -1.828652000 | 1.482408000  | 0.727841000  |
| C  | -2.551063000 | 1.179832000  | -0.467459000 |
| C  | -3.005384000 | -0.174614000 | -0.382241000 |
| C  | -2.559377000 | -0.709780000 | 0.856578000  |
| C  | -1.323168000 | 2.824742000  | 1.175897000  |
| H  | -1.958902000 | 3.216469000  | 1.980389000  |
| H  | -1.341769000 | 3.565627000  | 0.371954000  |
| H  | -0.301409000 | 2.783680000  | 1.571503000  |

---

|                                                             |              |              |              |
|-------------------------------------------------------------|--------------|--------------|--------------|
| C                                                           | -2.917546000 | 2.134735000  | -1.571056000 |
| H                                                           | -3.976064000 | 2.414651000  | -1.495993000 |
| H                                                           | -2.781085000 | 1.702649000  | -2.570360000 |
| H                                                           | -2.340682000 | 3.063403000  | -1.528685000 |
| C                                                           | -3.888587000 | -0.860594000 | -1.381809000 |
| H                                                           | -3.731825000 | -0.483341000 | -2.397692000 |
| H                                                           | -4.946708000 | -0.693977000 | -1.139116000 |
| H                                                           | -3.721823000 | -1.940987000 | -1.401190000 |
| C                                                           | -2.903530000 | -2.059128000 | 1.411428000  |
| H                                                           | -3.788427000 | -1.989738000 | 2.057901000  |
| H                                                           | -2.097114000 | -2.479915000 | 2.022268000  |
| H                                                           | -3.134458000 | -2.778680000 | 0.621600000  |
| C                                                           | -1.277125000 | 0.229609000  | 2.936376000  |
| H                                                           | -2.012157000 | 0.624215000  | 3.650634000  |
| H                                                           | -1.061402000 | -0.798785000 | 3.244123000  |
| H                                                           | -0.363414000 | 0.821023000  | 3.062951000  |
| C                                                           | 1.922236000  | 1.931251000  | -0.626052000 |
| C                                                           | 3.117994000  | 2.586419000  | -0.341071000 |
| C                                                           | 4.102578000  | 1.916140000  | 0.376055000  |
| C                                                           | 3.878886000  | 0.596698000  | 0.750429000  |
| C                                                           | 2.664148000  | -0.014147000 | 0.440807000  |
| N                                                           | 1.677919000  | 0.671070000  | -0.195425000 |
| H                                                           | 5.039195000  | 2.408534000  | 0.621638000  |
| H                                                           | 3.272365000  | 3.602254000  | -0.690614000 |
| H                                                           | 4.640558000  | 0.030611000  | 1.278093000  |
| C                                                           | 0.890194000  | 2.563817000  | -1.513237000 |
| H                                                           | 0.955758000  | 3.655021000  | -1.501099000 |
| H                                                           | 1.036279000  | 2.241213000  | -2.553197000 |
| H                                                           | -0.132265000 | 2.303292000  | -1.210369000 |
| C                                                           | 1.006171000  | -1.890298000 | 0.672062000  |
| H                                                           | 0.805442000  | -2.843461000 | 1.175116000  |
| H                                                           | 0.345371000  | -1.179300000 | 1.215007000  |
| C                                                           | 2.467828000  | -1.485053000 | 0.772176000  |
| H                                                           | 2.878116000  | -1.659753000 | 1.771979000  |
| C                                                           | 3.155549000  | -2.442443000 | -0.274455000 |
| H                                                           | 3.759052000  | -3.194978000 | 0.240696000  |
| H                                                           | 3.835409000  | -1.881953000 | -0.924387000 |
| C                                                           | 2.004710000  | -3.090847000 | -1.091526000 |
| H                                                           | 1.752122000  | -4.087453000 | -0.712054000 |
| H                                                           | 2.246306000  | -3.193011000 | -2.153362000 |
| C                                                           | 0.821279000  | -2.133676000 | -0.856017000 |
| C                                                           | -0.620400000 | -2.282090000 | -1.265389000 |
| H                                                           | 1.202793000  | -1.215461000 | -1.370714000 |
| H                                                           | -0.746442000 | -2.414210000 | -2.347605000 |
| H                                                           | -1.159270000 | -3.066764000 | -0.726901000 |
| 69                                                          |              |              |              |
| K1 <sub>cis</sub> , E <sub>(SCRF)</sub> = -1245.444822 a.u. |              |              |              |
| Sc                                                          | 0.206767000  | 0.289699000  | 0.169300000  |
| C                                                           | 2.056960000  | 1.892461000  | 0.674625000  |
| C                                                           | 1.160866000  | 2.576688000  | -0.200580000 |

---

|   |              |              |              |
|---|--------------|--------------|--------------|
| C | -0.078220000 | 2.743980000  | 0.486744000  |
| C | 0.057213000  | 2.162195000  | 1.782833000  |
| C | 1.381629000  | 1.653962000  | 1.904848000  |
| C | 1.580810000  | 3.219106000  | -1.494013000 |
| H | 2.230463000  | 4.081224000  | -1.291968000 |
| H | 0.733225000  | 3.595221000  | -2.073633000 |
| H | 2.156297000  | 2.544349000  | -2.139894000 |
| C | -1.251253000 | 3.580172000  | 0.055464000  |
| H | -1.309766000 | 4.489011000  | 0.668257000  |
| H | -2.212355000 | 3.064233000  | 0.163683000  |
| H | -1.162992000 | 3.906136000  | -0.983972000 |
| C | -0.971771000 | 2.241554000  | 2.872050000  |
| H | -1.992383000 | 2.233445000  | 2.474108000  |
| H | -0.859051000 | 3.175012000  | 3.440280000  |
| H | -0.887072000 | 1.416895000  | 3.585805000  |
| C | 2.017362000  | 1.144147000  | 3.164329000  |
| H | 2.569561000  | 1.952483000  | 3.662230000  |
| H | 2.737561000  | 0.338337000  | 2.983091000  |
| H | 1.277597000  | 0.774821000  | 3.879506000  |
| C | 3.520164000  | 1.683787000  | 0.414673000  |
| H | 4.085011000  | 2.595771000  | 0.651664000  |
| H | 3.940618000  | 0.882961000  | 1.030903000  |
| H | 3.728225000  | 1.441803000  | -0.633097000 |
| C | -2.365579000 | 0.802673000  | -1.789733000 |
| C | -3.719640000 | 1.092133000  | -1.917426000 |
| C | -4.649091000 | 0.288040000  | -1.265281000 |
| C | -4.190387000 | -0.823250000 | -0.577811000 |
| C | -2.816930000 | -1.079751000 | -0.484334000 |
| N | -1.907518000 | -0.217001000 | -1.010352000 |
| H | -5.712598000 | 0.499205000  | -1.334580000 |
| H | -4.034640000 | 1.925508000  | -2.537299000 |
| H | -4.886589000 | -1.523390000 | -0.126392000 |
| C | -1.368628000 | 1.547892000  | -2.625704000 |
| H | -0.404665000 | 1.675055000  | -2.125135000 |
| H | -1.187769000 | 0.993386000  | -3.555541000 |
| H | -1.737715000 | 2.538487000  | -2.901676000 |
| C | -0.919607000 | -2.756739000 | 0.129137000  |
| H | -0.798689000 | -3.824931000 | -0.089783000 |
| H | -0.347589000 | -2.228123000 | -0.643317000 |
| C | -2.416847000 | -2.418910000 | 0.105890000  |
| H | -2.934075000 | -3.140424000 | -0.540679000 |
| C | -2.898346000 | -2.636448000 | 1.582141000  |
| H | -3.711264000 | -3.366658000 | 1.636531000  |
| H | -3.287125000 | -1.701805000 | 2.000684000  |
| C | -1.648284000 | -3.104872000 | 2.351528000  |
| H | -1.575607000 | -4.200389000 | 2.320294000  |
| H | -1.669181000 | -2.805037000 | 3.404319000  |
| C | -0.478291000 | -2.472750000 | 1.574274000  |
| C | -0.320600000 | -0.973769000 | 1.866474000  |
| H | 0.465589000  | -2.987973000 | 1.795322000  |

---

|   |              |              |              |
|---|--------------|--------------|--------------|
| H | 0.215388000  | -0.837102000 | 2.812733000  |
| H | -1.318826000 | -0.525214000 | 2.049375000  |
| C | 2.256913000  | -1.308563000 | -1.965578000 |
| C | 3.321972000  | -2.165114000 | -2.248039000 |
| C | 4.060188000  | -2.723244000 | -1.209561000 |
| C | 3.714804000  | -2.411761000 | 0.102744000  |
| C | 2.647817000  | -1.550946000 | 0.312169000  |
| N | 1.929891000  | -1.004952000 | -0.688733000 |
| H | 4.889776000  | -3.391470000 | -1.422288000 |
| H | 3.562263000  | -2.390488000 | -3.282240000 |
| H | 4.255627000  | -2.822793000 | 0.948619000  |
| C | 1.432995000  | -0.702232000 | -3.061788000 |
| H | 1.745935000  | -1.072047000 | -4.041256000 |
| H | 0.371467000  | -0.945522000 | -2.934142000 |
| H | 1.532990000  | 0.389316000  | -3.070472000 |
| H | 2.336332000  | -1.281950000 | 1.317804000  |

69

TS5acis,  $E_{\text{(SCRF)}} = -1245.41035$  a.u., IF =  $i1268.5138$  cm<sup>-1</sup>

|    |              |              |              |
|----|--------------|--------------|--------------|
| Sc | 0.311595000  | 0.177263000  | 0.184496000  |
| C  | 2.285521000  | 1.380506000  | 1.095368000  |
| C  | 1.551236000  | 2.308491000  | 0.304071000  |
| C  | 0.284591000  | 2.519912000  | 0.936307000  |
| C  | 0.249850000  | 1.725668000  | 2.120036000  |
| C  | 1.487262000  | 1.024118000  | 2.219466000  |
| C  | 2.137114000  | 3.095446000  | -0.835059000 |
| H  | 2.850680000  | 3.836446000  | -0.450900000 |
| H  | 1.379699000  | 3.650432000  | -1.395383000 |
| H  | 2.689424000  | 2.467083000  | -1.543445000 |
| C  | -0.739188000 | 3.557881000  | 0.571970000  |
| H  | -0.593632000 | 4.462812000  | 1.177175000  |
| H  | -1.765251000 | 3.218484000  | 0.750119000  |
| H  | -0.667532000 | 3.864131000  | -0.475138000 |
| C  | -0.843464000 | 1.759362000  | 3.148644000  |
| H  | -1.835733000 | 1.877191000  | 2.698224000  |
| H  | -0.702932000 | 2.609412000  | 3.829800000  |
| H  | -0.862764000 | 0.855660000  | 3.764609000  |
| C  | 1.961264000  | 0.202597000  | 3.381824000  |
| H  | 2.646661000  | 0.790803000  | 4.006048000  |
| H  | 2.506607000  | -0.693564000 | 3.065738000  |
| H  | 1.138492000  | -0.116517000 | 4.027358000  |
| C  | 3.718004000  | 0.997822000  | 0.869042000  |
| H  | 4.389756000  | 1.776251000  | 1.255681000  |
| H  | 3.978358000  | 0.064719000  | 1.376801000  |
| H  | 3.949431000  | 0.874133000  | -0.194541000 |
| C  | -1.948611000 | 1.280718000  | -1.814594000 |
| C  | -3.185477000 | 1.853396000  | -2.090685000 |
| C  | -4.339175000 | 1.223828000  | -1.635273000 |
| C  | -4.212006000 | 0.003170000  | -0.992480000 |
| C  | -2.943606000 | -0.533416000 | -0.739502000 |
| N  | -1.817981000 | 0.149789000  | -1.069455000 |

---

|   |              |              |              |
|---|--------------|--------------|--------------|
| H | -5.318937000 | 1.653599000  | -1.824294000 |
| H | -3.237461000 | 2.767120000  | -2.674159000 |
| H | -5.090279000 | -0.563791000 | -0.698798000 |
| C | -0.714217000 | 1.838132000  | -2.459021000 |
| H | 0.186295000  | 1.738414000  | -1.844848000 |
| H | -0.524101000 | 1.298524000  | -3.394958000 |
| H | -0.831877000 | 2.896163000  | -2.706089000 |
| C | -1.541366000 | -2.673985000 | -0.208948000 |
| H | -1.696352000 | -3.692427000 | -0.583419000 |
| H | -0.816294000 | -2.208758000 | -0.887445000 |
| C | -2.900997000 | -1.944175000 | -0.185232000 |
| H | -3.596323000 | -2.493470000 | -0.831808000 |
| C | -3.414042000 | -2.067743000 | 1.289409000  |
| H | -4.440089000 | -2.444975000 | 1.331246000  |
| H | -3.423018000 | -1.086741000 | 1.777937000  |
| C | -2.415554000 | -3.012143000 | 1.978897000  |
| H | -2.710849000 | -4.057108000 | 1.817877000  |
| H | -2.360142000 | -2.848673000 | 3.060496000  |
| C | -1.087775000 | -2.728287000 | 1.256799000  |
| C | -0.463391000 | -1.405347000 | 1.703891000  |
| H | -0.364630000 | -3.539241000 | 1.413382000  |
| H | -0.051336000 | -1.489604000 | 2.714639000  |
| H | -1.253761000 | -0.633372000 | 1.785569000  |
| C | 2.385199000  | -1.182233000 | -2.296113000 |
| C | 3.332260000  | -2.202407000 | -2.205325000 |
| C | 3.511267000  | -2.885547000 | -1.001387000 |
| C | 2.736099000  | -2.547507000 | 0.104709000  |
| C | 1.808734000  | -1.518430000 | -0.041254000 |
| N | 1.648756000  | -0.871761000 | -1.208209000 |
| H | 4.251673000  | -3.678639000 | -0.934768000 |
| H | 3.925351000  | -2.459069000 | -3.077598000 |
| H | 2.846196000  | -3.069447000 | 1.050699000  |
| C | 2.138402000  | -0.427112000 | -3.566765000 |
| H | 2.848246000  | -0.720146000 | -4.344025000 |
| H | 1.126493000  | -0.624336000 | -3.939644000 |
| H | 2.229682000  | 0.652424000  | -3.407580000 |
| H | 0.813741000  | -1.458942000 | 0.921901000  |

69

L1cis,  $E_{(\text{SCRF})} = -1245.463311$  a.u.

|    |             |              |              |
|----|-------------|--------------|--------------|
| Sc | 0.539356000 | 0.232390000  | -0.174762000 |
| C  | 2.560731000 | 1.619581000  | 0.058864000  |
| C  | 2.459885000 | 1.249800000  | -1.314302000 |
| C  | 1.288578000 | 1.870460000  | -1.854437000 |
| C  | 0.666970000 | 2.610121000  | -0.806968000 |
| C  | 1.447808000 | 2.448282000  | 0.378639000  |
| C  | 3.500171000 | 0.488382000  | -2.086388000 |
| H  | 4.303401000 | 1.160507000  | -2.416177000 |
| H  | 3.093597000 | 0.016215000  | -2.986343000 |
| H  | 3.970773000 | -0.294436000 | -1.482171000 |
| C  | 0.885633000 | 1.930302000  | -3.302117000 |

---

|   |              |              |              |
|---|--------------|--------------|--------------|
| H | 1.128046000  | 2.914960000  | -3.723353000 |
| H | -0.189921000 | 1.779969000  | -3.455455000 |
| H | 1.419494000  | 1.193829000  | -3.910149000 |
| C | -0.484996000 | 3.556867000  | -0.983221000 |
| H | -1.182087000 | 3.225851000  | -1.760591000 |
| H | -0.118297000 | 4.546745000  | -1.287305000 |
| H | -1.052049000 | 3.700144000  | -0.058296000 |
| C | 1.217900000  | 3.148195000  | 1.686543000  |
| H | 1.711341000  | 4.129390000  | 1.692864000  |
| H | 1.617664000  | 2.577546000  | 2.529879000  |
| H | 0.154584000  | 3.325787000  | 1.880584000  |
| C | 3.689895000  | 1.275810000  | 0.983055000  |
| H | 4.457535000  | 2.060723000  | 0.962827000  |
| H | 3.353143000  | 1.175819000  | 2.019434000  |
| H | 4.179676000  | 0.338479000  | 0.702549000  |
| C | -0.728473000 | -1.988379000 | -2.126443000 |
| C | -1.583273000 | -2.975625000 | -2.608065000 |
| C | -2.809289000 | -3.171666000 | -1.982944000 |
| C | -3.145485000 | -2.382280000 | -0.889728000 |
| C | -2.255550000 | -1.403606000 | -0.447481000 |
| N | -1.067087000 | -1.211508000 | -1.070844000 |
| H | -3.493736000 | -3.936129000 | -2.340031000 |
| H | -1.284512000 | -3.578771000 | -3.459295000 |
| H | -4.089154000 | -2.525156000 | -0.376608000 |
| C | 0.606882000  | -1.737335000 | -2.761550000 |
| H | 0.605195000  | -0.792058000 | -3.315071000 |
| H | 1.407705000  | -1.697768000 | -2.010827000 |
| H | 0.867202000  | -2.531745000 | -3.465864000 |
| C | -2.153722000 | 0.940571000  | 0.606885000  |
| H | -1.188093000 | 1.147308000  | 1.105811000  |
| H | -2.079987000 | 1.228563000  | -0.450567000 |
| C | -2.544269000 | -0.554794000 | 0.765543000  |
| H | -1.931854000 | -0.969964000 | 1.581702000  |
| C | -4.002801000 | -0.529172000 | 1.254884000  |
| H | -4.282531000 | -1.437300000 | 1.798760000  |
| H | -4.690091000 | -0.423892000 | 0.405720000  |
| C | -4.048905000 | 0.726792000  | 2.125008000  |
| H | -3.549958000 | 0.531614000  | 3.083050000  |
| H | -5.069674000 | 1.052582000  | 2.349355000  |
| C | -3.262192000 | 1.777233000  | 1.316357000  |
| C | -4.152059000 | 2.521501000  | 0.317925000  |
| H | -2.807476000 | 2.514804000  | 1.987681000  |
| H | -4.929826000 | 3.087456000  | 0.842050000  |
| H | -4.651744000 | 1.832614000  | -0.374322000 |
| C | 2.253951000  | -2.376767000 | 1.323764000  |
| C | 2.349633000  | -2.666671000 | 2.681691000  |
| C | 1.688994000  | -1.859730000 | 3.614267000  |
| C | 0.939268000  | -0.770684000 | 3.181654000  |
| C | 0.864573000  | -0.505879000 | 1.809538000  |
| N | 1.515663000  | -1.312120000 | 0.941544000  |



---

|   |              |              |              |
|---|--------------|--------------|--------------|
| H | 1.769595000  | -2.089509000 | 4.674209000  |
| H | 2.938561000  | -3.518488000 | 3.008270000  |
| H | 0.424354000  | -0.134434000 | 3.896430000  |
| C | 2.920696000  | -3.206185000 | 0.266986000  |
| H | 3.578678000  | -3.958227000 | 0.709689000  |
| H | 2.175313000  | -3.730150000 | -0.343885000 |
| H | 3.519031000  | -2.580592000 | -0.404430000 |
| H | -3.573736000 | 3.232183000  | -0.282766000 |

30

Pcis,  $E_{(\text{SCRF})} = -522.0036133$  a.u.

|   |              |              |              |
|---|--------------|--------------|--------------|
| C | -2.463849000 | 0.850069000  | -0.027230000 |
| C | -3.391916000 | -0.174464000 | -0.243487000 |
| C | -2.934184000 | -1.486268000 | -0.315882000 |
| C | -1.573077000 | -1.734648000 | -0.172538000 |
| C | -0.709324000 | -0.654576000 | 0.040490000  |
| N | -1.154804000 | 0.606522000  | 0.110993000  |
| H | -3.630561000 | -2.305105000 | -0.481279000 |
| H | -4.448263000 | 0.056267000  | -0.350415000 |
| H | -1.180326000 | -2.746700000 | -0.223411000 |
| C | -2.886452000 | 2.291812000  | 0.065958000  |
| H | -2.367250000 | 2.890715000  | -0.690712000 |
| H | -3.965149000 | 2.410634000  | -0.073987000 |
| H | -2.613827000 | 2.706239000  | 1.043316000  |
| C | 1.613834000  | -0.163845000 | -0.903655000 |
| H | 1.548260000  | -0.673005000 | -1.872916000 |
| H | 1.244360000  | 0.862335000  | -1.036271000 |
| C | 0.780232000  | -0.851634000 | 0.191441000  |
| H | 0.989595000  | -1.929646000 | 0.154459000  |
| C | 1.364759000  | -0.266903000 | 1.504165000  |
| H | 1.355968000  | -1.012382000 | 2.307027000  |
| H | 0.737008000  | 0.568827000  | 1.828599000  |
| C | 2.792542000  | 0.224029000  | 1.159190000  |
| H | 3.558466000  | -0.206707000 | 1.814294000  |
| H | 2.855401000  | 1.313686000  | 1.277124000  |
| C | 3.030676000  | -0.145396000 | -0.320393000 |
| C | 4.008714000  | 0.771179000  | -1.046384000 |
| H | 3.422092000  | -1.173988000 | -0.360448000 |
| H | 4.995882000  | 0.761171000  | -0.568228000 |
| H | 3.646954000  | 1.807512000  | -1.042260000 |
| H | 4.143291000  | 0.468364000  | -2.091903000 |

69

K2trans,  $E_{(\text{SCRF})} = -1245.43409$  a.u.

|    |              |             |              |
|----|--------------|-------------|--------------|
| Sc | -0.519091000 | 0.350990000 | -0.206894000 |
| C  | -2.336166000 | 1.630608000 | 0.838867000  |
| C  | -1.299677000 | 1.548122000 | 1.819780000  |
| C  | -0.173883000 | 2.269074000 | 1.326138000  |
| C  | -0.516280000 | 2.790345000 | 0.041478000  |
| C  | -1.861875000 | 2.418504000 | -0.247675000 |
| C  | -1.506743000 | 0.987960000 | 3.199864000  |
| H  | -2.295746000 | 1.549226000 | 3.716955000  |

---

|   |              |              |              |
|---|--------------|--------------|--------------|
| H | -0.608398000 | 1.062612000  | 3.817453000  |
| H | -1.824437000 | -0.062515000 | 3.196362000  |
| C | 1.097589000  | 2.596386000  | 2.058530000  |
| H | 1.999956000  | 2.269139000  | 1.528111000  |
| H | 1.118983000  | 2.146728000  | 3.053725000  |
| H | 1.184392000  | 3.681471000  | 2.195437000  |
| C | 0.342260000  | 3.713281000  | -0.774882000 |
| H | 1.407881000  | 3.572360000  | -0.565990000 |
| H | 0.108008000  | 4.762202000  | -0.548026000 |
| H | 0.191771000  | 3.578726000  | -1.850870000 |
| C | -2.697176000 | 2.931741000  | -1.381871000 |
| H | -3.332322000 | 3.759339000  | -1.038610000 |
| H | -3.361949000 | 2.168294000  | -1.800560000 |
| H | -2.083954000 | 3.317640000  | -2.200308000 |
| C | -3.750222000 | 1.172161000  | 1.049807000  |
| H | -4.297367000 | 1.897679000  | 1.667503000  |
| H | -4.301071000 | 1.083185000  | 0.108520000  |
| H | -3.806832000 | 0.207301000  | 1.565333000  |
| C | 2.648282000  | -0.741995000 | 1.824831000  |
| C | 3.995832000  | -0.825290000 | 2.176948000  |
| C | 4.951643000  | -0.978800000 | 1.181239000  |
| C | 4.521979000  | -1.068839000 | -0.134334000 |
| C | 3.158668000  | -0.968911000 | -0.426375000 |
| N | 2.231007000  | -0.773098000 | 0.537921000  |
| H | 6.007413000  | -1.047040000 | 1.428486000  |
| H | 4.280251000  | -0.782679000 | 3.224022000  |
| H | 5.229577000  | -1.224229000 | -0.943699000 |
| C | 1.614490000  | -0.687826000 | 2.909607000  |
| H | 1.425936000  | -1.694955000 | 3.303216000  |
| H | 1.948471000  | -0.073117000 | 3.750685000  |
| H | 0.668802000  | -0.287294000 | 2.540789000  |
| C | 1.224866000  | -1.135301000 | -2.054731000 |
| H | 0.932607000  | -1.645950000 | -2.980796000 |
| H | 0.703974000  | -1.664868000 | -1.242506000 |
| C | 2.736530000  | -1.134149000 | -1.876161000 |
| H | 3.173840000  | -2.080185000 | -2.216482000 |
| C | 3.224417000  | 0.039577000  | -2.798496000 |
| H | 3.780840000  | -0.345019000 | -3.658117000 |
| H | 3.904488000  | 0.701081000  | -2.251776000 |
| C | 1.948134000  | 0.791044000  | -3.241330000 |
| H | 1.623240000  | 0.470133000  | -4.237962000 |
| H | 2.079295000  | 1.876694000  | -3.273616000 |
| C | 0.883481000  | 0.353029000  | -2.220932000 |
| C | -0.590502000 | 0.614322000  | -2.379416000 |
| H | 1.254091000  | 0.872150000  | -1.280022000 |
| H | -0.814413000 | 1.595351000  | -2.802345000 |
| H | -1.065258000 | -0.163871000 | -2.989833000 |
| C | -1.822738000 | -2.702746000 | 0.466252000  |
| C | -2.767011000 | -3.711805000 | 0.262823000  |
| C | -3.834771000 | -3.502697000 | -0.601682000 |

---

|   |              |              |              |
|---|--------------|--------------|--------------|
| C | -3.937824000 | -2.277232000 | -1.255340000 |
| C | -2.963996000 | -1.321595000 | -1.012913000 |
| N | -1.924920000 | -1.515173000 | -0.173715000 |
| H | -4.571681000 | -4.283914000 | -0.765257000 |
| H | -2.653880000 | -4.656124000 | 0.786072000  |
| H | -4.748913000 | -2.063178000 | -1.943249000 |
| C | -0.680805000 | -2.902694000 | 1.416479000  |
| H | -0.497168000 | -3.966637000 | 1.589001000  |
| H | 0.244995000  | -2.454848000 | 1.039473000  |
| H | -0.904845000 | -2.446726000 | 2.388753000  |
| H | -2.993295000 | -0.358698000 | -1.513571000 |

69

TS5btrans,  $E_{(\text{SCRF})} = -1245.400686$  a.u., IF =  $i1225.8134$  cm<sup>-1</sup>

|    |              |              |              |
|----|--------------|--------------|--------------|
| Sc | 0.494939000  | -0.316588000 | -0.113067000 |
| C  | 2.324567000  | -1.188357000 | 1.287642000  |
| C  | 1.337955000  | -0.662983000 | 2.173744000  |
| C  | 0.159909000  | -1.460646000 | 2.040419000  |
| C  | 0.428049000  | -2.479171000 | 1.076297000  |
| C  | 1.770186000  | -2.319557000 | 0.624251000  |
| C  | 1.635038000  | 0.372299000  | 3.222767000  |
| H  | 2.375419000  | -0.020312000 | 3.931905000  |
| H  | 0.750569000  | 0.641292000  | 3.804482000  |
| H  | 2.057514000  | 1.294619000  | 2.806822000  |
| C  | -1.080729000 | -1.400901000 | 2.885930000  |
| H  | -2.002587000 | -1.420766000 | 2.293838000  |
| H  | -1.108363000 | -0.504094000 | 3.508891000  |
| H  | -1.117077000 | -2.263150000 | 3.564389000  |
| C  | -0.489634000 | -3.620778000 | 0.744570000  |
| H  | -1.541756000 | -3.358399000 | 0.897089000  |
| H  | -0.280093000 | -4.484045000 | 1.390570000  |
| H  | -0.376247000 | -3.964169000 | -0.288995000 |
| C  | 2.544594000  | -3.278454000 | -0.230843000 |
| H  | 3.214998000  | -3.881912000 | 0.395181000  |
| H  | 3.168902000  | -2.772397000 | -0.975166000 |
| H  | 1.893134000  | -3.978863000 | -0.761021000 |
| C  | 3.761087000  | -0.757779000 | 1.250266000  |
| H  | 4.316169000  | -1.211235000 | 2.083075000  |
| H  | 4.258309000  | -1.064755000 | 0.325896000  |
| H  | 3.871507000  | 0.327522000  | 1.345197000  |
| C  | -2.357509000 | 1.548407000  | 1.392075000  |
| C  | -3.664396000 | 1.772708000  | 1.828178000  |
| C  | -4.726506000 | 1.427624000  | 1.003461000  |
| C  | -4.441945000 | 0.910124000  | -0.252210000 |
| C  | -3.113404000 | 0.704852000  | -0.631088000 |
| N  | -2.079611000 | 0.969460000  | 0.201629000  |
| H  | -5.753245000 | 1.587928000  | 1.320498000  |
| H  | -3.834255000 | 2.227876000  | 2.799334000  |
| H  | -5.238159000 | 0.676498000  | -0.953204000 |
| C  | -1.216974000 | 2.041609000  | 2.230056000  |
| H  | -1.124117000 | 3.129568000  | 2.123242000  |

---

|   |              |              |              |
|---|--------------|--------------|--------------|
| H | -1.377447000 | 1.839301000  | 3.293106000  |
| H | -0.268343000 | 1.597069000  | 1.924549000  |
| C | -1.361212000 | 0.191495000  | -2.377107000 |
| H | -1.188880000 | 0.259097000  | -3.458546000 |
| H | -0.800834000 | 1.020906000  | -1.922140000 |
| C | -2.847666000 | 0.240179000  | -2.053060000 |
| H | -3.369515000 | 0.949861000  | -2.705547000 |
| C | -3.349320000 | -1.218082000 | -2.343185000 |
| H | -4.003141000 | -1.240753000 | -3.219642000 |
| H | -3.935751000 | -1.599048000 | -1.500593000 |
| C | -2.076648000 | -2.066764000 | -2.566549000 |
| H | -1.858524000 | -2.182991000 | -3.634805000 |
| H | -2.148494000 | -3.069220000 | -2.134953000 |
| C | -0.960211000 | -1.221044000 | -1.928886000 |
| C | 0.497734000  | -1.524392000 | -2.147831000 |
| H | -1.219711000 | -1.317418000 | -0.833324000 |
| H | 0.758462000  | -2.570090000 | -1.982419000 |
| H | 0.787761000  | -1.249805000 | -3.170045000 |
| C | 2.000238000  | 2.834610000  | -0.582839000 |
| C | 3.154803000  | 3.164316000  | -1.293162000 |
| C | 3.849122000  | 2.179323000  | -1.997369000 |
| C | 3.376548000  | 0.870031000  | -1.996429000 |
| C | 2.221545000  | 0.596798000  | -1.266931000 |
| N | 1.566960000  | 1.555730000  | -0.589892000 |
| H | 4.748686000  | 2.441018000  | -2.548657000 |
| H | 3.503833000  | 4.192297000  | -1.295374000 |
| H | 3.883515000  | 0.086240000  | -2.551533000 |
| C | 1.218016000  | 3.852383000  | 0.189431000  |
| H | 1.538739000  | 4.866788000  | -0.060444000 |
| H | 0.148696000  | 3.760475000  | -0.024303000 |
| H | 1.355673000  | 3.712767000  | 1.268184000  |
| H | 1.550072000  | -0.532783000 | -1.652897000 |

69

L2trans,  $E_{\text{(SCRF)}} = -1245.461814$  a.u.

|    |              |              |             |
|----|--------------|--------------|-------------|
| Sc | -0.609690000 | -0.079865000 | 0.151917000 |
| C  | -2.348769000 | 0.090900000  | 1.876378000 |
| C  | -2.384367000 | -1.241986000 | 1.371262000 |
| C  | -1.158599000 | -1.883379000 | 1.732921000 |
| C  | -0.363766000 | -0.939729000 | 2.444933000 |
| C  | -1.098468000 | 0.283080000  | 2.530934000 |
| C  | -3.576397000 | -1.897443000 | 0.733312000 |
| H  | -4.210819000 | -2.369467000 | 1.495286000 |
| H  | -3.299174000 | -2.682855000 | 0.021949000 |
| H  | -4.202526000 | -1.174242000 | 0.201863000 |
| C  | -0.824450000 | -3.339814000 | 1.573959000 |
| H  | 0.165838000  | -3.508835000 | 1.133512000 |
| H  | -1.562068000 | -3.862688000 | 0.957857000 |
| H  | -0.825078000 | -3.839154000 | 2.551617000 |
| C  | 0.935620000  | -1.256737000 | 3.128453000 |
| H  | 1.536696000  | -1.975889000 | 2.561035000 |

---

|   |              |              |              |
|---|--------------|--------------|--------------|
| H | 0.750184000  | -1.706711000 | 4.113283000  |
| H | 1.546866000  | -0.365137000 | 3.302894000  |
| C | -0.693730000 | 1.514570000  | 3.289175000  |
| H | -1.156881000 | 1.524598000  | 4.284684000  |
| H | -1.002789000 | 2.432033000  | 2.778029000  |
| H | 0.388747000  | 1.568711000  | 3.444212000  |
| C | -3.473460000 | 1.081175000  | 1.826480000  |
| H | -4.164154000 | 0.922217000  | 2.665442000  |
| H | -3.110512000 | 2.110733000  | 1.892292000  |
| H | -4.058850000 | 0.996149000  | 0.905378000  |
| C | 0.712317000  | -2.309771000 | -1.673114000 |
| C | 1.609229000  | -3.214854000 | -2.231377000 |
| C | 2.966032000  | -3.080027000 | -1.959969000 |
| C | 3.387484000  | -2.022229000 | -1.167156000 |
| C | 2.451147000  | -1.123843000 | -0.649186000 |
| N | 1.125708000  | -1.287627000 | -0.881404000 |
| H | 3.685150000  | -3.782328000 | -2.372086000 |
| H | 1.240174000  | -4.014907000 | -2.865271000 |
| H | 4.440529000  | -1.879137000 | -0.949422000 |
| C | -0.761361000 | -2.454085000 | -1.917363000 |
| H | -0.952037000 | -2.915758000 | -2.890649000 |
| H | -1.224466000 | -3.094871000 | -1.158817000 |
| H | -1.278806000 | -1.486526000 | -1.921456000 |
| C | 4.204998000  | 0.750906000  | -0.340547000 |
| H | 5.076658000  | 0.462227000  | 0.257560000  |
| H | 4.421800000  | 0.469874000  | -1.376365000 |
| C | 2.921959000  | 0.036443000  | 0.194137000  |
| H | 3.159411000  | -0.374560000 | 1.185750000  |
| C | 1.906353000  | 1.168953000  | 0.394965000  |
| H | 1.178523000  | 0.964516000  | 1.200745000  |
| H | 1.375200000  | 1.389433000  | -0.543169000 |
| C | 2.768599000  | 2.381573000  | 0.756259000  |
| H | 3.128608000  | 2.289656000  | 1.790436000  |
| H | 2.226559000  | 3.329071000  | 0.677144000  |
| C | 3.943653000  | 2.273398000  | -0.225520000 |
| C | 5.171956000  | 3.086326000  | 0.167048000  |
| H | 3.586949000  | 2.630617000  | -1.202420000 |
| H | 4.934935000  | 4.153761000  | 0.236526000  |
| H | 5.561594000  | 2.764104000  | 1.140782000  |
| C | -2.729939000 | 1.197751000  | -2.296263000 |
| C | -3.010302000 | 2.534602000  | -2.559200000 |
| C | -2.389586000 | 3.538669000  | -1.807826000 |
| C | -1.501670000 | 3.196255000  | -0.794463000 |
| C | -1.246609000 | 1.842100000  | -0.549042000 |
| N | -1.855141000 | 0.902333000  | -1.306712000 |
| H | -2.612018000 | 4.581910000  | -2.019951000 |
| H | -3.710631000 | 2.789773000  | -3.348894000 |
| H | -1.018214000 | 3.965939000  | -0.199126000 |
| C | -3.346150000 | 0.077067000  | -3.080487000 |
| H | -4.186339000 | 0.434065000  | -3.681760000 |

---

|   |              |              |              |
|---|--------------|--------------|--------------|
| H | -2.615548000 | -0.369234000 | -3.767046000 |
| H | -3.710057000 | -0.715587000 | -2.418535000 |
| H | 5.975718000  | 2.973492000  | -0.568966000 |

30

Ptrans,  $E_{\text{(SCRF)}} = -522.0039091$  a.u.

|   |              |              |              |
|---|--------------|--------------|--------------|
| C | -2.376531000 | 0.896451000  | 0.075563000  |
| C | -3.370189000 | -0.058881000 | -0.165119000 |
| C | -2.989818000 | -1.380629000 | -0.374569000 |
| C | -1.638195000 | -1.707421000 | -0.338366000 |
| C | -0.706200000 | -0.693553000 | -0.091343000 |
| N | -1.076774000 | 0.577652000  | 0.110678000  |
| H | -3.738284000 | -2.146356000 | -0.564994000 |
| H | -4.416719000 | 0.232477000  | -0.187264000 |
| H | -1.304780000 | -2.729128000 | -0.499629000 |
| C | -2.713765000 | 2.344937000  | 0.308063000  |
| H | -3.793889000 | 2.519347000  | 0.294637000  |
| H | -2.317180000 | 2.678088000  | 1.273666000  |
| H | -2.249790000 | 2.972906000  | -0.461265000 |
| C | 1.628655000  | -0.098457000 | -0.994116000 |
| H | 2.107459000  | -0.733999000 | -1.750617000 |
| H | 1.007732000  | 0.629086000  | -1.525409000 |
| C | 0.776209000  | -0.977701000 | -0.028796000 |
| H | 0.927946000  | -2.034450000 | -0.281373000 |
| C | 1.377339000  | -0.714116000 | 1.375155000  |
| H | 1.273600000  | -1.577814000 | 2.041781000  |
| H | 0.844981000  | 0.128789000  | 1.832788000  |
| C | 2.825763000  | -0.315124000 | 1.095218000  |
| H | 3.426180000  | -1.201595000 | 0.840105000  |
| H | 3.311501000  | 0.174395000  | 1.948108000  |
| C | 2.700727000  | 0.599767000  | -0.130007000 |
| C | 4.007893000  | 0.878551000  | -0.862917000 |
| H | 2.280694000  | 1.555057000  | 0.217239000  |
| H | 4.735520000  | 1.376194000  | -0.210158000 |
| H | 4.462969000  | -0.054551000 | -1.220501000 |
| H | 3.848144000  | 1.525044000  | -1.734459000 |

83

K3cis,  $E_{\text{(SCRF)}} = -1532.92197$  a.u.

|    |              |              |              |
|----|--------------|--------------|--------------|
| Sc | -1.490097000 | -0.309802000 | 0.084225000  |
| C  | -1.647295000 | -2.238145000 | 1.626167000  |
| C  | -2.650620000 | -1.318099000 | 2.060548000  |
| C  | -3.626225000 | -1.216544000 | 1.024299000  |
| C  | -3.229313000 | -2.074663000 | -0.040763000 |
| C  | -2.013593000 | -2.712714000 | 0.329905000  |
| C  | -2.805857000 | -0.731167000 | 3.437682000  |
| H  | -3.009941000 | 0.346925000  | 3.434611000  |
| H  | -1.922580000 | -0.896012000 | 4.062001000  |
| H  | -3.645590000 | -1.207997000 | 3.959477000  |
| C  | -4.946460000 | -0.510618000 | 1.132106000  |
| H  | -5.727457000 | -1.212511000 | 1.454650000  |
| H  | -5.277466000 | -0.088264000 | 0.177386000  |

---

|   |              |              |              |
|---|--------------|--------------|--------------|
| H | -4.925862000 | 0.297385000  | 1.869972000  |
| C | -4.022878000 | -2.371541000 | -1.279379000 |
| H | -3.379175000 | -2.608491000 | -2.133724000 |
| H | -4.674597000 | -1.539148000 | -1.564667000 |
| H | -4.672194000 | -3.243577000 | -1.122195000 |
| C | -1.365066000 | -3.847333000 | -0.403952000 |
| H | -1.925269000 | -4.776929000 | -0.233278000 |
| H | -0.341266000 | -4.021894000 | -0.062789000 |
| H | -1.331669000 | -3.684214000 | -1.485900000 |
| C | -0.495642000 | -2.777258000 | 2.430114000  |
| H | -0.676352000 | -3.825306000 | 2.701356000  |
| H | 0.452967000  | -2.750765000 | 1.880800000  |
| H | -0.349920000 | -2.234104000 | 3.368955000  |
| C | 5.865315000  | 1.134437000  | -0.384633000 |
| C | 6.880582000  | 0.557972000  | 0.387272000  |
| C | 6.774485000  | -0.783077000 | 0.739638000  |
| C | 5.664230000  | -1.505807000 | 0.313585000  |
| C | 4.692686000  | -0.856961000 | -0.454319000 |
| N | 4.794721000  | 0.437599000  | -0.787613000 |
| H | 7.548326000  | -1.259765000 | 1.336228000  |
| H | 7.736381000  | 1.150899000  | 0.697585000  |
| H | 5.551627000  | -2.556867000 | 0.565490000  |
| C | 5.938636000  | 2.571110000  | -0.827856000 |
| H | 4.962571000  | 3.055371000  | -0.721543000 |
| H | 6.681981000  | 3.136850000  | -0.258235000 |
| H | 6.211448000  | 2.629552000  | -1.888927000 |
| C | 2.138018000  | -0.932403000 | -0.593768000 |
| H | 1.887473000  | -1.070140000 | 0.467071000  |
| H | 2.222718000  | 0.146113000  | -0.782706000 |
| C | 3.475016000  | -1.590160000 | -0.966307000 |
| H | 3.486639000  | -2.606833000 | -0.550436000 |
| C | 3.408536000  | -1.681601000 | -2.516013000 |
| H | 3.892893000  | -2.595278000 | -2.875759000 |
| H | 3.952942000  | -0.835731000 | -2.947320000 |
| C | 1.908382000  | -1.611374000 | -2.888103000 |
| H | 1.586453000  | -2.447853000 | -3.518879000 |
| H | 1.701778000  | -0.693969000 | -3.454936000 |
| C | 1.125024000  | -1.571928000 | -1.551977000 |
| C | -0.250979000 | -0.901771000 | -1.626082000 |
| H | 0.986155000  | -2.612228000 | -1.224821000 |
| H | -0.881532000 | -1.477518000 | -2.328290000 |
| H | -0.118857000 | 0.090422000  | -2.110611000 |
| C | -3.512817000 | 2.250793000  | -0.506903000 |
| C | -4.383730000 | 3.020635000  | -1.280961000 |
| C | -4.597301000 | 2.698486000  | -2.616245000 |
| C | -3.930667000 | 1.601533000  | -3.157910000 |
| C | -3.085219000 | 0.875254000  | -2.333594000 |
| N | -2.875197000 | 1.180667000  | -1.036059000 |
| H | -5.272731000 | 3.293487000  | -3.224363000 |
| H | -4.886316000 | 3.869834000  | -0.828200000 |

---

|   |              |              |              |
|---|--------------|--------------|--------------|
| H | -4.060196000 | 1.308965000  | -4.194497000 |
| C | -3.224359000 | 2.616074000  | 0.919298000  |
| H | -3.027218000 | 1.730276000  | 1.530922000  |
| H | -2.343599000 | 3.267168000  | 0.981982000  |
| H | -4.064647000 | 3.155826000  | 1.364422000  |
| H | -2.543761000 | 0.014978000  | -2.715316000 |
| C | 0.587214000  | 2.253874000  | 0.675282000  |
| C | 1.509334000  | 2.978282000  | 1.435619000  |
| C | 1.797140000  | 2.598435000  | 2.739823000  |
| C | 1.142590000  | 1.490784000  | 3.272366000  |
| C | 0.232813000  | 0.822735000  | 2.469275000  |
| N | -0.053223000 | 1.180087000  | 1.199195000  |
| H | 2.518070000  | 3.156530000  | 3.330342000  |
| H | 2.002780000  | 3.835076000  | 0.987773000  |
| H | 1.327265000  | 1.148851000  | 4.285199000  |
| C | 0.325762000  | 2.648512000  | -0.747992000 |
| H | -0.693860000 | 2.415416000  | -1.063164000 |
| H | 0.492539000  | 3.720324000  | -0.888317000 |
| H | 1.011308000  | 2.118727000  | -1.420163000 |
| H | -0.300776000 | -0.040727000 | 2.848106000  |

83

TS5ccis,  $E_{(\text{SCRF})} = -1532.875212$  a.u.,  $\text{IF} = i1247.5833 \text{ cm}^{-1}$

|    |              |              |              |
|----|--------------|--------------|--------------|
| Sc | -1.309711000 | -0.285528000 | 0.039069000  |
| C  | -0.949505000 | -1.501051000 | 2.190754000  |
| C  | -2.154232000 | -0.744977000 | 2.322779000  |
| C  | -3.109799000 | -1.282638000 | 1.413218000  |
| C  | -2.498751000 | -2.363498000 | 0.711730000  |
| C  | -1.168752000 | -2.503189000 | 1.196177000  |
| C  | -2.447279000 | 0.318949000  | 3.342995000  |
| H  | -2.997540000 | 1.166221000  | 2.918752000  |
| H  | -1.540228000 | 0.717391000  | 3.806854000  |
| H  | -3.065129000 | -0.087594000 | 4.154424000  |
| C  | -4.554734000 | -0.890012000 | 1.335948000  |
| H  | -5.155895000 | -1.509927000 | 2.014539000  |
| H  | -4.967800000 | -1.020816000 | 0.330668000  |
| H  | -4.712768000 | 0.152040000  | 1.630451000  |
| C  | -3.184242000 | -3.285373000 | -0.253543000 |
| H  | -2.491024000 | -3.695086000 | -0.995390000 |
| H  | -3.990531000 | -2.781172000 | -0.795110000 |
| H  | -3.633031000 | -4.136942000 | 0.275079000  |
| C  | -0.255695000 | -3.668083000 | 0.951923000  |
| H  | -0.378757000 | -4.408116000 | 1.755352000  |
| H  | 0.801373000  | -3.383628000 | 0.943110000  |
| H  | -0.477638000 | -4.181612000 | 0.012531000  |
| C  | 0.238744000  | -1.485447000 | 3.113519000  |
| H  | 0.248108000  | -2.398487000 | 3.723349000  |
| H  | 1.200354000  | -1.450628000 | 2.587306000  |
| H  | 0.210593000  | -0.648350000 | 3.818265000  |
| C  | 5.419108000  | 1.024295000  | -0.256272000 |
| C  | 6.361212000  | 0.515525000  | 0.644886000  |



---

|   |              |              |              |
|---|--------------|--------------|--------------|
| C | 6.221708000  | -0.792919000 | 1.094926000  |
| C | 5.152322000  | -1.554255000 | 0.632798000  |
| C | 4.256508000  | -0.973572000 | -0.269575000 |
| N | 4.388164000  | 0.289753000  | -0.695770000 |
| H | 6.939596000  | -1.215568000 | 1.793293000  |
| H | 7.187976000  | 1.135198000  | 0.980051000  |
| H | 5.017778000  | -2.583120000 | 0.955673000  |
| C | 5.523115000  | 2.425030000  | -0.795931000 |
| H | 4.579002000  | 2.961986000  | -0.652856000 |
| H | 6.325798000  | 2.989374000  | -0.312705000 |
| H | 5.720298000  | 2.404008000  | -1.874245000 |
| C | 1.738916000  | -1.050762000 | -0.734740000 |
| H | 1.363867000  | -1.057528000 | 0.301796000  |
| H | 1.871288000  | -0.004770000 | -1.039283000 |
| C | 3.098656000  | -1.757613000 | -0.843374000 |
| H | 3.036383000  | -2.719381000 | -0.316503000 |
| C | 3.230407000  | -2.027622000 | -2.367364000 |
| H | 3.752470000  | -2.971363000 | -2.554081000 |
| H | 3.829055000  | -1.230801000 | -2.819259000 |
| C | 1.792891000  | -2.016164000 | -2.937915000 |
| H | 1.542109000  | -2.934326000 | -3.480243000 |
| H | 1.673858000  | -1.189030000 | -3.649340000 |
| C | 0.845433000  | -1.799744000 | -1.730823000 |
| C | -0.469437000 | -1.107503000 | -2.110372000 |
| H | 0.617434000  | -2.783269000 | -1.305442000 |
| H | -0.953273000 | -1.720597000 | -2.887259000 |
| H | -0.231583000 | -0.156515000 | -2.617059000 |
| C | -3.834818000 | 2.004430000  | -0.686311000 |
| C | -4.852584000 | 1.950380000  | -1.640177000 |
| C | -4.930078000 | 0.865741000  | -2.515214000 |
| C | -3.986849000 | -0.158309000 | -2.437300000 |
| C | -2.990961000 | -0.049889000 | -1.469546000 |
| N | -2.931336000 | 1.005474000  | -0.643584000 |
| H | -5.724400000 | 0.826435000  | -3.256399000 |
| H | -5.579677000 | 2.755078000  | -1.692826000 |
| H | -4.020449000 | -1.007109000 | -3.113938000 |
| C | -3.710536000 | 3.121519000  | 0.305401000  |
| H | -2.660356000 | 3.327183000  | 0.530820000  |
| H | -4.180391000 | 4.036412000  | -0.065895000 |
| H | -4.206088000 | 2.857018000  | 1.248157000  |
| H | -1.817348000 | -0.791846000 | -1.693652000 |
| C | 0.320322000  | 2.656364000  | -0.417078000 |
| C | 1.035397000  | 3.777303000  | 0.015263000  |
| C | 1.490300000  | 3.859876000  | 1.324906000  |
| C | 1.218788000  | 2.803889000  | 2.189694000  |
| C | 0.496802000  | 1.727241000  | 1.699091000  |
| N | 0.041158000  | 1.637532000  | 0.432740000  |
| H | 2.047198000  | 4.729356000  | 1.662517000  |
| H | 1.234109000  | 4.578047000  | -0.690282000 |
| H | 1.554472000  | 2.807245000  | 3.221324000  |

---

|   |              |             |              |
|---|--------------|-------------|--------------|
| C | -0.107819000 | 2.560399000 | -1.850823000 |
| H | -1.080178000 | 2.074937000 | -1.956744000 |
| H | -0.170088000 | 3.553809000 | -2.303450000 |
| H | 0.625656000  | 1.984205000 | -2.428175000 |
| H | 0.266078000  | 0.888473000 | 2.343762000  |

83

L3cis,  $E_{(\text{SCRF})} = -1532.92584$  a.u.

|    |              |              |              |
|----|--------------|--------------|--------------|
| Sc | -2.340688000 | -0.129962000 | -0.016953000 |
| C  | -3.557275000 | -2.168795000 | 0.519970000  |
| C  | -4.349108000 | -1.430501000 | -0.411906000 |
| C  | -3.639466000 | -1.380845000 | -1.649915000 |
| C  | -2.407915000 | -2.078986000 | -1.479293000 |
| C  | -2.357176000 | -2.573374000 | -0.138979000 |
| C  | -5.743096000 | -0.919703000 | -0.184657000 |
| H  | -5.929849000 | 0.020327000  | -0.713849000 |
| H  | -5.953994000 | -0.754608000 | 0.876891000  |
| H  | -6.483169000 | -1.645727000 | -0.546523000 |
| C  | -4.156225000 | -0.808250000 | -2.936736000 |
| H  | -4.749418000 | -1.557372000 | -3.478509000 |
| H  | -3.344683000 | -0.494195000 | -3.599725000 |
| H  | -4.802962000 | 0.059010000  | -2.771833000 |
| C  | -1.396185000 | -2.326534000 | -2.562462000 |
| H  | -0.420537000 | -2.616318000 | -2.160141000 |
| H  | -1.248287000 | -1.447611000 | -3.199863000 |
| H  | -1.723799000 | -3.144573000 | -3.217401000 |
| C  | -1.297768000 | -3.465350000 | 0.443025000  |
| H  | -1.578830000 | -4.521079000 | 0.332991000  |
| H  | -1.142592000 | -3.285673000 | 1.512152000  |
| H  | -0.331296000 | -3.343525000 | -0.056332000 |
| C  | -3.963015000 | -2.548221000 | 1.916300000  |
| H  | -4.535491000 | -3.485335000 | 1.911397000  |
| H  | -3.098794000 | -2.711958000 | 2.569008000  |
| H  | -4.604324000 | -1.793606000 | 2.385877000  |
| C  | 4.236969000  | 2.651132000  | -0.103224000 |
| C  | 5.408707000  | 3.411316000  | -0.143210000 |
| C  | 6.619721000  | 2.765805000  | -0.367571000 |
| C  | 6.619494000  | 1.388393000  | -0.550920000 |
| C  | 5.407174000  | 0.691960000  | -0.497974000 |
| N  | 4.240021000  | 1.318017000  | -0.269220000 |
| H  | 7.548504000  | 3.329128000  | -0.404709000 |
| H  | 5.366351000  | 4.487648000  | -0.004661000 |
| H  | 7.545083000  | 0.851410000  | -0.737318000 |
| C  | 2.900448000  | 3.310213000  | 0.114845000  |
| H  | 2.401501000  | 2.906469000  | 1.003669000  |
| H  | 3.002353000  | 4.391162000  | 0.246108000  |
| H  | 2.239877000  | 3.132748000  | -0.742102000 |
| C  | 4.843299000  | -1.635456000 | 0.459941000  |
| H  | 5.525120000  | -1.654764000 | 1.318194000  |
| H  | 3.887023000  | -1.213738000 | 0.800428000  |
| C  | 5.380999000  | -0.802684000 | -0.714224000 |

---

|   |              |              |              |
|---|--------------|--------------|--------------|
| H | 6.414848000  | -1.124869000 | -0.895648000 |
| C | 4.510683000  | -1.265105000 | -1.911610000 |
| H | 5.085218000  | -1.254874000 | -2.843561000 |
| H | 3.677440000  | -0.566995000 | -2.044641000 |
| C | 3.998085000  | -2.679140000 | -1.541479000 |
| H | 4.254746000  | -3.431372000 | -2.294955000 |
| H | 2.901821000  | -2.679394000 | -1.463718000 |
| C | 4.610438000  | -3.016025000 | -0.164152000 |
| C | 3.776048000  | -3.971245000 | 0.680555000  |
| H | 5.596904000  | -3.474074000 | -0.330242000 |
| H | 3.628897000  | -4.930404000 | 0.170370000  |
| H | 2.783256000  | -3.547323000 | 0.885799000  |
| C | -4.057692000 | 2.829707000  | 0.281309000  |
| C | -4.043452000 | 3.926467000  | -0.573378000 |
| C | -3.233145000 | 3.908961000  | -1.714941000 |
| C | -2.445019000 | 2.797509000  | -1.993220000 |
| C | -2.482340000 | 1.704737000  | -1.119321000 |
| N | -3.281118000 | 1.766519000  | -0.023866000 |
| H | -3.228311000 | 4.769156000  | -2.380368000 |
| H | -4.661637000 | 4.790463000  | -0.348886000 |
| H | -1.814361000 | 2.773805000  | -2.877585000 |
| C | -4.879890000 | 2.773555000  | 1.533871000  |
| H | -4.234351000 | 2.760592000  | 2.420831000  |
| H | -5.542947000 | 3.638626000  | 1.613841000  |
| H | -5.492576000 | 1.865778000  | 1.556719000  |
| H | 4.255072000  | -4.179972000 | 1.644301000  |
| C | 0.515152000  | 0.109032000  | 1.278910000  |
| C | 1.505930000  | 0.288934000  | 2.245518000  |
| C | 1.157912000  | 0.295262000  | 3.592382000  |
| C | -0.178894000 | 0.125483000  | 3.952265000  |
| C | -1.112386000 | -0.040946000 | 2.941519000  |
| N | -0.779954000 | -0.050612000 | 1.636173000  |
| H | 1.920072000  | 0.433365000  | 4.354156000  |
| H | 2.533296000  | 0.427768000  | 1.922870000  |
| H | -0.493846000 | 0.124539000  | 4.990409000  |
| C | 0.834291000  | 0.066250000  | -0.186356000 |
| H | 0.163358000  | 0.719546000  | -0.765732000 |
| H | 1.861969000  | 0.398890000  | -0.374548000 |
| H | 0.739957000  | -0.957525000 | -0.571919000 |
| H | -2.166641000 | -0.173141000 | 3.173877000  |

83

K4trans,  $E_{(\text{SCRF})} = -1532.924438$  a.u.

|    |              |              |              |
|----|--------------|--------------|--------------|
| Sc | -1.163650000 | -0.347784000 | -0.070819000 |
| C  | -0.060529000 | -2.233187000 | 1.102455000  |
| C  | -1.229488000 | -1.915387000 | 1.863098000  |
| C  | -2.368705000 | -2.228091000 | 1.061950000  |
| C  | -1.905373000 | -2.730620000 | -0.186913000 |
| C  | -0.485419000 | -2.745201000 | -0.161870000 |
| C  | -1.285082000 | -1.553476000 | 3.323123000  |
| H  | -1.979946000 | -0.733691000 | 3.543144000  |

---

|   |              |              |              |
|---|--------------|--------------|--------------|
| H | -0.306505000 | -1.265363000 | 3.717378000  |
| H | -1.619896000 | -2.415026000 | 3.915729000  |
| C | -3.791262000 | -2.258507000 | 1.538858000  |
| H | -4.048581000 | -3.266551000 | 1.891756000  |
| H | -4.507086000 | -2.009734000 | 0.748478000  |
| H | -3.963979000 | -1.578744000 | 2.378727000  |
| C | -2.754353000 | -3.295914000 | -1.286639000 |
| H | -2.301996000 | -3.142262000 | -2.272645000 |
| H | -3.758961000 | -2.860681000 | -1.301912000 |
| H | -2.880079000 | -4.380175000 | -1.160347000 |
| C | 0.383793000  | -3.423612000 | -1.177695000 |
| H | 0.245987000  | -4.511935000 | -1.119786000 |
| H | 1.443860000  | -3.225270000 | -1.004777000 |
| H | 0.152028000  | -3.124946000 | -2.205449000 |
| C | 1.360360000  | -2.246701000 | 1.596562000  |
| H | 1.726848000  | -3.279219000 | 1.664854000  |
| H | 2.054000000  | -1.699706000 | 0.947432000  |
| H | 1.443641000  | -1.817222000 | 2.598938000  |
| C | 5.228737000  | -0.283796000 | 1.068433000  |
| C | 6.530415000  | -0.621776000 | 0.685878000  |
| C | 6.855974000  | -0.618137000 | -0.665788000 |
| C | 5.876423000  | -0.273298000 | -1.590424000 |
| C | 4.596879000  | 0.054132000  | -1.131914000 |
| N | 4.282728000  | 0.042143000  | 0.173362000  |
| H | 7.859707000  | -0.876433000 | -0.993253000 |
| H | 7.270533000  | -0.879049000 | 1.437856000  |
| H | 6.095279000  | -0.254443000 | -2.654277000 |
| C | 4.832338000  | -0.257449000 | 2.520035000  |
| H | 5.659109000  | -0.558477000 | 3.169408000  |
| H | 4.518848000  | 0.751216000  | 2.814091000  |
| H | 3.988411000  | -0.931157000 | 2.705066000  |
| C | 2.277158000  | -0.512884000 | -2.103925000 |
| H | 2.102543000  | -0.894559000 | -3.116998000 |
| H | 2.443376000  | -1.377067000 | -1.457052000 |
| C | 3.506921000  | 0.447813000  | -2.103685000 |
| H | 3.946474000  | 0.446283000  | -3.107183000 |
| C | -4.270320000 | 0.856993000  | 0.249582000  |
| C | -5.570877000 | 1.112833000  | -0.193673000 |
| C | -5.936744000 | 0.800174000  | -1.497071000 |
| C | -4.986726000 | 0.228296000  | -2.341042000 |
| C | -3.715180000 | -0.000739000 | -1.838682000 |
| N | -3.351485000 | 0.303422000  | -0.574578000 |
| H | -6.946083000 | 0.995860000  | -1.847889000 |
| H | -6.286802000 | 1.555048000  | 0.492666000  |
| H | -5.220456000 | -0.038432000 | -3.366392000 |
| C | -3.859661000 | 1.226827000  | 1.645125000  |
| H | -3.583579000 | 2.286881000  | 1.701551000  |
| H | -4.681845000 | 1.065190000  | 2.348377000  |
| H | -3.000497000 | 0.640799000  | 1.982930000  |
| H | -2.941931000 | -0.444555000 | -2.458081000 |

---

|   |              |              |              |
|---|--------------|--------------|--------------|
| C | 2.922182000  | 1.854169000  | -1.812388000 |
| H | 3.436612000  | 2.640515000  | -2.374494000 |
| H | 3.044395000  | 2.076149000  | -0.745496000 |
| C | 1.438482000  | 1.735230000  | -2.152776000 |
| H | 1.284624000  | 1.774214000  | -3.240415000 |
| H | 0.829176000  | 2.532098000  | -1.711408000 |
| C | 1.058653000  | 0.327022000  | -1.665488000 |
| C | -0.335289000 | -0.166803000 | -2.082670000 |
| H | 1.139318000  | 0.370740000  | -0.545997000 |
| H | -0.857421000 | 0.627118000  | -2.642997000 |
| H | -0.283140000 | -1.042287000 | -2.738870000 |
| C | 0.243144000  | 2.297530000  | 1.507857000  |
| C | 0.486552000  | 3.659020000  | 1.714516000  |
| C | -0.218782000 | 4.611536000  | 0.991498000  |
| C | -1.163105000 | 4.180781000  | 0.061465000  |
| C | -1.361802000 | 2.817115000  | -0.085076000 |
| N | -0.693131000 | 1.883131000  | 0.623272000  |
| H | -0.032852000 | 5.670644000  | 1.145966000  |
| H | 1.237749000  | 3.956319000  | 2.439594000  |
| H | -1.733535000 | 4.880816000  | -0.539976000 |
| C | 1.047525000  | 1.260725000  | 2.225386000  |
| H | 1.399279000  | 1.632478000  | 3.192108000  |
| H | 0.458805000  | 0.356555000  | 2.400150000  |
| H | 1.930980000  | 0.979400000  | 1.634363000  |
| H | -2.087581000 | 2.443529000  | -0.800671000 |

83

TS5dtrans,  $E_{\text{(SCRF)}} = -1532.884541$  a.u., IF =  $i1271.0298$  cm<sup>-1</sup>

|    |              |              |              |
|----|--------------|--------------|--------------|
| Sc | -1.283665000 | -0.347536000 | -0.075574000 |
| C  | -0.276960000 | -2.173775000 | 1.283979000  |
| C  | -1.369209000 | -1.636840000 | 2.033703000  |
| C  | -2.570928000 | -1.925123000 | 1.322576000  |
| C  | -2.228556000 | -2.634854000 | 0.136488000  |
| C  | -0.812906000 | -2.785685000 | 0.111587000  |
| C  | -1.330827000 | -1.031376000 | 3.410581000  |
| H  | -1.750537000 | -0.017821000 | 3.449200000  |
| H  | -0.314156000 | -0.979840000 | 3.809558000  |
| H  | -1.915011000 | -1.642258000 | 4.110140000  |
| C  | -3.956963000 | -1.688898000 | 1.843237000  |
| H  | -4.291032000 | -2.546586000 | 2.443163000  |
| H  | -4.687217000 | -1.559511000 | 1.038586000  |
| H  | -4.008013000 | -0.807183000 | 2.489491000  |
| C  | -3.191075000 | -3.277912000 | -0.818422000 |
| H  | -2.800993000 | -3.308548000 | -1.841209000 |
| H  | -4.152855000 | -2.757535000 | -0.846463000 |
| H  | -3.392692000 | -4.315444000 | -0.519536000 |
| C  | -0.040164000 | -3.664348000 | -0.826244000 |
| H  | 0.060245000  | -4.672761000 | -0.401035000 |
| H  | 0.972713000  | -3.293961000 | -1.010718000 |
| H  | -0.538363000 | -3.778828000 | -1.794019000 |
| C  | 1.155635000  | -2.316654000 | 1.720851000  |

---

|   |              |              |              |
|---|--------------|--------------|--------------|
| H | 1.427398000  | -3.379205000 | 1.755733000  |
| H | 1.873566000  | -1.824358000 | 1.054180000  |
| H | 1.315377000  | -1.917509000 | 2.726615000  |
| C | 5.264456000  | -0.348521000 | 1.031070000  |
| C | 6.588217000  | -0.562920000 | 0.634296000  |
| C | 6.904206000  | -0.498995000 | -0.717865000 |
| C | 5.891813000  | -0.224471000 | -1.631159000 |
| C | 4.592519000  | -0.021590000 | -1.158734000 |
| N | 4.289133000  | -0.084343000 | 0.147317000  |
| H | 7.924390000  | -0.661899000 | -1.055481000 |
| H | 7.351897000  | -0.775049000 | 1.376685000  |
| H | 6.100577000  | -0.168700000 | -2.695749000 |
| C | 4.877256000  | -0.391083000 | 2.484559000  |
| H | 5.700831000  | -0.745115000 | 3.110820000  |
| H | 4.591953000  | 0.607665000  | 2.837182000  |
| H | 4.017413000  | -1.051708000 | 2.637161000  |
| C | 2.294448000  | -0.749015000 | -2.069695000 |
| H | 2.163507000  | -1.209054000 | -3.056077000 |
| H | 2.493567000  | -1.555600000 | -1.358482000 |
| C | 3.461346000  | 0.283588000  | -2.114553000 |
| H | 3.877668000  | 0.289851000  | -3.127936000 |
| C | -4.437815000 | 1.174310000  | -0.072745000 |
| C | -5.448685000 | 1.148372000  | -1.037085000 |
| C | -5.235805000 | 0.498328000  | -2.252289000 |
| C | -4.011915000 | -0.122700000 | -2.501450000 |
| C | -3.043647000 | -0.071500000 | -1.502586000 |
| N | -3.267573000 | 0.563699000  | -0.341755000 |
| H | -6.024515000 | 0.479515000  | -3.000197000 |
| H | -6.396880000 | 1.636488000  | -0.830922000 |
| H | -3.819281000 | -0.630340000 | -3.442036000 |
| C | -4.602370000 | 1.871678000  | 1.245008000  |
| H | -4.763396000 | 2.946743000  | 1.101051000  |
| H | -5.472849000 | 1.486341000  | 1.787222000  |
| H | -3.715443000 | 1.736146000  | 1.867967000  |
| H | -1.736037000 | -0.360809000 | -1.896228000 |
| C | 2.793914000  | 1.656013000  | -1.845431000 |
| H | 3.275917000  | 2.467142000  | -2.400754000 |
| H | 2.877521000  | 1.892552000  | -0.778029000 |
| C | 1.328345000  | 1.451654000  | -2.223199000 |
| H | 1.212209000  | 1.453636000  | -3.316465000 |
| H | 0.667431000  | 2.229850000  | -1.827640000 |
| C | 1.011748000  | 0.039226000  | -1.707222000 |
| C | -0.297721000 | -0.566880000 | -2.226708000 |
| H | 1.021534000  | 0.103254000  | -0.590342000 |
| H | -0.520834000 | -0.128843000 | -3.209593000 |
| H | -0.199097000 | -1.644888000 | -2.387267000 |
| C | 0.465882000  | 2.211945000  | 1.426094000  |
| C | 0.791394000  | 3.553141000  | 1.659104000  |
| C | 0.082503000  | 4.566081000  | 1.029886000  |
| C | -0.953864000 | 4.213501000  | 0.168421000  |

---

|   |              |             |              |
|---|--------------|-------------|--------------|
| C | -1.234194000 | 2.867638000 | -0.003356000 |
| N | -0.558380000 | 1.870360000 | 0.608286000  |
| H | 0.333101000  | 5.608522000 | 1.205146000  |
| H | 1.610647000  | 3.784803000 | 2.332686000  |
| H | -1.538344000 | 4.960248000 | -0.358894000 |
| C | 1.278779000  | 1.126132000 | 2.053276000  |
| H | 1.679174000  | 1.446538000 | 3.019810000  |
| H | 0.678147000  | 0.229773000 | 2.210573000  |
| H | 2.133002000  | 0.851174000 | 1.416343000  |
| H | -2.040656000 | 2.562546000 | -0.659956000 |

83

L4trans,  $E_{\text{(SCRF)}} = -1532.925819$  a.u.

|    |              |              |              |
|----|--------------|--------------|--------------|
| Sc | 2.619203000  | -0.141235000 | 0.080226000  |
| C  | 2.490396000  | -2.401307000 | -0.845424000 |
| C  | 3.102514000  | -1.568391000 | -1.834749000 |
| C  | 4.352963000  | -1.116966000 | -1.319049000 |
| C  | 4.512394000  | -1.655334000 | -0.006113000 |
| C  | 3.361124000  | -2.450619000 | 0.282641000  |
| C  | 2.576026000  | -1.305482000 | -3.218204000 |
| H  | 2.888044000  | -0.328160000 | -3.601574000 |
| H  | 1.482417000  | -1.347181000 | -3.265793000 |
| H  | 2.950872000  | -2.057950000 | -3.924438000 |
| C  | 5.369950000  | -0.286824000 | -2.047152000 |
| H  | 6.130610000  | -0.927406000 | -2.512615000 |
| H  | 5.893283000  | 0.400740000  | -1.374886000 |
| H  | 4.919207000  | 0.308569000  | -2.847096000 |
| C  | 5.741288000  | -1.535863000 | 0.847883000  |
| H  | 5.512655000  | -1.613749000 | 1.915484000  |
| H  | 6.256807000  | -0.584215000 | 0.690026000  |
| H  | 6.453084000  | -2.337892000 | 0.610634000  |
| C  | 3.151696000  | -3.280437000 | 1.517330000  |
| H  | 3.586624000  | -4.280679000 | 1.389399000  |
| H  | 2.089922000  | -3.423407000 | 1.745553000  |
| H  | 3.631927000  | -2.840701000 | 2.398547000  |
| C  | 1.229370000  | -3.200632000 | -1.010062000 |
| H  | 1.464281000  | -4.231175000 | -1.307801000 |
| H  | 0.646702000  | -3.262292000 | -0.084500000 |
| H  | 0.577933000  | -2.791612000 | -1.788749000 |
| C  | -4.577862000 | 2.687288000  | -0.053412000 |
| C  | -5.647396000 | 3.433969000  | -0.553874000 |
| C  | -6.760829000 | 2.763210000  | -1.048145000 |
| C  | -6.771764000 | 1.374077000  | -1.020484000 |
| C  | -5.665720000 | 0.692400000  | -0.501501000 |
| N  | -4.587628000 | 1.344223000  | -0.034101000 |
| H  | -7.608070000 | 3.315727000  | -1.445912000 |
| H  | -5.603488000 | 4.519130000  | -0.552580000 |
| H  | -7.626245000 | 0.816239000  | -1.392681000 |
| C  | -3.354813000 | 3.370499000  | 0.499452000  |
| H  | -3.453950000 | 4.459061000  | 0.465662000  |
| H  | -3.182322000 | 3.076505000  | 1.541046000  |

---

|                                             |              |              |              |
|---------------------------------------------|--------------|--------------|--------------|
| H                                           | -2.459624000 | 3.095003000  | -0.071218000 |
| C                                           | -4.471031000 | -1.525214000 | -1.110401000 |
| H                                           | -4.745114000 | -1.847630000 | -2.121959000 |
| H                                           | -3.628798000 | -0.833291000 | -1.216328000 |
| C                                           | -5.669755000 | -0.816044000 | -0.423881000 |
| H                                           | -6.593018000 | -1.164569000 | -0.903682000 |
| C                                           | 3.366201000  | 3.137181000  | -0.674538000 |
| C                                           | 4.166538000  | 4.018730000  | 0.043432000  |
| C                                           | 4.763417000  | 3.601446000  | 1.239222000  |
| C                                           | 4.559506000  | 2.307341000  | 1.705330000  |
| C                                           | 3.750100000  | 1.440968000  | 0.962110000  |
| N                                           | 3.184316000  | 1.888893000  | -0.187570000 |
| H                                           | 5.388923000  | 4.295937000  | 1.795230000  |
| H                                           | 4.325647000  | 5.025805000  | -0.330072000 |
| H                                           | 5.022103000  | 1.971815000  | 2.629180000  |
| C                                           | 2.690876000  | 3.504470000  | -1.961980000 |
| H                                           | 2.972318000  | 4.509613000  | -2.285786000 |
| H                                           | 2.959393000  | 2.800348000  | -2.757606000 |
| H                                           | 1.599650000  | 3.479307000  | -1.853105000 |
| H                                           | -3.599029000 | -4.857327000 | -0.308089000 |
| C                                           | -5.665113000 | -1.374088000 | 1.014287000  |
| H                                           | -6.635359000 | -1.263191000 | 1.510680000  |
| H                                           | -4.922817000 | -0.830103000 | 1.613452000  |
| C                                           | -5.234830000 | -2.825991000 | 0.815706000  |
| H                                           | -6.069754000 | -3.405824000 | 0.397000000  |
| H                                           | -4.931471000 | -3.323497000 | 1.744211000  |
| C                                           | -4.093730000 | -2.736919000 | -0.213244000 |
| C                                           | -3.844677000 | -4.029646000 | -0.984188000 |
| H                                           | -3.175366000 | -2.481978000 | 0.336791000  |
| H                                           | -4.735006000 | -4.320734000 | -1.555547000 |
| H                                           | -3.016312000 | -3.923478000 | -1.695541000 |
| C                                           | -0.520838000 | 0.094296000  | 0.689406000  |
| C                                           | -1.683101000 | 0.138218000  | 1.459356000  |
| C                                           | -1.608708000 | -0.169504000 | 2.815974000  |
| C                                           | -0.379820000 | -0.511389000 | 3.377758000  |
| C                                           | 0.733106000  | -0.531850000 | 2.551412000  |
| N                                           | 0.669480000  | -0.241496000 | 1.237732000  |
| H                                           | -2.504796000 | -0.138940000 | 3.429655000  |
| H                                           | -2.628817000 | 0.422679000  | 0.995142000  |
| H                                           | -0.280391000 | -0.753516000 | 4.430598000  |
| C                                           | -0.525159000 | 0.419360000  | -0.777150000 |
| H                                           | 0.160864000  | 1.247838000  | -1.003915000 |
| H                                           | -0.227908000 | -0.451497000 | -1.375547000 |
| H                                           | -1.521455000 | 0.720751000  | -1.109410000 |
| H                                           | 1.715486000  | -0.784179000 | 2.944479000  |
| 71                                          |              |              |              |
| D5, $E_{(\text{SCRF})} = -1192.397097$ a.u. |              |              |              |
| Sc                                          | -0.779977000 | -0.233580000 | -0.257245000 |
| C                                           | -2.310609000 | 0.603708000  | -1.988024000 |
| C                                           | -2.094618000 | -0.777591000 | -2.275949000 |



---

|   |              |              |              |
|---|--------------|--------------|--------------|
| C | -2.645038000 | -1.538900000 | -1.199050000 |
| C | -3.184801000 | -0.627919000 | -0.244082000 |
| C | -2.976066000 | 0.697924000  | -0.729528000 |
| C | -1.543390000 | -1.338497000 | -3.556456000 |
| H | -1.093815000 | -2.327269000 | -3.417595000 |
| H | -0.784751000 | -0.690060000 | -4.007312000 |
| H | -2.341370000 | -1.457647000 | -4.301283000 |
| C | -2.802661000 | -3.032585000 | -1.167149000 |
| H | -3.761195000 | -3.321590000 | -1.617903000 |
| H | -2.802043000 | -3.433095000 | -0.147777000 |
| H | -2.021211000 | -3.551026000 | -1.731392000 |
| C | -3.971690000 | -0.991224000 | 0.981004000  |
| H | -3.813224000 | -0.281078000 | 1.798520000  |
| H | -3.719004000 | -1.989429000 | 1.351508000  |
| H | -5.047236000 | -0.995110000 | 0.759701000  |
| C | -3.526073000 | 1.957548000  | -0.127262000 |
| H | -4.529044000 | 2.164890000  | -0.524688000 |
| H | -2.901851000 | 2.827648000  | -0.352991000 |
| H | -3.615441000 | 1.888418000  | 0.960490000  |
| C | -2.059163000 | 1.760883000  | -2.911632000 |
| H | -3.003707000 | 2.099315000  | -3.357532000 |
| H | -1.627196000 | 2.627224000  | -2.397561000 |
| H | -1.399279000 | 1.492814000  | -3.742084000 |
| C | -0.822518000 | -0.673707000 | 3.173063000  |
| C | -0.797561000 | 0.304711000  | 4.160807000  |
| C | -0.715504000 | 1.655985000  | 3.802025000  |
| C | -0.658380000 | 2.016693000  | 2.460715000  |
| C | -0.680509000 | 1.007598000  | 1.489690000  |
| N | -0.754341000 | -0.283077000 | 1.879201000  |
| H | -0.703692000 | 2.416388000  | 4.579413000  |
| H | -0.847637000 | 0.014245000  | 5.205896000  |
| H | -0.608245000 | 3.063162000  | 2.173027000  |
| C | -0.919029000 | -2.139081000 | 3.477902000  |
| H | -1.030057000 | -2.313381000 | 4.551015000  |
| H | -1.780616000 | -2.586249000 | 2.969601000  |
| H | -0.023384000 | -2.675585000 | 3.141950000  |
| C | 1.103424000  | 0.689115000  | -1.868043000 |
| H | 0.616543000  | 1.178945000  | -2.706955000 |
| H | 1.346837000  | -0.366945000 | -1.991269000 |
| C | 1.549710000  | 1.398311000  | -0.810658000 |
| H | 2.101007000  | 0.879159000  | -0.022256000 |
| C | 1.472911000  | 2.885052000  | -0.672915000 |
| H | 1.073823000  | 3.147898000  | 0.312547000  |
| H | 0.796269000  | 3.302108000  | -1.428235000 |
| C | 2.876170000  | 3.523997000  | -0.818625000 |
| H | 3.281535000  | 3.257668000  | -1.804966000 |
| H | 3.555273000  | 3.099556000  | -0.068025000 |
| C | 2.824315000  | 5.017111000  | -0.670660000 |
| C | 3.430528000  | 5.703826000  | 0.297352000  |
| H | 2.242159000  | 5.552375000  | -1.422528000 |

---

|   |              |              |              |
|---|--------------|--------------|--------------|
| H | 3.364734000  | 6.786825000  | 0.354630000  |
| H | 4.028889000  | 5.211369000  | 1.061994000  |
| C | 0.447561000  | -2.634227000 | -0.256479000 |
| H | 0.372184000  | -3.046294000 | -1.261332000 |
| H | -0.429008000 | -2.738062000 | 0.385791000  |
| C | 1.622062000  | -2.200495000 | 0.238826000  |
| H | 1.655211000  | -1.861541000 | 1.276710000  |
| C | 2.929535000  | -2.224482000 | -0.486303000 |
| H | 3.402884000  | -1.233876000 | -0.455353000 |
| H | 2.777897000  | -2.484633000 | -1.541535000 |
| C | 3.906430000  | -3.237033000 | 0.162211000  |
| H | 3.439453000  | -4.231636000 | 0.140927000  |
| H | 4.059743000  | -2.977077000 | 1.217298000  |
| C | 5.226598000  | -3.272496000 | -0.551875000 |
| C | 6.392007000  | -2.930042000 | -0.003788000 |
| H | 5.200446000  | -3.606447000 | -1.590281000 |
| H | 7.321375000  | -2.980002000 | -0.564287000 |
| H | 6.464817000  | -2.600367000 | 1.031169000  |

71

TS2e,  $E_{\text{(SCRF)}} = -1192.381107$  a.u.,  $\text{IF} = i271.4903 \text{ cm}^{-1}$

|    |              |              |              |
|----|--------------|--------------|--------------|
| Sc | 0.012212000  | -0.597322000 | -0.279120000 |
| C  | -1.330529000 | -1.287641000 | -2.218645000 |
| C  | -0.138306000 | -2.069865000 | -2.245431000 |
| C  | -0.144477000 | -2.925665000 | -1.100781000 |
| C  | -1.327872000 | -2.653703000 | -0.355936000 |
| C  | -2.063289000 | -1.642523000 | -1.045334000 |
| C  | 0.852560000  | -2.089296000 | -3.375119000 |
| H  | 1.780629000  | -2.601203000 | -3.102689000 |
| H  | 1.113654000  | -1.083074000 | -3.724100000 |
| H  | 0.440472000  | -2.625806000 | -4.239897000 |
| C  | 0.828028000  | -4.035720000 | -0.819102000 |
| H  | 0.471236000  | -4.975224000 | -1.261245000 |
| H  | 0.952732000  | -4.223428000 | 0.253286000  |
| H  | 1.819349000  | -3.846158000 | -1.242472000 |
| C  | -1.814155000 | -3.402807000 | 0.850761000  |
| H  | -2.348278000 | -2.754961000 | 1.554044000  |
| H  | -0.997900000 | -3.887459000 | 1.395422000  |
| H  | -2.513164000 | -4.196457000 | 0.554608000  |
| C  | -3.457104000 | -1.206867000 | -0.693881000 |
| H  | -4.184071000 | -1.960284000 | -1.025595000 |
| H  | -3.732297000 | -0.265967000 | -1.177213000 |
| H  | -3.595066000 | -1.080074000 | 0.384967000  |
| C  | -1.803621000 | -0.405316000 | -3.336768000 |
| H  | -2.354032000 | -0.996083000 | -4.081315000 |
| H  | -2.482199000 | 0.381468000  | -2.993670000 |
| H  | -0.972960000 | 0.075697000  | -3.863853000 |
| C  | 0.068535000  | -1.065496000 | 3.082463000  |
| C  | -0.776919000 | -0.656257000 | 4.104693000  |
| C  | -1.766056000 | 0.294444000  | 3.836641000  |
| C  | -1.885719000 | 0.839045000  | 2.564191000  |

---

|   |              |              |              |
|---|--------------|--------------|--------------|
| C | -1.019709000 | 0.396328000  | 1.557812000  |
| N | -0.086961000 | -0.526463000 | 1.848691000  |
| H | -2.439638000 | 0.610846000  | 4.629036000  |
| H | -0.667274000 | -1.077978000 | 5.098794000  |
| H | -2.637416000 | 1.596218000  | 2.373982000  |
| C | 1.158184000  | -2.075020000 | 3.279963000  |
| H | 1.102170000  | -2.527050000 | 4.273147000  |
| H | 1.090750000  | -2.876127000 | 2.535985000  |
| H | 2.146735000  | -1.610700000 | 3.179336000  |
| C | 0.065165000  | 1.529318000  | -1.000120000 |
| H | -0.356705000 | 1.577748000  | -2.003014000 |
| H | 1.108806000  | 1.837227000  | -0.932386000 |
| C | -0.798462000 | 1.862529000  | 0.083969000  |
| H | -0.345467000 | 2.430749000  | 0.898523000  |
| C | -2.210800000 | 2.285052000  | -0.258100000 |
| H | -2.926823000 | 2.096238000  | 0.544138000  |
| H | -2.554916000 | 1.710409000  | -1.124968000 |
| C | -2.248120000 | 3.791994000  | -0.595060000 |
| H | -1.538606000 | 3.990246000  | -1.410646000 |
| H | -1.905610000 | 4.371880000  | 0.272148000  |
| C | -3.625267000 | 4.238758000  | -0.992451000 |
| C | -4.360618000 | 5.124731000  | -0.321105000 |
| H | -4.030932000 | 3.788642000  | -1.900301000 |
| H | -5.352352000 | 5.414354000  | -0.657418000 |
| H | -3.993703000 | 5.606771000  | 0.583515000  |
| C | 2.622343000  | -1.112809000 | -0.286948000 |
| H | 2.800718000  | -1.307493000 | -1.343358000 |
| H | 2.267609000  | -1.949303000 | 0.316710000  |
| C | 3.017183000  | 0.038569000  | 0.290449000  |
| H | 2.878728000  | 0.152825000  | 1.367796000  |
| C | 3.727118000  | 1.159559000  | -0.395442000 |
| H | 3.253983000  | 2.118202000  | -0.144694000 |
| H | 3.676280000  | 1.037614000  | -1.484298000 |
| C | 5.208811000  | 1.232643000  | 0.054414000  |
| H | 5.694131000  | 0.277995000  | -0.192114000 |
| H | 5.258853000  | 1.345766000  | 1.144823000  |
| C | 5.934301000  | 2.366959000  | -0.609634000 |
| C | 6.459112000  | 3.408938000  | 0.034331000  |
| H | 6.022338000  | 2.308361000  | -1.695586000 |
| H | 6.979582000  | 4.202200000  | -0.495040000 |
| H | 6.401035000  | 3.503075000  | 1.117329000  |

71

E5,  $E_{(\text{SCRF})} = -1192.422233$  a.u.

|    |              |             |              |
|----|--------------|-------------|--------------|
| Sc | -0.114340000 | 0.817526000 | 0.056750000  |
| C  | 0.772397000  | 2.272544000 | -1.709210000 |
| C  | -0.426321000 | 2.890777000 | -1.242360000 |
| C  | -0.224324000 | 3.289191000 | 0.114157000  |
| C  | 1.098719000  | 2.905073000 | 0.489628000  |
| C  | 1.712443000  | 2.281254000 | -0.639544000 |
| C  | -1.617219000 | 3.201111000 | -2.105285000 |

---

|   |              |              |              |
|---|--------------|--------------|--------------|
| H | -2.486351000 | 3.515011000  | -1.519013000 |
| H | -1.918129000 | 2.352341000  | -2.731342000 |
| H | -1.386605000 | 4.027457000  | -2.790275000 |
| C | -1.172037000 | 4.105276000  | 0.947566000  |
| H | -0.966563000 | 5.176703000  | 0.824105000  |
| H | -1.084034000 | 3.891454000  | 2.018638000  |
| H | -2.218213000 | 3.951415000  | 0.664179000  |
| C | 1.807162000  | 3.265484000  | 1.766518000  |
| H | 2.431168000  | 2.450659000  | 2.151548000  |
| H | 1.110455000  | 3.557191000  | 2.558294000  |
| H | 2.473258000  | 4.122636000  | 1.601862000  |
| C | 3.149650000  | 1.859204000  | -0.717036000 |
| H | 3.782840000  | 2.716523000  | -0.983334000 |
| H | 3.312659000  | 1.090492000  | -1.477419000 |
| H | 3.522560000  | 1.475046000  | 0.238421000  |
| C | 1.028107000  | 1.841677000  | -3.122658000 |
| H | 1.281209000  | 2.708997000  | -3.747140000 |
| H | 1.862672000  | 1.138779000  | -3.192030000 |
| H | 0.153608000  | 1.363781000  | -3.577403000 |
| C | 0.120707000  | -0.538075000 | 3.022054000  |
| C | 0.297822000  | -1.591389000 | 3.911786000  |
| C | 0.704135000  | -2.831404000 | 3.424272000  |
| C | 0.940960000  | -2.978889000 | 2.065077000  |
| C | 0.777204000  | -1.887110000 | 1.208869000  |
| N | 0.356254000  | -0.689540000 | 1.694286000  |
| H | 0.836015000  | -3.670841000 | 4.101426000  |
| H | 0.110120000  | -1.439745000 | 4.970259000  |
| H | 1.263123000  | -3.930871000 | 1.654267000  |
| C | -0.372808000 | 0.795922000  | 3.506951000  |
| H | 0.137533000  | 1.090776000  | 4.429320000  |
| H | -0.196925000 | 1.590962000  | 2.773566000  |
| H | -1.446435000 | 0.762302000  | 3.731970000  |
| C | 0.404567000  | -0.939064000 | -1.119812000 |
| H | 0.896154000  | -0.836446000 | -2.091101000 |
| H | -0.619607000 | -1.296179000 | -1.353035000 |
| C | 1.113842000  | -2.001830000 | -0.263921000 |
| H | 0.805627000  | -3.017046000 | -0.564924000 |
| C | 2.657150000  | -1.967179000 | -0.407581000 |
| H | 3.107706000  | -2.612595000 | 0.357560000  |
| H | 3.011707000  | -0.948640000 | -0.199181000 |
| C | 3.166017000  | -2.431002000 | -1.780483000 |
| H | 2.752159000  | -1.785296000 | -2.568011000 |
| H | 2.797164000  | -3.445558000 | -1.981748000 |
| C | 4.665521000  | -2.412199000 | -1.860837000 |
| C | 5.432806000  | -3.483517000 | -2.060762000 |
| H | 5.139791000  | -1.436396000 | -1.738216000 |
| H | 6.515733000  | -3.409131000 | -2.110513000 |
| H | 5.006719000  | -4.476486000 | -2.193549000 |
| C | -2.733740000 | 0.929467000  | 0.500640000  |
| H | -3.056881000 | 1.645829000  | -0.251920000 |

---

|   |              |              |              |
|---|--------------|--------------|--------------|
| H | -2.431600000 | 1.338350000  | 1.466236000  |
| C | -2.908398000 | -0.396390000 | 0.323717000  |
| H | -2.641073000 | -1.071175000 | 1.140115000  |
| C | -3.535899000 | -1.035173000 | -0.872172000 |
| H | -2.909914000 | -1.860508000 | -1.233666000 |
| H | -3.632068000 | -0.309063000 | -1.688530000 |
| C | -4.930772000 | -1.611771000 | -0.517529000 |
| H | -5.563453000 | -0.792090000 | -0.149278000 |
| H | -4.834042000 | -2.335669000 | 0.301523000  |
| C | -5.575430000 | -2.267496000 | -1.704330000 |
| C | -5.881428000 | -3.562298000 | -1.778856000 |
| H | -5.797461000 | -1.614485000 | -2.549707000 |
| H | -6.353602000 | -3.985720000 | -2.660954000 |
| H | -5.684649000 | -4.247220000 | -0.955893000 |
